# Supplementary material
Source: publisher figshare collection journal article supplement (https://gsapubs.figshare.com/articles/dataset/_/13697626)
Supplement: Supplementary file 1 [file 1]

TABLE S1: LINKS FOR PUBLICLY ACCESSIBLE DATA SOURCES USED IN THIS STUDY

| Data Type         | Source                                         | URL                                                                                                                                                             |
|-------------------|------------------------------------------------|-----------------------------------------------------------------------------------------------------------------------------------------------------------------|
| Water wells       | Oregon Water Resources                         | <a href="https://apps.wrd.state.or.us/apps/gw/gw_info/gw_info_repo/gw_search.aspx">https://apps.wrd.state.or.us/apps/gw/gw_info/gw_info_repo/gw_search.aspx</a> |
|                   | Department Groundwater Site Information System |                                                                                                                                                                 |
|                   | Washington Department of Natural Resources     |                                                                                                                                                                 |
| Oil and Gas wells | Washington Department of Ecology               | <a href="https://www.dnr.wa.gov/geologyportal">https://www.dnr.wa.gov/geologyportal</a>                                                                         |
|                   | DOGAMI Oil and Gas Well Log Index              | <a href="https://fortress.wa.gov/ecy/wellconstruction/map/wclswb/Map/default.aspx">https://fortress.wa.gov/ecy/wellconstruction/map/wclswb/Map/default.aspx</a> |
|                   | USGS Columbia River                            | <a href="https://www.oregongeology.org/mlrr/oilgas-logs.htm">https://www.oregongeology.org/mlrr/oilgas-logs.htm</a>                                             |
| Geologic Logs     | Basalt Stratigraphy in the Pacific Northwest   | <a href="https://or.water.usgs.gov/projs_dir/crbg/data/index.html">https://or.water.usgs.gov/projs_dir/crbg/data/index.html</a>                                 |
| 10 m DEM          | USGS The National Map Database                 | <a href="https://viewer.nationalmap.gov/basic/">https://viewer.nationalmap.gov/basic/</a>                                                                       |
