# Supplementary material
Source: publisher figshare collection journal article supplement (https://gsapubs.figshare.com/articles/dataset/_/13697626)
Supplement: Supplementary file 2 [file 1]

TABLE S2: WELL NAMES, SURFACE ELEVATIONS, AND STRATIGRAPHIC PICKS FOR SURFACES DESCRIBED IN THE TEXT

| ID | Name                 | Source*             | Lat†<br>(N)<br>(NAD83) | Long†<br>(W)<br>(NAD83) | Ground<br>Elevation (m) | Top CRBG<br>MD (m) | Base CRBG<br>MD (m) |
|----|----------------------|---------------------|------------------------|-------------------------|-------------------------|--------------------|---------------------|
| 0  | GT_000884_B-5        | Roe and Madin, 2013 | 45.47541               | -122.671531             | 13.1                    | 9.2                | 70.1                |
| 1  | GT_000216_LRS-1      | Roe and Madin, 2013 | 45.507396              | -122.715216             | 185.2                   | 22.4               |                     |
| 2  | GT_000216_LRS-2      | Roe and Madin, 2013 | 45.507336              | -122.714609             | 181.4                   | 19.5               |                     |
| 3  | GT_000216_LRS-3      | Roe and Madin, 2013 | 45.507851              | -122.71439              | 185.1                   | 19.8               |                     |
| 4  | GT_000247_B-4        | Roe and Madin, 2013 | 45.476439              | -122.677319             | 38.9                    | 0.0                | 52.1                |
| 5  | GT_000355_B-1        | Roe and Madin, 2013 | 45.507513              | -122.712623             | 189.8                   | 25.5               |                     |
| 6  | GT_000361_B-1        | Roe and Madin, 2013 | 45.498736              | -122.687975             | 155.4                   | 12.8               | 165.2               |
| 7  | GT_000361_B-2        | Roe and Madin, 2013 | 45.498881              | -122.688003             | 162.8                   | 16.8               |                     |
| 8  | GT_000361_B-3        | Roe and Madin, 2013 | 45.499017              | -122.687425             | 156.5                   | 8.7                | 160.9               |
| 9  | GT_000361_B-4        | Roe and Madin, 2013 | 45.498755              | -122.68745              | 147.8                   | 12.8               |                     |
| 10 | GT_000362_B-1        | Roe and Madin, 2013 | 45.498094              | -122.688423             | 149.8                   | 5.3                |                     |
| 11 | GT_000362_B-2        | Roe and Madin, 2013 | 45.498333              | -122.689371             | 161.1                   | 12.3               |                     |
| 12 | GT_000362_B-3        | Roe and Madin, 2013 | 45.498325              | -122.689084             | 156.8                   | 10.5               |                     |
| 13 | GT_000362_B-4        | Roe and Madin, 2013 | 45.497737              | -122.688363             | 154.7                   | 11.2               |                     |
| 14 | GT_000362_B-5        | Roe and Madin, 2013 | 45.497692              | -122.688518             | 160.1                   | 9.2                |                     |
| 15 | GT_000362_B-6        | Roe and Madin, 2013 | 45.498335              | -122.688163             | 142.4                   | 1.6                |                     |
| 16 | GT_000362_B-8        | Roe and Madin, 2013 | 45.498118              | -122.68889              | 156.6                   | 7.6                |                     |
| 17 | GT_000362_B-9        | Roe and Madin, 2013 | 45.497828              | -122.688629             | 154.0                   | 7.4                |                     |
| 18 | GT_001070_B-5        | Roe and Madin, 2013 | 45.511002              | -122.71821              | 221.6                   | 18.3               |                     |
| 19 | GT_001420_B-1        | Roe and Madin, 2013 | 45.500262              | -122.686657             | 171.3                   | 11.9               |                     |
| 20 | GT_001420_B-2        | Roe and Madin, 2013 | 45.50019               | -122.686322             | 170.2                   | 10.2               |                     |
| 21 | GT_001420_B-3        | Roe and Madin, 2013 | 45.500443              | -122.68643              | 166.9                   | 9.0                |                     |
| 22 | GT_001420_B-4        | Roe and Madin, 2013 | 45.5007                | -122.686192             | 163.3                   | 8.8                |                     |
| 23 | GT_001420_B-5        | Roe and Madin, 2013 | 45.500493              | -122.686164             | 164.3                   | 8.2                |                     |
| 24 | GT_001758_B-1        | Roe and Madin, 2013 | 45.490344              | -122.698277             | 309.2                   | 7.4                |                     |
| 25 | GT_003109_B-3        | Roe and Madin, 2013 | 45.460797              | -122.660177             | 11.0                    | 7.4                |                     |
| 26 | GT_003860_B-4        | Roe and Madin, 2013 | 45.48359               | -122.705506             | 125.3                   | 11.0               |                     |
| 27 | GT_003973_TB-1       | Roe and Madin, 2013 | 45.478125              | -122.705674             | 141.3                   | 9.3                |                     |
| 28 | GT_003987_B-8        | Roe and Madin, 2013 | 45.491316              | -122.670472             | 3.2                     | 3.2                |                     |
| 29 | GT_003987_B-13       | Roe and Madin, 2013 | 45.490838              | -122.671381             | 3.8                     | 0.0                | 90.8                |
| 30 | GT_004243_B-5        | Roe and Madin, 2013 | 45.500853              | -122.687939             | 159.0                   | 9.4                |                     |
| 31 | GT_004325_B-1        | Roe and Madin, 2013 | 45.500231              | -122.718844             | 254.8                   | 13.4               |                     |
| 32 | GT_006284_PH-1       | Roe and Madin, 2013 | 45.51259               | -122.718659             | 242.3                   | 37.8               |                     |
| 33 | GT_006284_LT-17      | Roe and Madin, 2013 | 45.511632              | -122.720363             | 236.4                   | 42.6               |                     |
| 34 | GT_006284_PH-3       | Roe and Madin, 2013 | 45.513652              | -122.718158             | 245.0                   | 37.4               |                     |
| 35 | GT_006284_PH-2       | Roe and Madin, 2013 | 45.513772              | -122.718898             | 247.0                   | 39.2               |                     |
| 36 | GT_006284_LT-19/PH-4 | Roe and Madin, 2013 | 45.513466              | -122.719106             | 251.2                   | 39.7               |                     |
| 37 | GT_005950_B-1        | Roe and Madin, 2013 | 45.508194              | -122.70029              | 214.9                   | 11.6               |                     |
| 38 | GT_006568_B-1        | Roe and Madin, 2013 | 45.500174              | -122.68819              | 173.7                   | 10.6               |                     |
| 39 | GT_006568_B-3        | Roe and Madin, 2013 | 45.50035               | -122.688679             | 164.0                   | 8.3                |                     |
| 40 | GT_006568_B-4        | Roe and Madin, 2013 | 45.500231              | -122.68871              | 165.9                   | 6.2                |                     |
| 41 | GT_006746_B-1        | Roe and Madin, 2013 | 45.503566              | -122.702333             | 212.4                   | 5.4                |                     |
| 42 | GT_006849_B-2        | Roe and Madin, 2013 | 45.493629              | -122.671106             | 11.5                    | 17.6               |                     |
| 43 | GT_003164_B-4        | Roe and Madin, 2013 | 45.499931              | -122.688441             | 174.4                   | 14.4               |                     |

|    |                         |                     |           |             |       |      |       |
|----|-------------------------|---------------------|-----------|-------------|-------|------|-------|
| 44 | GT_003164_B-3           | Roe and Madin, 2013 | 45.499733 | -122.688605 | 174.3 | 14.0 |       |
| 45 | GT_003164_B-2           | Roe and Madin, 2013 | 45.499533 | -122.68854  | 175.1 | 11.1 |       |
| 46 | MTL-010-030_030         | Roe and Madin, 2013 | 45.488077 | -122.675203 | 21.3  | 4.8  |       |
| 47 | GT_004227_B-15          | Roe and Madin, 2013 | 45.501525 | -122.684604 | 151.9 | 7.2  |       |
| 48 | GT_004227_B-14          | Roe and Madin, 2013 | 45.501696 | -122.684661 | 154.5 | 11.8 |       |
| 49 | GT_004228_B-4           | Roe and Madin, 2013 | 45.497734 | -122.686912 | 142.0 | 5.7  |       |
| 50 | GT_004228_B-3           | Roe and Madin, 2013 | 45.497698 | -122.687344 | 148.0 | 8.4  |       |
| 51 | GT_004228_B-6           | Roe and Madin, 2013 | 45.49744  | -122.68638  | 154.5 | 4.3  |       |
| 52 | GT_004228_B-9           | Roe and Madin, 2013 | 45.497234 | -122.686203 | 159.2 | 10.8 |       |
| 53 | GT_004228_B-2           | Roe and Madin, 2013 | 45.497217 | -122.686561 | 166.2 | 18.7 |       |
| 54 | GT_004228_B-7           | Roe and Madin, 2013 | 45.497391 | -122.685777 | 152.1 | 6.5  |       |
| 55 | GT_004228_B-1           | Roe and Madin, 2013 | 45.496949 | -122.685609 | 167.7 | 21.7 |       |
| 56 | GT_004228_B-8           | Roe and Madin, 2013 | 45.497929 | -122.685692 | 124.1 | 4.6  |       |
| 57 | GT_004237_B-1           | Roe and Madin, 2013 | 45.499762 | -122.684922 | 149.6 | 7.3  |       |
| 58 | MTL-5032-5037_B-5       | Roe and Madin, 2013 | 45.486203 | -122.672549 | 10.6  | 12.7 |       |
| 59 | MTL-5032-5037_B-1       | Roe and Madin, 2013 | 45.4873   | -122.674915 | 16.4  | 6.3  |       |
| 60 | MTL-5032-5037_B-2       | Roe and Madin, 2013 | 45.487449 | -122.673699 | 13.8  | 12.3 |       |
| 61 | MTL-5032-5037_B-3       | Roe and Madin, 2013 | 45.486826 | -122.673709 | 13.9  | 12.4 |       |
| 62 | MTL-9454_B-1            | Roe and Madin, 2013 | 45.422085 | -122.65825  | 13.7  | 6.0  | 67.1  |
| 63 | MTL-9510-9546_B-3       | Roe and Madin, 2013 | 45.489377 | -122.680429 | 56.1  | 6.7  |       |
| 64 | MTL-9510-9546_B-5       | Roe and Madin, 2013 | 45.489526 | -122.679396 | 72.6  | 24.1 | 115.5 |
| 65 | MTL-9510-9546_B-11      | Roe and Madin, 2013 | 45.488225 | -122.676993 | 45.5  | 19.9 |       |
| 66 | MTL-9965-10039-B_BH-7   | Roe and Madin, 2013 | 45.493712 | -122.672076 | 12.7  | 14.8 |       |
| 67 | MTL-9965-10039-B_BH-19  | Roe and Madin, 2013 | 45.479454 | -122.673811 | 15.4  | 11.8 | 72.8  |
| 68 | MTL-9965-10039-B_BH-32  | Roe and Madin, 2013 | 45.487749 | -122.673858 | 14.4  | 8.0  |       |
| 69 | MTL-9965-10039-B_BH-35  | Roe and Madin, 2013 | 45.488724 | -122.672636 | 12.0  | 6.5  |       |
| 70 | MTL-9965-10039-B_BH-36  | Roe and Madin, 2013 | 45.489302 | -122.672505 | 11.5  | 4.5  |       |
| 71 | MTL-9965-10039-B_BH-40  | Roe and Madin, 2013 | 45.491735 | -122.672165 | 12.6  | 7.4  |       |
| 72 | MTL-9965-10039-B_BH-41  | Roe and Madin, 2013 | 45.492124 | -122.672125 | 12.4  | 6.9  |       |
| 73 | MTL-9965-10039-B_BH-42  | Roe and Madin, 2013 | 45.492585 | -122.672085 | 12.5  | 11.9 |       |
| 74 | MTL-9965-10039-B_BH-52  | Roe and Madin, 2013 | 45.478995 | -122.673789 | 15.4  | 9.6  |       |
| 75 | MTL-9965-10039-B_BH-59  | Roe and Madin, 2013 | 45.495505 | -122.670945 | 12.0  | 12.9 |       |
| 76 | MTL-9965-10039-B_BH-84  | Roe and Madin, 2013 | 45.487257 | -122.67336  | 12.7  | 10.5 |       |
| 77 | MTL-9965-10039-B_BH-38  | Roe and Madin, 2013 | 45.49024  | -122.672451 | 12.3  | 5.9  |       |
| 78 | MTL-9965-10039-B_BH-39  | Roe and Madin, 2013 | 45.490858 | -122.672306 | 12.2  | 6.1  |       |
| 79 | MTL-10750-10767_WC6-611 | Roe and Madin, 2013 | 45.509736 | -122.728721 | 209.9 | 10.2 |       |
| 80 | MTL-10801-10805_B-4     | Roe and Madin, 2013 | 45.507096 | -122.708072 | 182.3 | 13.1 |       |
| 81 | MTL-11441-11450_B-1     | Roe and Madin, 2013 | 45.499806 | -122.68484  | 152.4 | 19.2 |       |
| 82 | MTL-11441-11450_B-2     | Roe and Madin, 2013 | 45.500343 | -122.6839   | 139.6 | 13.5 |       |
| 83 | MTL-11441-11450_B-3     | Roe and Madin, 2013 | 45.500561 | -122.683816 | 139.8 | 11.7 |       |

|     |                          |                     |           |             |       |      |       |
|-----|--------------------------|---------------------|-----------|-------------|-------|------|-------|
| 84  | MTL-11441-11450_B-4      | Roe and Madin, 2013 | 45.499583 | -122.684673 | 143.8 | 10.0 |       |
| 85  | MTL-11441-11450_B-5      | Roe and Madin, 2013 | 45.499126 | -122.684835 | 133.6 | 8.0  |       |
| 86  | MTL-11441-11450_B-6      | Roe and Madin, 2013 | 45.499384 | -122.684279 | 122.0 | 8.6  |       |
| 87  | MTL-11441-11450_B-7      | Roe and Madin, 2013 | 45.499728 | -122.684163 | 138.1 | 15.9 |       |
| 88  | MTL-11441-11450_B-8      | Roe and Madin, 2013 | 45.500029 | -122.683967 | 139.7 | 9.5  |       |
| 89  | MTL-11441-11450_B-9      | Roe and Madin, 2013 | 45.500132 | -122.683591 | 140.4 | 9.3  |       |
| 90  | MTL-11441-11450_B-10     | Roe and Madin, 2013 | 45.500333 | -122.683307 | 127.0 | 8.7  |       |
| 91  | MTL-11461-11467_B-5      | Roe and Madin, 2013 | 45.505328 | -122.694257 | 165.9 | 8.9  |       |
| 92  | MTL-11924-11925_B-1      | Roe and Madin, 2013 | 45.479799 | -122.687898 | 131.1 | 7.9  | 84.1  |
| 93  | MTL-11924-11925_B-2      | Roe and Madin, 2013 | 45.479778 | -122.687486 | 132.1 | 10.2 |       |
| 94  | MTL-11924-11925_B-3      | Roe and Madin, 2013 | 45.479635 | -122.687711 | 134.3 | 9.3  |       |
| 95  | MTL-11924-11925_B-4      | Roe and Madin, 2013 | 45.479495 | -122.686918 | 130.2 | 7.0  |       |
| 96  | MTL-1780-1819_B-3        | Roe and Madin, 2013 | 45.530385 | -122.762857 | 225.1 | 17.5 |       |
| 97  | MTL-2112-2178_B-565      | Roe and Madin, 2013 | 45.509824 | -122.737879 | 244.5 | 81.1 |       |
| 98  | MTL-2112-2178_B-570      | Roe and Madin, 2013 | 45.510619 | -122.71738  | 217.5 | 31.9 |       |
| 99  | MTL-2112-2178_B-529      | Roe and Madin, 2013 | 45.510859 | -122.717485 | 218.5 | 21.9 |       |
| 100 | MTL-2112-2178_B-569      | Roe and Madin, 2013 | 45.510652 | -122.719241 | 232.1 | 44.3 |       |
| 101 | MTL-2112-2178_B-551      | Roe and Madin, 2013 | 45.510164 | -122.717197 | 213.1 | 33.5 |       |
| 102 | MTL-2112-2178_B-584I     | Roe and Madin, 2013 | 45.510088 | -122.716865 | 211.2 | 32.0 |       |
| 103 | MTL-2112-2178_B-583I     | Roe and Madin, 2013 | 45.509187 | -122.716708 | 203.7 | 36.6 |       |
| 104 | MTL-2112-2178_B-571      | Roe and Madin, 2013 | 45.510695 | -122.71611  | 211.4 | 21.8 |       |
| 105 | MTL-2112-2178_B-528      | Roe and Madin, 2013 | 45.510883 | -122.716114 | 212.1 | 17.9 |       |
| 106 | MTL-2112-2178_B-527      | Roe and Madin, 2013 | 45.511122 | -122.711541 | 206.9 | 16.7 |       |
| 107 | MTL-2112-2178_B-572      | Roe and Madin, 2013 | 45.510897 | -122.714165 | 213.4 | 29.3 |       |
| 108 | MTL-2112-2178_B-530      | Roe and Madin, 2013 | 45.510182 | -122.722643 | 222.3 | 44.6 | 288.3 |
| 109 | MTL-2112-2178_B-534      | Roe and Madin, 2013 | 45.509296 | -122.736013 | 237.7 | 55.1 |       |
| 110 | MTL-2112-2178_B-566      | Roe and Madin, 2013 | 45.510071 | -122.735191 | 240.3 | 20.5 |       |
| 111 | MTL-2112-2178_B-554      | Roe and Madin, 2013 | 45.509923 | -122.733721 | 225.1 | 18.1 |       |
| 112 | MTL-2112-2178_B-567      | Roe and Madin, 2013 | 45.510267 | -122.730359 | 223.9 | 20.9 |       |
| 113 | MTL-2112-2178_B-532      | Roe and Madin, 2013 | 45.509406 | -122.729465 | 213.2 | 16.6 |       |
| 114 | MTL-2112-2178_B-568      | Roe and Madin, 2013 | 45.510396 | -122.725818 | 209.0 | 32.8 |       |
| 115 | MTL-2112-2178_B-552      | Roe and Madin, 2013 | 45.510322 | -122.727267 | 210.6 | 20.8 |       |
| 116 | MTL-2112-2178_B-553      | Roe and Madin, 2013 | 45.511179 | -122.727324 | 232.1 | 33.6 |       |
| 117 | MTL-8705-8706_TB-101     | Roe and Madin, 2013 | 45.451252 | -122.636312 | 17.7  | 18.0 |       |
| 118 | MTL-8705-8706_TB-102     | Roe and Madin, 2013 | 45.450418 | -122.637218 | 16.3  | 6.2  |       |
| 119 | GT_006115_B-2 (Feb 2006) | Roe and Madin, 2013 | 45.494307 | -122.670369 | 11.2  | 11.8 |       |
| 120 | GT_006567_AT-3           | Roe and Madin, 2013 | 45.498857 | -122.685105 | 132.3 | 13.2 |       |
| 121 | GT_006567_AT-2           | Roe and Madin, 2013 | 45.498952 | -122.685234 | 133.1 | 6.3  |       |
| 122 | GT_006567_B-1            | Roe and Madin, 2013 | 45.498995 | -122.684903 | 130.6 | 5.0  |       |
| 123 | GT_006567_B-3            | Roe and Madin, 2013 | 45.499103 | -122.684644 | 125.8 | 9.3  |       |
| 124 | GT_006572_BORING 5       | Roe and Madin, 2013 | 45.500517 | -122.687505 | 172.2 | 13.7 |       |
| 125 | GT_006572_BORING 6       | Roe and Madin, 2013 | 45.500748 | -122.687413 | 167.3 | 14.3 |       |
| 126 | GT_006573_B-3            | Roe and Madin, 2013 | 45.499041 | -122.686156 | 148.6 | 5.7  |       |
| 127 | GT_006573_B-2            | Roe and Madin, 2013 | 45.499013 | -122.686467 | 146.6 | 6.7  |       |
| 128 | GT_006573_B-1            | Roe and Madin, 2013 | 45.498899 | -122.686666 | 141.7 | 7.0  |       |
| 129 | GT_006573_B-4            | Roe and Madin, 2013 | 45.498767 | -122.68665  | 142.0 | 9.7  |       |
| 130 | GT_006573_B-5            | Roe and Madin, 2013 | 45.498813 | -122.686474 | 138.9 | 12.4 |       |
| 131 | GT_006573_B-8            | Roe and Madin, 2013 | 45.498726 | -122.686532 | 137.5 | 12.6 |       |

|     |                           |                     |           |             |       |       |       |
|-----|---------------------------|---------------------|-----------|-------------|-------|-------|-------|
| 132 | GT_006573_B-9             | Roe and Madin, 2013 | 45.498709 | -122.686293 | 133.8 | 7.3   |       |
| 133 | GT_006573_B-7             | Roe and Madin, 2013 | 45.498795 | -122.686103 | 135.3 | 6.6   |       |
| 134 | GT_006573_B-6             | Roe and Madin, 2013 | 45.498882 | -122.686416 | 140.5 | 10.3  |       |
| 135 | WASH_7691                 | Roe and Madin, 2013 | 45.613006 | -123.002228 | 63.7  | 66.8  |       |
| 136 | WASH_886                  | Roe and Madin, 2013 | 45.602897 | -122.906161 | 134.0 | 16.0  |       |
| 137 | WASH_330                  | Roe and Madin, 2013 | 45.549755 | -122.845108 | 78.0  | 113.1 |       |
| 138 | WASH_6150                 | Roe and Madin, 2013 | 45.577865 | -123.0562   | 54.2  | 261.8 |       |
| 139 | WASH_52537                | Roe and Madin, 2013 | 45.545153 | -123.040608 | 50.6  | 403.6 |       |
| 140 | WASH_5586                 | Roe and Madin, 2013 | 45.54125  | -122.935154 | 58.2  | 325.5 |       |
| 141 | WASH_10694                | Roe and Madin, 2013 | 45.484707 | -123.016882 | 52.3  | 241.6 |       |
| 142 | WASH_51495                | Roe and Madin, 2013 | 45.48572  | -122.918712 | 61.5  | 183.1 |       |
| 143 | WASH_54507                | Roe and Madin, 2013 | 45.480557 | -122.840945 | 76.7  | 31.0  |       |
| 144 | WASH_51903                | Roe and Madin, 2013 | 45.3535   | -122.826139 | 78.7  | 9.2   | 313.9 |
| 145 | WASH_58802                | Roe and Madin, 2013 | 45.357635 | -122.788276 | 104.9 | 9.8   |       |
| 146 | CLAC_14454                | Roe and Madin, 2013 | 45.322831 | -122.826626 | 154.0 | 5.8   | 153.6 |
| 147 | CLAC_4488                 | Roe and Madin, 2013 | 45.317622 | -122.758447 | 71.0  | 109.4 |       |
| 148 | CLAC_50840                | Roe and Madin, 2013 | 45.339648 | -122.689193 | 235.2 | 5.1   | 321.0 |
| 149 | CLAC_3869                 | Roe and Madin, 2013 | 45.359287 | -122.645562 | 178.1 | 21.8  |       |
| 150 | CLAC_3153                 | Roe and Madin, 2013 | 45.377372 | -122.720353 | 55.0  | 95.2  |       |
| 151 | WASH_55008                | Roe and Madin, 2013 | 45.458047 | -122.787059 | 61.6  | 10.1  |       |
| 152 | WASH_55007                | Roe and Madin, 2013 | 45.453449 | -122.787588 | 61.3  | 10.1  |       |
|     | ODOT 16955 (46022)_TB-    |                     |           |             |       |       |       |
| 153 | 112                       | Roe and Madin, 2013 | 45.381496 | -122.751163 | 34.8  | 5.2   |       |
|     | ODOT 16955 (46022)_TB-    |                     |           |             |       |       |       |
| 154 | 110                       | Roe and Madin, 2013 | 45.381406 | -122.751752 | 34.5  | 7.0   |       |
|     | ODOT 16955 (46024)_TB-    |                     |           |             |       |       |       |
| 155 | 122                       | Roe and Madin, 2013 | 45.380047 | -122.753173 | 43.4  | 33.0  |       |
|     | ODOT 16955 (46023)_TB-    |                     |           |             |       |       |       |
| 156 | 111                       | Roe and Madin, 2013 | 45.380889 | -122.752544 | 37.2  | 14.0  |       |
|     | ODOT 16955 (46023)_TB-    |                     |           |             |       |       |       |
| 157 | 115                       | Roe and Madin, 2013 | 45.380969 | -122.752143 | 34.8  | 12.2  |       |
|     | ODOT 16955 (46023)_TB-    |                     |           |             |       |       |       |
| 158 | 121                       | Roe and Madin, 2013 | 45.381198 | -122.752087 | 34.4  | 11.2  |       |
| 159 | GT_003846_B-3             | Roe and Madin, 2013 | 45.494803 | -122.671415 | 12.3  | 17.5  |       |
|     | LOTWP GeoDesign, Raw      |                     |           |             |       |       |       |
| 160 | Water Pipeline 1_HDD-2    | Roe and Madin, 2013 | 45.378919 | -122.619892 | 2.6   | 13.6  |       |
|     | LOTWP GeoDesign, Raw      |                     |           |             |       |       |       |
| 161 | Water Pipeline 1_HDD-3    | Roe and Madin, 2013 | 45.379877 | -122.621267 | 3.5   | 9.2   |       |
|     | LOTWP GeoDesign, Raw      |                     |           |             |       |       |       |
| 162 | Water Pipeline 1_HDD-4    | Roe and Madin, 2013 | 45.380997 | -122.622576 | 3.5   | 7.7   |       |
|     | LOTWP GeoDesign,          |                     |           |             |       |       |       |
| 163 | Willamette R. Crossing_L1 | Roe and Madin, 2013 | 45.377728 | -122.612999 | 12.7  | 42.3  |       |
|     | LOTWP GeoDesign,          |                     |           |             |       |       |       |
|     | Willamette R.             |                     |           |             |       |       |       |
| 164 | Crossing_L3A              | Roe and Madin, 2013 | 45.378817 | -122.616554 | 7.2   | 18.8  |       |
|     | LOTWP GeoDesign,          |                     |           |             |       |       |       |
| 165 | Willamette R. Crossing_L4 | Roe and Madin, 2013 | 45.379451 | -122.617594 | 8.3   | 20.2  |       |
|     | LOTWP GeoDesign,          |                     |           |             |       |       |       |
| 166 | Willamette R. Crossing_L5 | Roe and Madin, 2013 | 45.380081 | -122.618471 | 9.7   | 25.9  | 117.3 |
|     | LOTWP GeoDesign,          |                     |           |             |       |       |       |
| 167 | Willamette R. Crossing_L7 | Roe and Madin, 2013 | 45.384153 | -122.626703 | 20.1  | 28.7  |       |
|     | LOTWP GeoDesign,          |                     |           |             |       |       |       |
|     | Willamette R.             |                     |           |             |       |       |       |
| 168 | Crossing_W12              | Roe and Madin, 2013 | 45.380608 | -122.620288 | 3.5   | 8.4   |       |

|                                   |                     |           |             |      |      |      |
|-----------------------------------|---------------------|-----------|-------------|------|------|------|
| LOTWP GeoDesign,<br>Willamette R. |                     |           |             |      |      |      |
| 169 Crossing_W13                  | Roe and Madin, 2013 | 45.381404 | -122.621996 | 3.5  | 5.6  | 92.7 |
| LOTWP GeoDesign,<br>Willamette R. |                     |           |             |      |      |      |
| 170 Crossing_W14                  | Roe and Madin, 2013 | 45.383261 | -122.623714 | 3.5  | 9.0  |      |
| LOTWP GeoDesign,                  |                     |           |             |      |      |      |
| 171 Willamette R. Crossing_L12    | Roe and Madin, 2013 | 45.386421 | -122.619394 | 37.5 | 36.9 |      |
| LOTWP GeoDesign,                  |                     |           |             |      |      |      |
| 172 Willamette R. Crossing_L13    | Roe and Madin, 2013 | 45.384916 | -122.627175 | 17.3 | 27.0 |      |
| LOTWP GeoDesign,                  |                     |           |             |      |      |      |
| 173 Willamette R. Crossing_L14    | Roe and Madin, 2013 | 45.385082 | -122.630307 | 38.1 | 40.0 |      |
| LOTWP GeoDesign,<br>Willamette R. |                     |           |             |      |      |      |
| 174 Crossing_W19                  | Roe and Madin, 2013 | 45.385343 | -122.623584 | 3.5  | 12.0 |      |
| LOTWP GeoDesign,<br>Willamette R. |                     |           |             |      |      |      |
| 175 Crossing_W20                  | Roe and Madin, 2013 | 45.38519  | -122.624376 | 3.5  | 18.4 |      |
| LOTWP GeoDesign, River            |                     |           |             |      |      |      |
| 176 Intake Pump Sta._CR-8         | Roe and Madin, 2013 | 45.37784  | -122.592574 | 18.0 | 16.2 |      |
| LOTWP GeoDesign,<br>Oswego Lake   |                     |           |             |      |      |      |
| 177 Crossing_FWP-74               | Roe and Madin, 2013 | 45.41102  | -122.669009 | 31.3 | 7.5  | 68.6 |
| LOTWP GeoDesign,<br>Oswego Lake   |                     |           |             |      |      |      |
| 178 Crossing_FWP-75               | Roe and Madin, 2013 | 45.412686 | -122.669025 | 49.1 | 8.6  |      |
| LOTWP GeoDesign,<br>Oswego Lake   |                     |           |             |      |      |      |
| 179 Crossing_FWP-77B              | Roe and Madin, 2013 | 45.414878 | -122.669773 | 31.3 | 9.3  |      |
| LOTWP Kleinfelder,                |                     |           |             |      |      |      |
| 180 KFWP 006-045_KFWP-017         | Roe and Madin, 2013 | 45.415668 | -122.697572 | 47.4 | 5.6  |      |
| 181 Newb 1_B-1                    | Roe and Madin, 2013 | 45.325302 | -122.980989 | 64.2 | 5.4  |      |
| 182 Newb 2_B-1                    | Roe and Madin, 2013 | 45.290111 | -122.964814 | 52.8 | 16.2 |      |
| 183 Newb 2_B-3                    | Roe and Madin, 2013 | 45.290143 | -122.965562 | 52.8 | 17.4 |      |
| 184 Newb 2_B-5                    | Roe and Madin, 2013 | 45.289468 | -122.962733 | 53.2 | 17.3 |      |
| ODOT 19153 (62004)_DH-            |                     |           |             |      |      |      |
| 185 2-01                          | Roe and Madin, 2013 | 45.313631 | -123.007072 | 38.1 | 4.9  |      |
| ODOT 20316 (74140)_TB             |                     |           |             |      |      |      |
| 186 102_1.9-1                     | Roe and Madin, 2013 | 45.632907 | -123.124487 | 60.6 | 30.7 |      |
| ODOT 20751 (81608)_BH-            |                     |           |             |      |      |      |
| 187 1                             | Roe and Madin, 2013 | 45.379398 | -123.095952 | 66.6 | 16.0 |      |
| ODOT 671249 (37435)_TB-           |                     |           |             |      |      |      |
| 188 502                           | Roe and Madin, 2013 | 45.500164 | -123.089824 | 48.9 | 23.9 |      |
| ODOT 671249 (37435)_TB-           |                     |           |             |      |      |      |
| 189 501                           | Roe and Madin, 2013 | 45.499632 | -123.089187 | 49.1 | 24.4 |      |
| ODOT 671258 (39796)_TB-           |                     |           |             |      |      |      |
| 190 502                           | Roe and Madin, 2013 | 45.518879 | -123.130015 | 58.3 | 19.2 |      |
| ODOT 671258 (39796)_TB-           |                     |           |             |      |      |      |
| 191 501                           | Roe and Madin, 2013 | 45.51855  | -123.130234 | 56.6 | 17.3 |      |
| ODOT 10-01137b                    |                     |           |             |      |      |      |
| 192 (46847)_TB-502                | Roe and Madin, 2013 | 45.446849 | -122.643297 | 8.4  | 4.4  | 7.3  |
| ODOT 10-01137b                    |                     |           |             |      |      |      |
| 193 (46847)_TB-501                | Roe and Madin, 2013 | 45.446254 | -122.643199 | 11.7 | 4.0  |      |
| ODOT 205-09671                    |                     |           |             |      |      |      |
| 194 (22975)_Test hole #2mo        | Roe and Madin, 2013 | 45.457514 | -122.784318 | 64.7 | 8.9  |      |

|                            |                     |           |             |      |      |      |
|----------------------------|---------------------|-----------|-------------|------|------|------|
| ODOT 218-09727             |                     |           |             |      |      |      |
| 195 (24876)_Test Hole #1CD | Roe and Madin, 2013 | 45.373641 | -122.586442 | 22.2 | 24.6 |      |
| ODOT 218-09727             |                     |           |             |      |      |      |
| 196 (24876)_Test Hole #2CD | Roe and Madin, 2013 | 45.373054 | -122.586319 | 21.4 | 18.0 |      |
| ODOT 233-09741             |                     |           |             |      |      |      |
| 197 (24120)_Test hole #2   | Roe and Madin, 2013 | 45.372529 | -122.744068 | 56.9 | 13.9 |      |
| ODOT 233-09741             |                     |           |             |      |      |      |
| 198 (24120)_Test hole #3   | Roe and Madin, 2013 | 45.371514 | -122.744037 | 63.3 | 10.9 |      |
| ODOT 233-09741             |                     |           |             |      |      |      |
| 199 (24120)_Test hole #1   | Roe and Madin, 2013 | 45.371148 | -122.744127 | 73.6 | 10.2 |      |
| ODOT 18840 (58455)_BH-     |                     |           |             |      |      |      |
| 200 2                      | Roe and Madin, 2013 | 45.643183 | -122.99226  | 62.6 | 16.9 |      |
| ODOT 18840 (58455)_BH-     |                     |           |             |      |      |      |
| 201 1                      | Roe and Madin, 2013 | 45.643218 | -122.991844 | 63.6 | 16.9 |      |
| ODOT 23-01654a             |                     |           |             |      |      |      |
| 202 (31481)_Test Hole No.2 | Roe and Madin, 2013 | 45.339153 | -122.655516 | 34.6 | 16.0 |      |
| ODOT 48-02376b             |                     |           |             |      |      |      |
| 203 (26627)_Test Hole #1LY | Roe and Madin, 2013 | 45.387339 | -122.751016 | 39.0 | 12.8 |      |
| ODOT 48-02376b             |                     |           |             |      |      |      |
| 204 (26627)_Test Hole #2LY | Roe and Madin, 2013 | 45.387271 | -122.750573 | 36.5 | 11.6 |      |
| ODOT 239-09757             |                     |           |             |      |      |      |
| 205 (24871)_Test Hole #5KS | Roe and Madin, 2013 | 45.384795 | -122.578761 | 23.1 | 8.2  |      |
| ODOT 239-09757             |                     |           |             |      |      |      |
| 206 (24871)_Test Hole #1CH | Roe and Madin, 2013 | 45.384697 | -122.579047 | 23.4 | 10.0 |      |
| ODOT 239-09757             |                     |           |             |      |      |      |
| 207 (24871)_Test Hole #4KS | Roe and Madin, 2013 | 45.38472  | -122.579426 | 23.7 | 7.9  |      |
| ODOT 239-09757             |                     |           |             |      |      |      |
| 208 (24871)_Test Hole #3KS | Roe and Madin, 2013 | 45.384614 | -122.579336 | 23.1 | 10.3 |      |
| ODOT 239-09757             |                     |           |             |      |      |      |
| 209 (24871)_Test Hole #7MO | Roe and Madin, 2013 | 45.384692 | -122.579573 | 31.3 | 12.1 |      |
| ODOT 238-09750             |                     |           |             |      |      |      |
| 210 (24875)_Test Hole #3CD | Roe and Madin, 2013 | 45.37528  | -122.587373 | 23.3 | 25.8 |      |
| ODOT 238-09750             |                     |           |             |      |      |      |
| 211 (24875)_Test Hole #2CD | Roe and Madin, 2013 | 45.374589 | -122.587114 | 23.0 | 8.0  |      |
| ODOT 140-07579a            |                     |           |             |      |      |      |
| 212 (52468)_TB-501         | Roe and Madin, 2013 | 45.335847 | -122.76875  | 87.8 | 24.1 |      |
| ODOT 141-07582a            |                     |           |             |      |      |      |
| 213 (63682)_B-1-02         | Roe and Madin, 2013 | 45.38255  | -122.752533 | 42.0 | 15.2 |      |
| ODOT 203-09669a            |                     |           |             |      |      |      |
| 214 (47845)_TB-526         | Roe and Madin, 2013 | 45.451964 | -122.641331 | 10.9 | 14.5 |      |
| ODOT 203-09669a            |                     |           |             |      |      |      |
| 215 (47845)_TB-527         | Roe and Madin, 2013 | 45.451436 | -122.641389 | 10.9 | 15.1 |      |
| ODOT 203-09669a            |                     |           |             |      |      |      |
| 216 (47845)_TB-529         | Roe and Madin, 2013 | 45.45078  | -122.6416   | 10.7 | 9.4  |      |
| ODOT 203-09669a            |                     |           |             |      |      |      |
| 217 (47845)_TB-528         | Roe and Madin, 2013 | 45.450472 | -122.641647 | 10.7 | 9.2  |      |
| ODOT 203-09669a            |                     |           |             |      |      |      |
| 218 (47846)_TB-521         | Roe and Madin, 2013 | 45.45006  | -122.641606 | 10.8 | 19.0 | 21.9 |
| ODOT 203-09669a            |                     |           |             |      |      |      |
| 219 (47846)_TB-522         | Roe and Madin, 2013 | 45.449687 | -122.641409 | 11.1 | 11.4 |      |
| ODOT 203-09669a            |                     |           |             |      |      |      |
| 220 (47846)_TB-523         | Roe and Madin, 2013 | 45.449433 | -122.641256 | 11.1 | 8.9  |      |
| ODOT 203-09669a            |                     |           |             |      |      |      |
| 221 (47846)_TB-524         | Roe and Madin, 2013 | 45.449157 | -122.640803 | 10.8 | 3.2  |      |
| ODOT 203-09669a            |                     |           |             |      |      |      |
| 222 (47846)_TB-525         | Roe and Madin, 2013 | 45.44894  | -122.640665 | 10.5 | 4.1  |      |
| ODOT 42-02363              |                     |           |             |      |      |      |
| 223 (35837)_Test Hole 7    | Roe and Madin, 2013 | 45.644622 | -123.134474 | 64.6 | 8.6  |      |

|                             |                     |           |             |      |      |  |
|-----------------------------|---------------------|-----------|-------------|------|------|--|
| ODOT 42-02363               |                     |           |             |      |      |  |
| 224 (35837)_Test Hole 81-1  | Roe and Madin, 2013 | 45.644453 | -123.134288 | 64.2 | 26.5 |  |
| ODOT 42-02363               |                     |           |             |      |      |  |
| 225 (35837)_Test Hole 81-2  | Roe and Madin, 2013 | 45.644979 | -123.135412 | 64.9 | 15.0 |  |
| ODOT 29-02054a              |                     |           |             |      |      |  |
| 226 (30336)_Test Hole No.4  | Roe and Madin, 2013 | 45.297227 | -122.987987 | 31.3 | 32.9 |  |
| ODOT 29-02054a              |                     |           |             |      |      |  |
| 227 (30336)_Test Hole No.5  | Roe and Madin, 2013 | 45.296631 | -122.988448 | 43.1 | 24.4 |  |
| ODOT 217-09724              |                     |           |             |      |      |  |
| 228 (24017)_PC-54           | Roe and Madin, 2013 | 45.357581 | -122.618078 | 73.1 | 9.4  |  |
| ODOT 217-09724              |                     |           |             |      |      |  |
| 229 (24017)_PC-58           | Roe and Madin, 2013 | 45.357528 | -122.617555 | 63.5 | 7.7  |  |
| ODOT 217-09724              |                     |           |             |      |      |  |
| 230 (24017)_PC-50           | Roe and Madin, 2013 | 45.35749  | -122.617282 | 68.4 | 7.2  |  |
| ODOT 217-09724              |                     |           |             |      |      |  |
| 231 (24017)_Test Hole 3x    | Roe and Madin, 2013 | 45.357528 | -122.617161 | 69.7 | 7.3  |  |
| ODOT 217-09724              |                     |           |             |      |      |  |
| 232 (24017)_PC-55           | Roe and Madin, 2013 | 45.357533 | -122.618359 | 75.6 | 6.7  |  |
| ODOT 217-09724              |                     |           |             |      |      |  |
| 233 (24017)_PC-53           | Roe and Madin, 2013 | 45.357454 | -122.617136 | 69.1 | 7.3  |  |
| ODOT 217-09724              |                     |           |             |      |      |  |
| 234 (24017)_PC-57           | Roe and Madin, 2013 | 45.357447 | -122.617696 | 64.0 | 7.3  |  |
| ODOT 202-09668              |                     |           |             |      |      |  |
| 235 (23171)_Test hole #4mo. | Roe and Madin, 2013 | 45.449136 | -122.642826 | 5.8  | 12.6 |  |
| Final Data Report - Segment |                     |           |             |      |      |  |
| 236 D_BD-95                 | Roe and Madin, 2013 | 45.446419 | -122.637664 | 16.7 | 4.5  |  |
| Final Data Report - Segment |                     |           |             |      |      |  |
| 237 D_BD-103                | Roe and Madin, 2013 | 45.442116 | -122.639362 | 16.3 | 7.1  |  |
| Final Data Report - Segment |                     |           |             |      |      |  |
| 238 D_BD-105                | Roe and Madin, 2013 | 45.441041 | -122.639907 | 15.0 | 5.9  |  |
| Final Data Report - Segment |                     |           |             |      |      |  |
| 239 D_BD-107                | Roe and Madin, 2013 | 45.439762 | -122.640723 | 11.3 | 14.7 |  |
| Final Data Report - Segment |                     |           |             |      |      |  |
| 240 D_BD-108                | Roe and Madin, 2013 | 45.438987 | -122.640894 | 12.0 | 10.5 |  |
| Final Data Report - Segment |                     |           |             |      |      |  |
| 241 D_BD-109                | Roe and Madin, 2013 | 45.438854 | -122.640997 | 12.7 | 11.8 |  |
| Final Data Report - Segment |                     |           |             |      |      |  |
| 242 D_BD-110                | Roe and Madin, 2013 | 45.438193 | -122.64081  | 14.1 | 11.1 |  |
| Final Data Report - Segment |                     |           |             |      |      |  |
| 243 D_BD-111                | Roe and Madin, 2013 | 45.438043 | -122.640693 | 14.9 | 10.6 |  |
| Final Data Report - Segment |                     |           |             |      |      |  |
| 244 D_BD-112                | Roe and Madin, 2013 | 45.43762  | -122.640379 | 16.5 | 11.0 |  |
| Final Data Report - Segment |                     |           |             |      |      |  |
| 245 D_BD-113                | Roe and Madin, 2013 | 45.437419 | -122.640054 | 16.6 | 9.6  |  |
| Final Data Report - Segment |                     |           |             |      |      |  |
| 246 D_BD-114                | Roe and Madin, 2013 | 45.436787 | -122.639544 | 18.8 | 9.7  |  |
| Final Data Report - Segment |                     |           |             |      |      |  |
| 247 D_BD-115                | Roe and Madin, 2013 | 45.435804 | -122.638885 | 31.1 | 15.3 |  |
| Final Data Report - Segment |                     |           |             |      |      |  |
| 248 D_BD-120                | Roe and Madin, 2013 | 45.4302   | -122.636844 | 44.0 | 7.4  |  |
| Final Data Report - Segment |                     |           |             |      |      |  |
| 249 D_BD-123                | Roe and Madin, 2013 | 45.430065 | -122.634302 | 44.2 | 5.8  |  |
| Final Data Report - Segment |                     |           |             |      |      |  |
| 250 D_BD-168                | Roe and Madin, 2013 | 45.442624 | -122.639951 | 16.4 | 7.0  |  |
| Final Data Report - Segment |                     |           |             |      |      |  |
| 251 D_BD-169                | Roe and Madin, 2013 | 45.441768 | -122.639874 | 16.5 | 6.7  |  |
| Final Data Report - Segment |                     |           |             |      |      |  |
| 252 D_BD-142                | Roe and Madin, 2013 | 45.438429 | -122.640733 | 13.5 | 9.5  |  |

Final Data Report - Segment

|                             |                     |           |             |      |       |
|-----------------------------|---------------------|-----------|-------------|------|-------|
| 253 D_BD-160                | Roe and Madin, 2013 | 45.437836 | -122.640308 | 15.0 | 8.0   |
| Final Data Report - Segment |                     |           |             |      |       |
| 254 D_BD-143                | Roe and Madin, 2013 | 45.43694  | -122.63944  | 17.8 | 6.8   |
| ODOT 141-07582a             |                     |           |             |      |       |
| 255 (63682)_B-2-02          | Roe and Madin, 2013 | 45.382479 | -122.752903 | 41.1 | 15.5  |
| ODOT 141-07582a             |                     |           |             |      |       |
| 256 (63682)_B-3-02          | Roe and Madin, 2013 | 45.382401 | -122.752235 | 41.0 | 13.6  |
| ODOT 201-09638              |                     |           |             |      |       |
| 257 (24881)_Test hole #1mo  | Roe and Madin, 2013 | 45.502102 | -123.116167 | 53.0 | 21.3  |
| ODOT 201-09638              |                     |           |             |      |       |
| 258 (24881)_Test hole #2ly  | Roe and Madin, 2013 | 45.502342 | -123.115851 | 52.5 | 17.2  |
| ODOT 16955 (46024)_TB-      |                     |           |             |      |       |
| 259 113                     | Roe and Madin, 2013 | 45.380536 | -122.752611 | 35.4 | 34.2  |
| 260 HBD 1                   | Wilson, 1997        | 45.542808 | -122.948023 | 63.0 | 432.7 |
| 261 WASH_749                | Roe and Madin, 2013 | 45.416043 | -122.920833 | 44.0 | 32.4  |
| 262 WASH_4308               | Roe and Madin, 2013 | 45.435541 | -122.908372 | 55.8 | 11.0  |
| 263 WASH_602                | Roe and Madin, 2013 | 45.460356 | -122.991337 | 63.6 | 17.0  |
| 264 WASH_12457              | Roe and Madin, 2013 | 45.417562 | -122.989249 | 52.7 | 56.7  |
| 265 WASH_12486              | Roe and Madin, 2013 | 45.413093 | -122.958244 | 61.3 | 90.6  |
| 266 WASH_50346              | Roe and Madin, 2013 | 45.430439 | -122.905002 | 68.2 | 15.2  |
| 267 WASH_66926              | Roe and Madin, 2013 | 45.38187  | -122.79465  | 41.6 | 27.2  |
| 268 WASH_12673              | Roe and Madin, 2013 | 45.392318 | -122.932202 | 54.9 | 39.0  |
| 269 WASH_12585              | Roe and Madin, 2013 | 45.41523  | -122.881563 | 56.3 | 41.1  |
| 270 WASH_12449              | Roe and Madin, 2013 | 45.427267 | -122.975209 | 54.3 | 90.9  |
| 271 WASH_12435              | Roe and Madin, 2013 | 45.420232 | -122.951085 | 38.4 | 67.1  |
| 272 WASH_11815              | Roe and Madin, 2013 | 45.397853 | -122.821597 | 54.0 | 14.7  |
| 273 WASH_11408              | Roe and Madin, 2013 | 45.425448 | -122.76146  | 46.1 | 207.0 |
| 274 WASH_10445              | Roe and Madin, 2013 | 45.446123 | -122.987384 | 55.6 | 74.5  |
| 275 WASH_10411              | Roe and Madin, 2013 | 45.451649 | -122.957196 | 49.2 | 143.1 |
| 276 WASH_10399              | Roe and Madin, 2013 | 45.449491 | -122.964104 | 49.7 | 115.9 |
| 277 WASH_10186              | Roe and Madin, 2013 | 45.470318 | -122.881575 | 72.0 | 76.9  |
| 278 WASH_10351              | Roe and Madin, 2013 | 45.459169 | -122.938544 | 49.2 | 18.4  |
| 279 WASH_10442              | Roe and Madin, 2013 | 45.444787 | -122.982833 | 53.2 | 70.0  |
| 280 WASH_10515              | Roe and Madin, 2013 | 45.43511  | -122.906136 | 56.5 | 28.5  |
| 281 WASH_11507              | Roe and Madin, 2013 | 45.428252 | -122.864478 | 84.0 | 14.8  |
| 282 WASH_11707              | Roe and Madin, 2013 | 45.402316 | -122.769161 | 57.7 | 198.2 |
| 283 WASH_11789              | Roe and Madin, 2013 | 45.395448 | -122.802112 | 42.9 | 169.1 |
| 284 WASH_11823              | Roe and Madin, 2013 | 45.398382 | -122.808065 | 48.9 | 9.3   |
| 285 WASH_12400              | Roe and Madin, 2013 | 45.430857 | -122.905657 | 64.6 | 10.0  |
| 286 WASH_12576              | Roe and Madin, 2013 | 45.416542 | -122.885022 | 56.3 | 91.1  |
| 287 WASH_12578              | Roe and Madin, 2013 | 45.413198 | -122.875016 | 58.3 | 30.6  |
| 288 WASH_12597              | Roe and Madin, 2013 | 45.401766 | -122.884553 | 39.2 | 67.8  |
| 289 WASH_12598              | Roe and Madin, 2013 | 45.391134 | -122.88519  | 76.6 | 13.5  |
| 290 WASH_12602              | Roe and Madin, 2013 | 45.395023 | -122.870561 | 42.6 | 78.9  |
| 291 WASH_12612              | Roe and Madin, 2013 | 45.39901  | -122.890897 | 48.7 | 48.0  |
| 292 WASH_12626              | Roe and Madin, 2013 | 45.398314 | -122.90711  | 55.9 | 99.1  |
| 293 WASH_12627              | Roe and Madin, 2013 | 45.391552 | -122.900549 | 72.3 | 62.2  |
| 294 WASH_12773              | Roe and Madin, 2013 | 45.399047 | -122.978492 | 86.5 | 26.8  |
| 295 WASH_13326              | Roe and Madin, 2013 | 45.422683 | -122.992435 | 55.0 | 30.0  |
| 296 WASH_683                | Roe and Madin, 2013 | 45.423583 | -122.866404 | 79.1 | 6.3   |



|                |                     |           |             |       |       |
|----------------|---------------------|-----------|-------------|-------|-------|
| 297 WASH_8911  | Roe and Madin, 2013 | 45.471039 | -122.85733  | 85.3  | 23.7  |
| 298 WASH_9828  | Roe and Madin, 2013 | 45.477529 | -122.87425  | 68.8  | 232.4 |
| 299 CLAC_3801  | Roe and Madin, 2013 | 45.351483 | -122.683438 | 55.3  | 9.6   |
| 300 CLAC_3854  | Roe and Madin, 2013 | 45.350306 | -122.681019 | 47.2  | 34.1  |
| 301 CLAC_3429  | Roe and Madin, 2013 | 45.361882 | -122.668313 | 48.9  | 24.5  |
| 302 CLAC_3841  | Roe and Madin, 2013 | 45.359432 | -122.661688 | 65.5  | 28.0  |
| 303 CLAC_3237  | Roe and Madin, 2013 | 45.381347 | -122.700439 | 46.0  | 16.8  |
| 304 CLAC_3838  | Roe and Madin, 2013 | 45.350805 | -122.682865 | 55.9  | 20.2  |
| 305 WASH_10114 | Roe and Madin, 2013 | 45.463948 | -122.899084 | 66.2  | 34.5  |
| 306 WASH_10318 | Roe and Madin, 2013 | 45.447923 | -122.92243  | 57.5  | 121.6 |
| 307 WASH_10409 | Roe and Madin, 2013 | 45.449205 | -122.95917  | 48.7  | 135.8 |
| 308 WASH_10496 | Roe and Madin, 2013 | 45.435183 | -122.911514 | 52.0  | 64.8  |
| 309 WASH_10501 | Roe and Madin, 2013 | 45.434996 | -122.91616  | 53.2  | 34.3  |
| 310 WASH_11603 | Roe and Madin, 2013 | 45.409958 | -122.767212 | 61.4  | 60.5  |
| 311 WASH_11870 | Roe and Madin, 2013 | 45.401002 | -122.834045 | 70.7  | 15.8  |
| 312 WASH_11895 | Roe and Madin, 2013 | 45.376062 | -122.815535 | 47.2  | 67.0  |
| 313 WASH_12775 | Roe and Madin, 2013 | 45.397435 | -122.976157 | 54.6  | 12.3  |
| 314 WASH_13017 | Roe and Madin, 2013 | 45.373769 | -122.875086 | 58.5  | 65.5  |
| 315 WASH_51246 | Roe and Madin, 2013 | 45.424432 | -122.807624 | 88.2  | 46.4  |
| 316 WASH_7120  | Roe and Madin, 2013 | 45.614283 | -122.962943 | 73.1  | 51.8  |
| 317 WASH_7114  | Roe and Madin, 2013 | 45.616678 | -122.9649   | 67.6  | 62.7  |
| 318 WASH_7127  | Roe and Madin, 2013 | 45.616054 | -122.965049 | 65.3  | 51.9  |
| 319 WASH_7125  | Roe and Madin, 2013 | 45.614306 | -122.968106 | 56.4  | 68.9  |
| 320 WASH_7126  | Roe and Madin, 2013 | 45.615158 | -122.962913 | 73.0  | 58.7  |
| 321 WASH_7112  | Roe and Madin, 2013 | 45.614658 | -122.963982 | 70.1  | 67.4  |
| 322 WASH_8791  | Roe and Madin, 2013 | 45.497799 | -122.774884 | 110.7 | 197.3 |
| 323 WASH_5213  | Roe and Madin, 2013 | 45.583027 | -122.897233 | 83.5  | 61.5  |
| 324 WASH_4700  | Roe and Madin, 2013 | 45.562071 | -122.834996 | 90.9  | 77.4  |
| 325 WASH_334   | Roe and Madin, 2013 | 45.546291 | -122.81634  | 95.6  | 121.8 |
| 326 WASH_105   | Roe and Madin, 2013 | 45.596994 | -122.946481 | 70.8  | 61.0  |
| 327 WASH_8812  | Roe and Madin, 2013 | 45.485447 | -122.768857 | 77.9  | 212.9 |
| 328 WASH_8799  | Roe and Madin, 2013 | 45.4847   | -122.756014 | 88.2  | 172.0 |
| 329 WASH_9018  | Roe and Madin, 2013 | 45.475339 | -122.755799 | 71.9  | 61.6  |
| 330 WASH_4938  | Roe and Madin, 2013 | 45.525916 | -122.797326 | 105.1 | 222.7 |
| 331 WASH_211   | Roe and Madin, 2013 | 45.545647 | -122.809789 | 96.4  | 42.8  |
| 332 WASH_4827  | Roe and Madin, 2013 | 45.547495 | -122.818823 | 96.0  | 116.4 |
| 333 WASH_60848 | Roe and Madin, 2013 | 45.544721 | -122.816051 | 89.6  | 127.7 |
| 334 WASH_4767  | Roe and Madin, 2013 | 45.551841 | -122.81728  | 89.6  | 117.6 |
| 335 WASH_4782  | Roe and Madin, 2013 | 45.555405 | -122.80964  | 83.2  | 56.9  |
| 336 MULT_757   | Roe and Madin, 2013 | 45.580258 | -122.820391 | 98.4  | 42.9  |
| 337 MULT_79334 | Roe and Madin, 2013 | 45.581397 | -122.82625  | 98.0  | 11.5  |
| 338 WASH_3878  | Roe and Madin, 2013 | 45.61606  | -122.966861 | 59.3  | 68.4  |
| 339 WASH_4629  | Roe and Madin, 2013 | 45.571023 | -122.838544 | 107.6 | 55.2  |
| 340 WASH_4645  | Roe and Madin, 2013 | 45.572333 | -122.837507 | 101.8 | 75.3  |
| 341 WASH_4717  | Roe and Madin, 2013 | 45.55715  | -122.816117 | 100.7 | 62.9  |
| 342 WASH_4775  | Roe and Madin, 2013 | 45.555438 | -122.820648 | 102.7 | 112.1 |
| 343 WASH_4790  | Roe and Madin, 2013 | 45.555343 | -122.81868  | 95.5  | 116.5 |
| 344 WASH_4813  | Roe and Madin, 2013 | 45.547053 | -122.811925 | 102.1 | 105.4 |

|     |                         |                     |           |             |       |       |      |
|-----|-------------------------|---------------------|-----------|-------------|-------|-------|------|
| 345 | WASH_4824               | Roe and Madin, 2013 | 45.547705 | -122.816279 | 100.9 | 112.8 |      |
| 346 | WASH_5013               | Roe and Madin, 2013 | 45.595561 | -122.907919 | 103.0 | 30.5  |      |
| 347 | WASH_5031               | Roe and Madin, 2013 | 45.594485 | -122.906157 | 93.6  | 26.6  |      |
| 348 | WASH_5074               | Roe and Madin, 2013 | 45.598345 | -122.91717  | 85.5  | 43.1  |      |
| 349 | WASH_5119               | Roe and Madin, 2013 | 45.595296 | -122.930127 | 79.9  | 45.4  |      |
| 350 | WASH_5175               | Roe and Madin, 2013 | 45.583729 | -122.936919 | 66.8  | 80.8  |      |
| 351 | WASH_5188               | Roe and Madin, 2013 | 45.58986  | -122.925713 | 75.0  | 59.7  |      |
| 352 | WASH_5214               | Roe and Madin, 2013 | 45.582512 | -122.899885 | 82.6  | 70.1  |      |
| 353 | WASH_9953               | Roe and Madin, 2013 | 45.545497 | -122.816897 | 94.0  | 136.9 |      |
| 354 | WASH_54800              | Roe and Madin, 2013 | 45.619255 | -122.990859 | 109.5 | 51.8  |      |
| 355 | MULT_861                | Roe and Madin, 2013 | 45.552944 | -122.780809 | 323.1 | 55.5  |      |
| 356 | MULT_92487              | Roe and Madin, 2013 | 45.549051 | -122.767663 | 337.5 | 25.4  |      |
| 357 | O-95-07_GSD1            | Roe and Madin, 2013 | 45.380577 | -122.602093 | 18.4  | 21.1  |      |
| 358 | O-95-07_GSD3            | Roe and Madin, 2013 | 45.398584 | -122.593113 | 99.5  | 25.4  |      |
| 359 | O-95-07_LOP1            | Roe and Madin, 2013 | 45.382197 | -122.634219 | 56.0  | 11.6  |      |
| 360 | O-95-07_LOD6            | Roe and Madin, 2013 | 45.417595 | -122.632827 | 65.6  | 36.7  | 97.5 |
| 361 | O-95-07_BVPI            | Roe and Madin, 2013 | 45.406516 | -122.794855 | 62.8  | 13.4  |      |
| 362 | Source: Terrance Conlon | Wells et al., 2020a | 45.593057 | -123.156467 | 52.2  | 8.7   |      |
| 363 | Source: Terrance Conlon | Wells et al., 2020a | 45.484519 | -123.059823 | 63.5  | 75.1  |      |
| 364 | Source: Terrance Conlon | Wells et al., 2020a | 45.475006 | -123.064445 | 60.5  | 87.9  |      |
| 365 | Source: Terrance Conlon | Wells et al., 2020a | 45.471326 | -122.894995 | 64.9  | 195.7 |      |
| 366 | Source: Terrance Conlon | Wells et al., 2020a | 45.461267 | -122.930901 | 53.8  | 30.6  |      |
| 367 | 1S3W_24-3               | Wilson, 1997        | 45.466059 | -122.998637 | 53.8  | 47.7  |      |
| 368 | 1S3W_25-2               | Wilson, 1997        | 45.447931 | -122.990761 | 55.9  | 45.0  |      |
| 369 | 1S3W_25-3               | Wilson, 1997        | 45.451634 | -122.992576 | 57.9  | 12.1  |      |
| 370 | 2S3W_1-2                | Wilson, 1997        | 45.430253 | -122.990934 | 55.2  | 86.0  |      |
| 371 | 1S2W_15-10              | Wilson, 1997        | 45.486123 | -122.915162 | 63.0  | 176.4 |      |
| 372 | 1S2W_19-5               | Wilson, 1997        | 45.475095 | -122.973633 | 56.7  | 249.6 |      |
| 373 | 1S2W_20-1               | Wilson, 1997        | 45.464748 | -122.962135 | 56.0  | 45.3  |      |
| 374 | 1S2W_20-2               | Wilson, 1997        | 45.464866 | -122.956211 | 54.5  | 50.0  |      |
| 375 | 1S2W_20-3               | Wilson, 1997        | 45.463123 | -122.964625 | 56.3  | 14.2  |      |
| 376 | 1S2W_21-4               | Wilson, 1997        | 45.466016 | -122.934158 | 49.1  | 83.5  |      |
| 377 | 1S2W_22-3               | Wilson, 1997        | 45.468757 | -122.910274 | 59.0  | 116.9 |      |
| 378 | 1S2W_22-5               | Wilson, 1997        | 45.462628 | -122.915972 | 58.1  | 56.6  |      |
| 379 | 1S2W_22-7               | Wilson, 1997        | 45.467359 | -122.908402 | 60.1  | 109.8 |      |
| 380 | 1S2W_23-8               | Wilson, 1997        | 45.470633 | -122.900105 | 61.6  | 200.3 |      |
| 381 | 1S2W_23-9               | Wilson, 1997        | 45.464378 | -122.89747  | 65.3  | 11.6  |      |
| 382 | 1S2W_23-10              | Wilson, 1997        | 45.470583 | -122.898187 | 59.3  | 200.2 |      |
| 383 | 1S2W_23-12              | Wilson, 1997        | 45.470692 | -122.896519 | 64.7  | 185.4 |      |
| 384 | 1S2W_23-14              | Wilson, 1997        | 45.463295 | -122.897035 | 70.8  | 15.6  |      |
| 385 | 1S2W_23-17              | Wilson, 1997        | 45.468281 | -122.892163 | 71.9  | 50.6  |      |
| 386 | 1S2W_24-2               | Wilson, 1997        | 45.470001 | -122.880315 | 70.9  | 24.0  |      |
| 387 | 1S2W_24-3               | Wilson, 1997        | 45.470473 | -122.880746 | 70.7  | 31.6  |      |
| 388 | 1S2W_24-4               | Wilson, 1997        | 45.47226  | -122.879166 | 64.3  | 41.7  |      |
| 389 | 1S2W_24-5               | Wilson, 1997        | 45.469811 | -122.877172 | 68.6  | 25.6  |      |
| 390 | 1S2W_24-7               | Wilson, 1997        | 45.470341 | -122.878718 | 67.3  | 17.0  |      |
| 391 | 1S2W_24-8               | Wilson, 1997        | 45.468891 | -122.884268 | 75.6  | 16.8  |      |
| 392 | 1S2W_24-9               | Wilson, 1997        | 45.470921 | -122.879875 | 66.7  | 31.0  |      |

|                 |              |           |             |      |       |
|-----------------|--------------|-----------|-------------|------|-------|
| 393 1S2W_24-13  | Wilson, 1997 | 45.470375 | -122.880286 | 70.0 | 38.3  |
| 394 1S2W_26-1   | Wilson, 1997 | 45.460213 | -122.903633 | 65.6 | 73.2  |
| 395 1S2W_26-2   | Wilson, 1997 | 45.460007 | -122.906688 | 62.6 | 126.0 |
| 396 1S2W_26-4   | Wilson, 1997 | 45.460832 | -122.904728 | 63.3 | 116.6 |
| 397 1S2W_26-5   | Wilson, 1997 | 45.461332 | -122.904973 | 61.2 | 130.7 |
| 398 1S2W_26-6   | Wilson, 1997 | 45.460917 | -122.903934 | 63.3 | 85.8  |
| 399 1S2W_26-9   | Wilson, 1997 | 45.460618 | -122.902264 | 66.2 | 14.4  |
| 400 1S2W_26-11  | Wilson, 1997 | 45.460259 | -122.907157 | 62.8 | 124.7 |
| 401 1S2W_27-1   | Wilson, 1997 | 45.461339 | -122.908458 | 60.3 | 121.9 |
| 402 1S2W_27-2   | Wilson, 1997 | 45.46088  | -122.911237 | 61.3 | 127.5 |
| 403 1S2W_27-3   | Wilson, 1997 | 45.460374 | -122.909324 | 62.2 | 124.1 |
| 404 1S2W_27-4   | Wilson, 1997 | 45.460411 | -122.907742 | 62.5 | 148.2 |
| 405 1S2W_27-6   | Wilson, 1997 | 45.45189  | -122.922831 | 53.6 | 16.7  |
| 406 1S2W_27     | Wilson, 1997 | 45.447957 | -122.922213 | 57.2 | 84.0  |
| 407 1S2W_27-8   | Wilson, 1997 | 45.448239 | -122.920001 | 58.2 | 56.1  |
| 408 1S2W_27-9   | Wilson, 1997 | 45.448659 | -122.923098 | 57.0 | 73.8  |
| 409 1S2W_27-11  | Wilson, 1997 | 45.449319 | -122.924613 | 56.4 | 80.7  |
| 410 1S2W_27-12  | Wilson, 1997 | 45.450645 | -122.917508 | 59.4 | 52.7  |
| 411 1S2W_27-14  | Wilson, 1997 | 45.460868 | -122.907847 | 61.6 | 133.8 |
| 412 1S2W_27-16  | Wilson, 1997 | 45.455885 | -122.908859 | 56.7 | 91.1  |
| 413 1S2W_27-17  | Wilson, 1997 | 45.451662 | -122.913945 | 60.6 | 58.2  |
| 414 1S2W_27-21  | Wilson, 1997 | 45.450021 | -122.916366 | 59.6 | 22.1  |
| 415 1S2W_027-22 | Wilson, 1997 | 45.454328 | -122.918904 | 61.2 | 110.3 |
| 416 1S2W_27-23  | Wilson, 1997 | 45.449538 | -122.922123 | 54.0 | 91.5  |
| 417 1S2W_27-24  | Wilson, 1997 | 45.451238 | -122.909204 | 68.3 | 14.3  |
| 418 1S2W_28-3   | Wilson, 1997 | 45.458556 | -122.937318 | 50.9 | 21.9  |
| 419 1S2W_28-4   | Wilson, 1997 | 45.454785 | -122.934183 | 54.1 | 20.3  |
| 420 1S2W_28-5   | Wilson, 1997 | 45.461435 | -122.937003 | 51.8 | 38.6  |
| 421 1S2W_28-6   | Wilson, 1997 | 45.455497 | -122.931693 | 54.1 | 22.1  |
| 422 1S2W_28-11  | Wilson, 1997 | 45.459709 | -122.936352 | 50.7 | 15.7  |
| 423 1S2W_28-12  | Wilson, 1997 | 45.458113 | -122.936559 | 51.7 | 20.3  |
| 424 1S2W_28-13  | Wilson, 1997 | 45.461385 | -122.935452 | 49.4 | 1.8   |
| 425 1S2W_28-14  | Wilson, 1997 | 45.456012 | -122.932398 | 54.3 | 25.0  |
| 426 1S2W_28-16  | Wilson, 1997 | 45.45778  | -122.932599 | 54.2 | 19.4  |
| 427 1S2W_28-17  | Wilson, 1997 | 45.456792 | -122.934903 | 53.5 | 19.7  |
| 428 1S2W_29-1   | Wilson, 1997 | 45.450976 | -122.951185 | 41.4 | 125.8 |
| 429 1S2W_29-2   | Wilson, 1997 | 45.451632 | -122.9561   | 48.0 | 138.9 |
| 430 1S2W_29-3   | Wilson, 1997 | 45.449585 | -122.963021 | 50.2 | 114.2 |
| 431 1S2W_29-4   | Wilson, 1997 | 45.453838 | -122.958245 | 51.4 | 80.4  |
| 432 1S2W_29-6   | Wilson, 1997 | 45.451506 | -122.964633 | 52.0 | 82.2  |
| 433 1S2W_29-8   | Wilson, 1997 | 45.451339 | -122.965216 | 51.0 | 92.8  |
| 434 1S2W_29-10  | Wilson, 1997 | 45.449878 | -122.957381 | 47.1 | 121.8 |
| 435 1S2W_29-11  | Wilson, 1997 | 45.448407 | -122.968343 | 48.6 | 114.1 |
| 436 1S2W_30-1   | Wilson, 1997 | 45.450269 | -122.989563 | 56.4 | 43.6  |
| 437 1S2W_30-2   | Wilson, 1997 | 45.449968 | -122.969087 | 51.6 | 105.0 |
| 438 1S2W_30-3   | Wilson, 1997 | 45.448929 | -122.97388  | 47.5 | 84.1  |
| 439 1S2W_30-7   | Wilson, 1997 | 45.449348 | -122.98357  | 56.1 | 46.4  |
| 440 1S2W_30-13  | Wilson, 1997 | 45.447943 | -122.984848 | 56.9 | 70.3  |

|                |              |           |             |      |       |
|----------------|--------------|-----------|-------------|------|-------|
| 441 1S2W_31-1  | Wilson, 1997 | 45.437545 | -122.976888 | 51.8 | 92.7  |
| 442 1S2W_31-3  | Wilson, 1997 | 45.446235 | -122.986196 | 56.3 | 73.9  |
| 443 1S2W_31-4  | Wilson, 1997 | 45.437446 | -122.988372 | 61.4 | 29.4  |
| 444 1S2W_31-5  | Wilson, 1997 | 45.444777 | -122.979834 | 54.4 | 85.8  |
| 445 1S2W_31-6  | Wilson, 1997 | 45.43779  | -122.977466 | 53.6 | 97.8  |
| 446 1S2W_31-7  | Wilson, 1997 | 45.44709  | -122.96905  | 40.0 | 96.4  |
| 447 1S2W_31-8  | Wilson, 1997 | 45.435665 | -122.989332 | 58.3 | 28.1  |
| 448 1S2W_31-9  | Wilson, 1997 | 45.435852 | -122.97446  | 52.2 | 128.7 |
| 449 1S2W_31-11 | Wilson, 1997 | 45.441512 | -122.985209 | 55.8 | 94.8  |
| 450 1S2W_31-12 | Wilson, 1997 | 45.445771 | -122.980207 | 54.8 | 82.5  |
| 451 1S2W_31-13 | Wilson, 1997 | 45.441187 | -122.982074 | 54.3 | 110.4 |
| 452 1S2W_31-14 | Wilson, 1997 | 45.434204 | -122.971837 | 51.6 | 140.9 |
| 453 1S2W_31-15 | Wilson, 1997 | 45.438543 | -122.98609  | 59.8 | 52.2  |
| 454 1S2W_31-16 | Wilson, 1997 | 45.439407 | -122.985995 | 58.1 | 46.5  |
| 455 1S2W_31-17 | Wilson, 1997 | 45.435547 | -122.988482 | 57.5 | 55.1  |
| 456 1S2W_31-19 | Wilson, 1997 | 45.445935 | -122.985578 | 55.9 | 74.2  |
| 457 1S2W_31-20 | Wilson, 1997 | 45.446597 | -122.986666 | 56.4 | 73.8  |
| 458 1S2W_31-21 | Wilson, 1997 | 45.433144 | -122.989725 | 57.0 | 87.8  |
| 459 1S2W_31-22 | Wilson, 1997 | 45.43567  | -122.972962 | 43.8 | 124.9 |
| 460 1S2W_32-2  | Wilson, 1997 | 45.443548 | -122.949184 | 47.6 | 62.9  |
| 461 1S2W_32-3  | Wilson, 1997 | 45.437617 | -122.950576 | 47.0 | 99.5  |
| 462 1S2W_32-5  | Wilson, 1997 | 45.441902 | -122.950775 | 45.4 | 114.0 |
| 463 1S2W_33-1  | Wilson, 1997 | 45.447247 | -122.928131 | 51.5 | 67.9  |
| 464 1S2W_33-3  | Wilson, 1997 | 45.443565 | -122.947268 | 50.0 | 86.6  |
| 465 1S2W_33-4  | Wilson, 1997 | 45.433421 | -122.940472 | 49.2 | 69.1  |
| 466 1S2W_33-5  | Wilson, 1997 | 45.44181  | -122.935925 | 53.3 | 150.8 |
| 467 1S2W_33-6  | Wilson, 1997 | 45.435642 | -122.944913 | 51.6 | 91.8  |
| 468 1S2W_34-2  | Wilson, 1997 | 45.435415 | -122.910848 | 53.2 | 30.9  |
| 469 1S2W_34-3  | Wilson, 1997 | 45.437678 | -122.91828  | 52.9 | 53.5  |
| 470 1S2W_34-4  | Wilson, 1997 | 45.447583 | -122.924198 | 57.4 | 132.1 |
| 471 1S2W_34-5  | Wilson, 1997 | 45.437792 | -122.916863 | 54.4 | 26.6  |
| 472 1S2W_35-1  | Wilson, 1997 | 45.435589 | -122.894729 | 60.9 | 13.0  |
| 473 1S2W_35-2  | Wilson, 1997 | 45.43555  | -122.907662 | 55.1 | 15.5  |
| 474 1S2W_35-4  | Wilson, 1997 | 45.442363 | -122.907371 | 68.5 | 12.5  |
| 475 1S2W_35-5  | Wilson, 1997 | 45.433825 | -122.902572 | 55.0 | 22.4  |
| 476 1S2W_36-1  | Wilson, 1997 | 45.435554 | -122.884683 | 69.3 | 26.6  |
| 477 2S2W_1-1   | Wilson, 1997 | 45.419601 | -122.876085 | 75.9 | 9.2   |
| 478 2S2W_1-2   | Wilson, 1997 | 45.419262 | -122.877322 | 73.1 | 12.2  |
| 479 2S2W_1-3   | Wilson, 1997 | 45.423978 | -122.877209 | 84.2 | 5.0   |
| 480 2S2W_1-4   | Wilson, 1997 | 45.427529 | -122.8723   | 85.2 | 2.6   |
| 481 2S2W_01-6  | Wilson, 1997 | 45.421518 | -122.882094 | 74.2 | 2.6   |
| 482 2S2W_2-1   | Wilson, 1997 | 45.430284 | -122.903523 | 68.7 | 9.8   |
| 483 2S2W_2-2   | Wilson, 1997 | 45.42908  | -122.9029   | 80.1 | 22.1  |
| 484 2S2W_2-3   | Wilson, 1997 | 45.429621 | -122.893898 | 72.4 | 10.5  |
| 485 2S2W_02-4  | Wilson, 1997 | 45.419153 | -122.900782 | 52.2 | 50.1  |
| 486 2S2W_3-1   | Wilson, 1997 | 45.423677 | -122.915127 | 65.0 | 6.2   |
| 487 2S2W_03-3  | Wilson, 1997 | 45.421741 | -122.908759 | 57.5 | 6.3   |
| 488 2S2W_4-1   | Wilson, 1997 | 45.421287 | -122.933339 | 45.3 | 27.6  |

|               |              |           |             |      |       |
|---------------|--------------|-----------|-------------|------|-------|
| 489 2S2W_4-2  | Wilson, 1997 | 45.419327 | -122.929571 | 44.1 | 44.7  |
| 490 2S2W_4-3  | Wilson, 1997 | 45.422365 | -122.93714  | 39.6 | 27.1  |
| 491 2S2W_4-4  | Wilson, 1997 | 45.421871 | -122.936977 | 44.0 | 45.6  |
| 492 2S2W_4-5  | Wilson, 1997 | 45.420524 | -122.930584 | 45.2 | 41.6  |
| 493 2S2W_4-6  | Wilson, 1997 | 45.429621 | -122.937664 | 55.9 | 8.7   |
| 494 2S2W_5-2  | Wilson, 1997 | 45.421459 | -122.958321 | 44.5 | 70.4  |
| 495 2S2W_5-3  | Wilson, 1997 | 45.421165 | -122.957244 | 44.3 | 51.9  |
| 496 2S2W_5-5  | Wilson, 1997 | 45.425134 | -122.95855  | 42.9 | 39.8  |
| 497 2S2W_5-6  | Wilson, 1997 | 45.42402  | -122.962834 | 44.3 | 30.6  |
| 498 2S2W_6-1  | Wilson, 1997 | 45.43255  | -122.989432 | 58.3 | 69.6  |
| 499 2S2W_6-2  | Wilson, 1997 | 45.419042 | -122.984202 | 55.2 | 66.8  |
| 500 2S2W_6-3  | Wilson, 1997 | 45.418845 | -122.97557  | 62.7 | 14.5  |
| 501 2S2W_6-4  | Wilson, 1997 | 45.423339 | -122.986026 | 56.6 | 76.7  |
| 502 2S2W_6-5  | Wilson, 1997 | 45.421433 | -122.986495 | 50.3 | 57.9  |
| 503 2S2W_6-6  | Wilson, 1997 | 45.427379 | -122.974022 | 55.3 | 87.3  |
| 504 2S2W_6-7  | Wilson, 1997 | 45.427631 | -122.9893   | 46.7 | 65.0  |
| 505 2S2W_6-8  | Wilson, 1997 | 45.432077 | -122.971276 | 49.8 | 40.6  |
| 506 2S2W_6-9  | Wilson, 1997 | 45.431331 | -122.970444 | 42.3 | 40.8  |
| 507 2S2W_7-1  | Wilson, 1997 | 45.418093 | -122.988175 | 52.5 | 19.6  |
| 508 2S2W_7-2  | Wilson, 1997 | 45.40823  | -122.982226 | 94.4 | 34.7  |
| 509 2S2W_7-4  | Wilson, 1997 | 45.418161 | -122.989188 | 55.1 | 17.0  |
| 510 2S2W_7-6  | Wilson, 1997 | 45.416833 | -122.989738 | 53.8 | 17.8  |
| 511 2S2W_8-1  | Wilson, 1997 | 45.412568 | -122.958695 | 61.0 | 78.4  |
| 512 2S2W_8-2  | Wilson, 1997 | 45.412079 | -122.95767  | 61.8 | 75.5  |
| 513 2S2W_8-3  | Wilson, 1997 | 45.410291 | -122.958807 | 59.4 | 47.5  |
| 514 2S2W_8-5  | Wilson, 1997 | 45.418418 | -122.96156  | 54.1 | 69.9  |
| 515 2S2W_8-6  | Wilson, 1997 | 45.416357 | -122.959453 | 59.0 | 73.9  |
| 516 2S2W_8-7  | Wilson, 1997 | 45.410812 | -122.952393 | 59.7 | 74.0  |
| 517 2S2W_8-8  | Wilson, 1997 | 45.416093 | -122.953353 | 41.7 | 65.5  |
| 518 2S2W_8-9  | Wilson, 1997 | 45.417455 | -122.966413 | 56.0 | 75.5  |
| 519 2S2W_8-10 | Wilson, 1997 | 45.407676 | -122.958416 | 58.6 | 52.8  |
| 520 2S2W_8-11 | Wilson, 1997 | 45.407058 | -122.951829 | 56.3 | 63.0  |
| 521 2S2W_8-12 | Wilson, 1997 | 45.417109 | -122.953037 | 39.9 | 54.9  |
| 522 2S2W_8-13 | Wilson, 1997 | 45.406529 | -122.954104 | 57.8 | 76.7  |
| 523 2S2W_8-14 | Wilson, 1997 | 45.413113 | -122.958707 | 61.2 | 85.6  |
| 524 2S2W_8-15 | Wilson, 1997 | 45.411024 | -122.962889 | 57.1 | 63.8  |
| 525 2S2W_8-17 | Wilson, 1997 | 45.417639 | -122.959556 | 57.6 | 68.2  |
| 526 2S2W_8-18 | Wilson, 1997 | 45.411763 | -122.949835 | 57.4 | 68.7  |
| 527 2S2W_8-19 | Wilson, 1997 | 45.404952 | -122.968094 | 52.5 | 4.4   |
| 528 2S2W_8-20 | Wilson, 1997 | 45.415439 | -122.964758 | 59.1 | 64.6  |
| 529 2S2W_8-21 | Wilson, 1997 | 45.412424 | -122.965761 | 58.5 | 47.8  |
| 530 2S2W_9-1  | Wilson, 1997 | 45.404728 | -122.941679 | 56.8 | 112.9 |
| 531 2S2W_9-2  | Wilson, 1997 | 45.418586 | -122.929875 | 38.9 | 39.5  |
| 532 2S2W_9-3  | Wilson, 1997 | 45.413114 | -122.94568  | 45.2 | 82.6  |
| 533 2S2W_9-4  | Wilson, 1997 | 45.413247 | -122.944676 | 38.9 | 87.1  |
| 534 2S2W_9-5  | Wilson, 1997 | 45.417971 | -122.94546  | 39.1 | 72.3  |
| 535 2S2W_9-6  | Wilson, 1997 | 45.406267 | -122.943748 | 56.8 | 79.6  |
| 536 2S2W_9-7  | Wilson, 1997 | 45.405749 | -122.948428 | 49.0 | 61.2  |

|                |              |           |             |      |       |
|----------------|--------------|-----------|-------------|------|-------|
| 537 2S2W_9-8   | Wilson, 1997 | 45.416479 | -122.934619 | 42.3 | 77.3  |
| 538 2S2W_9-10  | Wilson, 1997 | 45.408152 | -122.944594 | 58.9 | 91.8  |
| 539 2S2W_9-11  | Wilson, 1997 | 45.407245 | -122.944584 | 58.8 | 86.6  |
| 540 2S2W_9-12  | Wilson, 1997 | 45.410089 | -122.94828  | 58.4 | 69.1  |
| 541 2S2W_9-13  | Wilson, 1997 | 45.418668 | -122.930918 | 43.9 | 68.2  |
| 542 2S2W_9-16  | Wilson, 1997 | 45.410691 | -122.948627 | 57.9 | 74.4  |
| 543 2S2W_9-17  | Wilson, 1997 | 45.417499 | -122.931178 | 40.4 | 41.0  |
| 544 2S2W_10-1  | Wilson, 1997 | 45.418417 | -122.92316  | 45.0 | 47.2  |
| 545 2S2W_10-3  | Wilson, 1997 | 45.40682  | -122.912987 | 38.3 | 76.4  |
| 546 2S2W_10-4  | Wilson, 1997 | 45.405857 | -122.924415 | 46.3 | 167.3 |
| 547 2S2W_10-5  | Wilson, 1997 | 45.408566 | -122.921357 | 46.5 | 86.1  |
| 548 2S2W_10-6  | Wilson, 1997 | 45.408726 | -122.915831 | 43.9 | 89.4  |
| 549 2S2W_10-7  | Wilson, 1997 | 45.408694 | -122.920461 | 43.8 | 95.6  |
| 550 2S2W_10-8  | Wilson, 1997 | 45.409264 | -122.920116 | 42.8 | 74.8  |
| 551 2S2W_10-9  | Wilson, 1997 | 45.410172 | -122.921355 | 43.3 | 82.9  |
| 552 2S2W_10-10 | Wilson, 1997 | 45.405484 | -122.922223 | 50.2 | 156.9 |
| 553 2S2W_10-12 | Wilson, 1997 | 45.416994 | -122.920117 | 44.9 | 29.3  |
| 554 2S2W_10-13 | Wilson, 1997 | 45.403992 | -122.925476 | 53.5 | 121.7 |
| 555 2S2W_10-14 | Wilson, 1997 | 45.408159 | -122.91336  | 42.5 | 92.2  |
| 556 2S2W_10-15 | Wilson, 1997 | 45.408069 | -122.91652  | 43.2 | 91.9  |
| 557 2S2W_10-16 | Wilson, 1997 | 45.410656 | -122.921353 | 41.7 | 77.1  |
| 558 2S2W_10-17 | Wilson, 1997 | 45.409204 | -122.921384 | 45.5 | 91.2  |
| 559 2S2W_11-1  | Wilson, 1997 | 45.40602  | -122.907016 | 43.9 | 105.8 |
| 560 2S2W_11-3  | Wilson, 1997 | 45.418317 | -122.891687 | 54.8 | 30.4  |
| 561 2S2W_11-4  | Wilson, 1997 | 45.418495 | -122.89543  | 54.2 | 30.4  |
| 562 2S2W_11-6  | Wilson, 1997 | 45.418375 | -122.888037 | 57.6 | 27.1  |
| 563 2S2W_12-1  | Wilson, 1997 | 45.411325 | -122.882105 | 49.7 | 62.5  |
| 564 2S2W_12-2  | Wilson, 1997 | 45.408236 | -122.878359 | 48.9 | 134.3 |
| 565 2S2W_12-3  | Wilson, 1997 | 45.415188 | -122.880189 | 57.6 | 28.1  |
| 566 2S2W_12-4  | Wilson, 1997 | 45.406742 | -122.878859 | 46.7 | 65.6  |
| 567 2S2W_12-5  | Wilson, 1997 | 45.410435 | -122.874944 | 53.5 | 31.5  |
| 568 2S2W_12-7  | Wilson, 1997 | 45.413583 | -122.882573 | 53.5 | 58.1  |
| 569 2S2W_12-8  | Wilson, 1997 | 45.408929 | -122.875343 | 39.9 | 51.5  |
| 570 2S2W_12-11 | Wilson, 1997 | 45.418322 | -122.880862 | 62.2 | 36.5  |
| 571 2S2W_12-12 | Wilson, 1997 | 45.415201 | -122.881722 | 56.0 | 34.9  |
| 572 2S2W_12-13 | Wilson, 1997 | 45.414915 | -122.875382 | 61.9 | 30.8  |
| 573 2S2W_13-1  | Wilson, 1997 | 45.40357  | -122.881549 | 38.4 | 42.1  |
| 574 2S2W_13-2  | Wilson, 1997 | 45.389722 | -122.875042 | 53.7 | 11.6  |
| 575 2S2W_14-1  | Wilson, 1997 | 45.401392 | -122.890222 | 38.3 | 41.3  |
| 576 2S2W_14-3  | Wilson, 1997 | 45.401023 | -122.906665 | 55.2 | 100.0 |
| 577 2S2W_14-4  | Wilson, 1997 | 45.396673 | -122.904699 | 39.9 | 40.5  |
| 578 2S2W_14-5  | Wilson, 1997 | 45.40041  | -122.889785 | 39.0 | 32.9  |
| 579 2S2W_14-6  | Wilson, 1997 | 45.400822 | -122.892755 | 45.4 | 56.7  |
| 580 2S2W_14-7  | Wilson, 1997 | 45.39266  | -122.906544 | 58.1 | 11.8  |
| 581 2S2W_14-8  | Wilson, 1997 | 45.401647 | -122.904809 | 34.4 | 66.1  |
| 582 2S2W_14-10 | Wilson, 1997 | 45.400977 | -122.888778 | 37.5 | 36.3  |
| 583 2S2W_15-2  | Wilson, 1997 | 45.394229 | -122.916842 | 57.8 | 22.8  |
| 584 2S2W_15-3  | Wilson, 1997 | 45.394962 | -122.908179 | 56.5 | 46.8  |

|                |              |           |             |      |       |
|----------------|--------------|-----------|-------------|------|-------|
| 585 2S2W_15-4  | Wilson, 1997 | 45.398303 | -122.918584 | 54.6 | 97.6  |
| 586 2S2W_15-5  | Wilson, 1997 | 45.399217 | -122.927892 | 54.1 | 91.9  |
| 587 2S2W_15-6  | Wilson, 1997 | 45.395607 | -122.927819 | 52.2 | 38.8  |
| 588 2S2W_15-7  | Wilson, 1997 | 45.402008 | -122.925977 | 51.0 | 102.8 |
| 589 2S2W_15-8  | Wilson, 1997 | 45.396114 | -122.918698 | 54.6 | 41.2  |
| 590 2S2W_15-9  | Wilson, 1997 | 45.398938 | -122.92142  | 54.6 | 122.2 |
| 591 2S2W_15-10 | Wilson, 1997 | 45.396807 | -122.908542 | 54.9 | 88.7  |
| 592 2S2W_15-11 | Wilson, 1997 | 45.394493 | -122.919112 | 59.3 | 23.3  |
| 593 2S2W_15-13 | Wilson, 1997 | 45.400572 | -122.921458 | 55.0 | 100.4 |
| 594 2S2W_15-14 | Wilson, 1997 | 45.393754 | -122.913025 | 59.7 | 28.9  |
| 595 2S2W_15-15 | Wilson, 1997 | 45.394425 | -122.927903 | 56.8 | 30.3  |
| 596 2S2W_15-16 | Wilson, 1997 | 45.399884 | -122.917891 | 56.1 | 106.1 |
| 597 2S2W_15-18 | Wilson, 1997 | 45.400108 | -122.92791  | 54.5 | 79.5  |
| 598 2S2W_16-1  | Wilson, 1997 | 45.400145 | -122.928773 | 53.3 | 86.8  |
| 599 2S2W_16-2  | Wilson, 1997 | 45.397834 | -122.929728 | 54.8 | 84.6  |
| 600 2S2W_16-3  | Wilson, 1997 | 45.395237 | -122.93669  | 65.4 | 12.9  |
| 601 2S2W_16-4  | Wilson, 1997 | 45.395551 | -122.932106 | 56.1 | 10.3  |
| 602 2S2W_16-5  | Wilson, 1997 | 45.401673 | -122.939019 | 47.3 | 69.6  |
| 603 2S2W_16-6  | Wilson, 1997 | 45.395722 | -122.92883  | 54.2 | 30.8  |
| 604 2S2W_16-7  | Wilson, 1997 | 45.396287 | -122.944814 | 74.7 | 5.2   |
| 605 2S2W_16-8  | Wilson, 1997 | 45.39206  | -122.93162  | 53.9 | 37.8  |
| 606 2S2W_16-9  | Wilson, 1997 | 45.396345 | -122.932599 | 55.8 | 22.9  |
| 607 2S2W_16-11 | Wilson, 1997 | 45.394141 | -122.933055 | 53.4 | 17.7  |
| 608 2S2W_16-12 | Wilson, 1997 | 45.396197 | -122.943274 | 60.0 | 21.9  |
| 609 2S2W_17-1  | Wilson, 1997 | 45.403721 | -122.958522 | 53.0 | 59.1  |
| 610 2S2W_17-4  | Wilson, 1997 | 45.403471 | -122.960531 | 43.3 | 43.9  |
| 611 2S2W_17-7  | Wilson, 1997 | 45.398553 | -122.956821 | 77.6 | 24.6  |
| 612 2S2W_17-14 | Wilson, 1997 | 45.403756 | -122.968971 | 50.2 | 1.5   |
| 613 2S2W_17-16 | Wilson, 1997 | 45.403066 | -122.961669 | 43.6 | 27.4  |
| 614 2S2W_17-17 | Wilson, 1997 | 45.400004 | -122.957583 | 62.7 | 17.3  |
| 615 2S2W_17-18 | Wilson, 1997 | 45.400274 | -122.958477 | 60.3 | 21.6  |
| 616 2S2W_17-19 | Wilson, 1997 | 45.399509 | -122.95803  | 64.5 | 16.7  |
| 617 2S2W_17-20 | Wilson, 1997 | 45.397934 | -122.958607 | 62.9 | 30.9  |
| 618 2N3W_25-3  | Wilson, 1997 | 45.622265 | -123.005895 | 93.0 | 23.8  |
| 619 2N3W_25-4  | Wilson, 1997 | 45.621889 | -123.010059 | 82.1 | 12.0  |
| 620 2N3W_29-1  | Wilson, 1997 | 45.621891 | -123.072434 | 67.3 | 33.4  |
| 621 2N3W_29-5  | Wilson, 1997 | 45.622122 | -123.075306 | 76.5 | 50.6  |
| 622 2N3W_29-8  | Wilson, 1997 | 45.622398 | -123.082057 | 61.7 | 28.2  |
| 623 2N3W_31-1  | Wilson, 1997 | 45.616722 | -123.094515 | 65.1 | 31.6  |
| 624 2N3W_31-2  | Wilson, 1997 | 45.621418 | -123.110447 | 81.6 | 47.2  |
| 625 2N3W_31-4  | Wilson, 1997 | 45.614856 | -123.111672 | 64.1 | 79.3  |
| 626 2N3W_31-12 | Wilson, 1997 | 45.607336 | -123.09787  | 61.1 | 98.5  |
| 627 2N3W_31-13 | Wilson, 1997 | 45.610102 | -123.09813  | 64.3 | 85.0  |
| 628 2N3W_31-14 | Wilson, 1997 | 45.607448 | -123.10283  | 59.9 | 80.7  |
| 629 2N3W_31-15 | Wilson, 1997 | 45.608892 | -123.096119 | 64.2 | 107.7 |
| 630 2N3W_31-18 | Wilson, 1997 | 45.621086 | -123.1058   | 70.8 | 40.3  |
| 631 2N3W_31-19 | Wilson, 1997 | 45.607405 | -123.096213 | 64.1 | 90.0  |
| 632 2N3W_31-21 | Wilson, 1997 | 45.610868 | -123.098107 | 63.0 | 73.0  |

|                |              |           |             |      |       |
|----------------|--------------|-----------|-------------|------|-------|
| 633 2N3W_31-22 | Wilson, 1997 | 45.614905 | -123.111838 | 64.1 | 79.7  |
| 634 2N3W_32-1  | Wilson, 1997 | 45.6076   | -123.090685 | 64.2 | 63.6  |
| 635 2N3W_32-2  | Wilson, 1997 | 45.607445 | -123.084014 | 58.4 | 93.8  |
| 636 2N3W_32-3  | Wilson, 1997 | 45.621472 | -123.072342 | 66.5 | 42.1  |
| 637 2N3W_32-4  | Wilson, 1997 | 45.60747  | -123.088881 | 64.0 | 55.8  |
| 638 2N3W_32-5  | Wilson, 1997 | 45.609754 | -123.077305 | 63.1 | 155.7 |
| 639 2N3W_32-6  | Wilson, 1997 | 45.614127 | -123.092284 | 63.2 | 84.5  |
| 640 2N3W_33-1  | Wilson, 1997 | 45.621371 | -123.071573 | 64.4 | 52.2  |
| 641 2N3W_33-2  | Wilson, 1997 | 45.619822 | -123.059341 | 82.9 | 29.6  |
| 642 2N3W_34-1  | Wilson, 1997 | 45.620084 | -123.044123 | 56.1 | 16.1  |
| 643 2N3W_34-2  | Wilson, 1997 | 45.607634 | -123.035391 | 58.5 | 81.4  |
| 644 2N3W_34-4  | Wilson, 1997 | 45.617166 | -123.048184 | 56.0 | 37.7  |
| 645 2N3W_34-5  | Wilson, 1997 | 45.608089 | -123.031652 | 63.8 | 87.6  |
| 646 2N3W_34-6  | Wilson, 1997 | 45.608516 | -123.03033  | 62.8 | 77.8  |
| 647 2N3W_34-7  | Wilson, 1997 | 45.607272 | -123.031092 | 65.1 | 82.5  |
| 648 2N3W_34-8  | Wilson, 1997 | 45.608923 | -123.034912 | 62.2 | 79.6  |
| 649 2N3W_35-1  | Wilson, 1997 | 45.61724  | -123.013167 | 68.7 | 64.1  |
| 650 2N3W_35-3  | Wilson, 1997 | 45.619909 | -123.026411 | 58.0 | 48.9  |
| 651 2N3W_35-4  | Wilson, 1997 | 45.616489 | -123.012646 | 68.7 | 69.3  |
| 652 2N3W_35-5  | Wilson, 1997 | 45.615245 | -123.027823 | 66.7 | 75.8  |
| 653 2N3W_36-1  | Wilson, 1997 | 45.613747 | -123.073026 | 64.4 | 102.2 |
| 654 2N3W_36-2  | Wilson, 1997 | 45.617798 | -123.006946 | 67.3 | 33.2  |
| 655 2N3W_36-4  | Wilson, 1997 | 45.614056 | -123.005535 | 60.8 | 44.3  |
| 656 2N3W_36-6  | Wilson, 1997 | 45.619253 | -123.007022 | 71.8 | 19.9  |
| 657 2N3W_36-7  | Wilson, 1997 | 45.612017 | -123.009143 | 65.5 | 88.4  |
| 658 1N3W_1-2   | Wilson, 1997 | 45.598738 | -123.00479  | 57.8 | 101.7 |
| 659 1N3W_1-7   | Wilson, 1997 | 45.598669 | -123.008581 | 55.0 | 99.5  |
| 660 1N3W_1-8   | Wilson, 1997 | 45.598337 | -123.001072 | 60.1 | 117.0 |
| 661 1N3W_1-10a | Wilson, 1997 | 45.603483 | -123.008399 | 61.3 | 90.2  |
| 662 1N3W_1-11  | Wilson, 1997 | 45.602133 | -123.007053 | 63.1 | 89.6  |
| 663 1N3W_1-13  | Wilson, 1997 | 45.602808 | -123.008143 | 59.1 | 98.8  |
| 664 1N3W_2-3   | Wilson, 1997 | 45.600097 | -123.02828  | 59.7 | 114.6 |
| 665 1N3W_2-4   | Wilson, 1997 | 45.599482 | -123.021644 | 65.4 | 121.5 |
| 666 1N3W_2-5   | Wilson, 1997 | 45.599485 | -123.020507 | 68.5 | 123.1 |
| 667 1N3W_2-8   | Wilson, 1997 | 45.606182 | -123.019107 | 64.4 | 84.5  |
| 668 1N3W_3-3   | Wilson, 1997 | 45.597491 | -123.040772 | 61.0 | 170.5 |
| 669 1N3W_4-1   | Wilson, 1997 | 45.594394 | -123.069981 | 54.2 | 161.5 |
| 670 1N3W_5-1   | Wilson, 1997 | 45.596734 | -123.081521 | 56.4 | 153.6 |
| 671 1N3W_5-2   | Wilson, 1997 | 45.594994 | -123.082582 | 52.7 | 154.8 |
| 672 1N3W_5-3   | Wilson, 1997 | 45.595713 | -123.080647 | 52.5 | 142.4 |
| 673 1N3W_5-4   | Wilson, 1997 | 45.595146 | -123.080799 | 50.6 | 139.3 |
| 674 1N3W_5-5   | Wilson, 1997 | 45.593554 | -123.081459 | 54.5 | 167.3 |
| 675 1N3W_5-6   | Wilson, 1997 | 45.592999 | -123.082129 | 56.6 | 154.8 |
| 676 1N3W_5-7   | Wilson, 1997 | 45.593102 | -123.081101 | 54.8 | 165.5 |
| 677 1N3W_5-9   | Wilson, 1997 | 45.594039 | -123.081206 | 52.4 | 167.3 |
| 678 1N3W_5-10  | Wilson, 1997 | 45.597547 | -123.083086 | 58.2 | 149.6 |
| 679 1N3W_5-12  | Wilson, 1997 | 45.595708 | -123.080616 | 52.5 | 148.5 |
| 680 1N3W_5-14  | Wilson, 1997 | 45.594903 | -123.074114 | 53.0 | 148.4 |



|                 |              |           |             |       |       |
|-----------------|--------------|-----------|-------------|-------|-------|
| 681 1N3W_5-15   | Wilson, 1997 | 45.603886 | -123.087314 | 62.2  | 114.6 |
| 682 1N3W_5-16   | Wilson, 1997 | 45.596559 | -123.078877 | 55.2  | 153.1 |
| 683 1N3W_5-17   | Wilson, 1997 | 45.606955 | -123.084048 | 60.9  | 89.5  |
| 684 1N3W_5-19   | Wilson, 1997 | 45.603931 | -123.091372 | 57.7  | 108.0 |
| 685 1N3W_5-23   | Wilson, 1997 | 45.598146 | -123.084207 | 55.9  | 145.8 |
| 686 1N3W_05-24  | Wilson, 1997 | 45.60487  | -123.074392 | 61.0  | 138.5 |
| 687 1N3W_05-25  | Wilson, 1997 | 45.601419 | -123.076792 | 57.2  | 141.0 |
| 688 1N3W_6-2    | Wilson, 1997 | 45.607012 | -123.102204 | 59.1  | 82.8  |
| 689 1N3W_6-3    | Wilson, 1997 | 45.606972 | -123.101514 | 58.2  | 81.0  |
| 690 1N3W_6-4    | Wilson, 1997 | 45.60698  | -123.095815 | 64.2  | 89.5  |
| 691 1N3W_6-5    | Wilson, 1997 | 45.603759 | -123.11237  | 60.2  | 105.0 |
| 692 1N3W_7-1    | Wilson, 1997 | 45.592427 | -123.096235 | 59.5  | 199.7 |
| 693 1N3W_8-1a   | Wilson, 1997 | 45.589189 | -123.080366 | 56.6  | 190.1 |
| 694 1N3W_8-2a   | Wilson, 1997 | 45.591907 | -123.081677 | 59.3  | 160.8 |
| 695 1N3W_8-6    | Wilson, 1997 | 45.579629 | -123.084634 | 54.6  | 243.6 |
| 696 1N3W_8-7    | Wilson, 1997 | 45.592233 | -123.083031 | 60.2  | 166.8 |
| 697 1N3W_08-10  | Wilson, 1997 | 45.585808 | -123.088991 | 59.1  | 278.6 |
| 698 1N3W_8-11   | Wilson, 1997 | 45.59197  | -123.093203 | 53.9  | 153.3 |
| 699 1N3W_9-1    | Wilson, 1997 | 45.578479 | -123.058113 | 51.5  | 232.8 |
| 700 1N3W_11-1   | Wilson, 1997 | 45.589864 | -123.013537 | 62.2  | 168.9 |
| 701 1N3W_11-4   | Wilson, 1997 | 45.585479 | -123.026791 | 60.8  | 215.6 |
| 702 1N3W_12-3   | Wilson, 1997 | 45.590502 | -123.001212 | 59.4  | 140.5 |
| 703 1N3W_012-9  | Wilson, 1997 | 45.588762 | -123.008331 | 63.4  | 169.5 |
| 704 1N3W_15-3   | Wilson, 1997 | 45.569822 | -123.046891 | 56.1  | 321.6 |
| 705 1N3W_16-1   | Wilson, 1997 | 45.576926 | -123.055855 | 54.0  | 247.6 |
| 706 1N3W_17-1   | Wilson, 1997 | 45.566563 | -123.088155 | 48.7  | 322.4 |
| 707 1N3W_30-3   | Wilson, 1997 | 45.543528 | -123.105166 | 55.6  | 223.2 |
| 708 1N4W_13-4a  | Wilson, 1997 | 45.563358 | -123.114754 | 57.3  | 97.5  |
| 709 1N4W_25-8   | Wilson, 1997 | 45.548482 | -123.116574 | 55.8  | 188.4 |
| 710 1N4W_36-4   | Wilson, 1997 | 45.527026 | -123.120372 | 60.2  | 55.6  |
| 711 1S3W_8-1    | Wilson, 1997 | 45.503457 | -123.0923   | 48.0  | 72.4  |
| 712 1S3W_TB-501 | Wilson, 1997 | 45.500162 | -123.08806  | 48.6  | 23.3  |
| 713 1S3W_TB-502 | Wilson, 1997 | 45.500612 | -123.088445 | 48.9  | 24.5  |
| 714 1S4W_1-1    | Wilson, 1997 | 45.519754 | -123.123679 | 71.9  | 75.0  |
| 715 1S4W_#1     | Wilson, 1997 | 45.503738 | -123.116354 | 52.0  | 24.0  |
| 716 1S4W_#2     | Wilson, 1997 | 45.503918 | -123.115971 | 52.5  | 23.5  |
| 717 2N2W_36-5   | Wilson, 1997 | 45.62018  | -122.989482 | 111.5 | 44.4  |
| 718 2N3W_36-8   | Wilson, 1997 | 45.610626 | -122.993545 | 72.5  | 50.6  |
| 719 2N2W_30-1   | Wilson, 1997 | 45.62261  | -122.98557  | 106.1 | 14.1  |
| 720 2N2W_31-1   | Wilson, 1997 | 45.618018 | -122.978417 | 56.9  | 9.9   |
| 721 2N2W_031-2  | Wilson, 1997 | 45.614086 | -122.97952  | 63.6  | 39.8  |
| 722 2N2W_32-1   | Wilson, 1997 | 45.610112 | -122.965503 | 54.3  | 62.8  |
| 723 2N2W_033-1  | Wilson, 1997 | 45.607475 | -122.942806 | 105.1 | 48.7  |
| 724 2N2W_034-1  | Wilson, 1997 | 45.615006 | -122.915376 | 157.1 | 15.4  |
| 725 1N3W_1-1    | Wilson, 1997 | 45.596834 | -122.997631 | 58.9  | 121.7 |
| 726 1N3W_1-9    | Wilson, 1997 | 45.599859 | -122.99672  | 65.0  | 73.5  |
| 727 1N3W_12-1   | Wilson, 1997 | 45.588683 | -122.994872 | 55.1  | 202.0 |
| 728 1N3W_36-1   | Wilson, 1997 | 45.52198  | -122.992318 | 59.4  | 454.1 |

|                |              |           |             |       |       |
|----------------|--------------|-----------|-------------|-------|-------|
| 729 1N2W_1-2   | Wilson, 1997 | 45.599854 | -122.877034 | 92.5  | 0.0   |
| 730 1N2W_1-3   | Wilson, 1997 | 45.597743 | -122.886509 | 112.2 | 20.7  |
| 731 1N2W_1-5   | Wilson, 1997 | 45.592673 | -122.878439 | 90.4  | 16.4  |
| 732 1N2W_1-7   | Wilson, 1997 | 45.596793 | -122.875863 | 121.9 | 37.2  |
| 733 1N2W_2-1   | Wilson, 1997 | 45.595782 | -122.906457 | 97.3  | 27.2  |
| 734 1N2W_2-2   | Wilson, 1997 | 45.605612 | -122.889279 | 132.7 | 18.4  |
| 735 1N2W_2-3   | Wilson, 1997 | 45.605151 | -122.890304 | 133.5 | 11.6  |
| 736 1N2W_2-4   | Wilson, 1997 | 45.60467  | -122.902366 | 124.1 | 26.5  |
| 737 1N2W_2-5a  | Wilson, 1997 | 45.601633 | -122.896551 | 114.8 | 69.0  |
| 738 1N2W_2-6   | Wilson, 1997 | 45.604214 | -122.89759  | 135.3 | 50.6  |
| 739 1N2W_2-7   | Wilson, 1997 | 45.601344 | -122.88929  | 118.7 | 1.7   |
| 740 1N2W_2-8   | Wilson, 1997 | 45.603425 | -122.891079 | 128.8 | 8.4   |
| 741 1N2W_2-9   | Wilson, 1997 | 45.599965 | -122.89083  | 118.3 | 12.3  |
| 742 1N2W_2-10  | Wilson, 1997 | 45.599593 | -122.888142 | 111.5 | 6.0   |
| 743 1N2W_2-11  | Wilson, 1997 | 45.604266 | -122.895714 | 136.3 | 47.9  |
| 744 1N2W_2-12  | Wilson, 1997 | 45.600732 | -122.892037 | 127.3 | 1.2   |
| 745 1N2W_02-13 | Wilson, 1997 | 45.597365 | -122.905379 | 102.2 | 47.4  |
| 746 1N2W_2-14  | Wilson, 1997 | 45.599829 | -122.88877  | 114.2 | 10.8  |
| 747 1N2W_3-1   | Wilson, 1997 | 45.595182 | -122.916969 | 83.9  | 26.6  |
| 748 1N2W_3-2   | Wilson, 1997 | 45.593899 | -122.927341 | 80.4  | 8.8   |
| 749 1N2W_3-3   | Wilson, 1997 | 45.597501 | -122.914827 | 93.5  | 42.9  |
| 750 1N2W_3-5   | Wilson, 1997 | 45.602416 | -122.90812  | 128.2 | 32.5  |
| 751 1N2W_3-6   | Wilson, 1997 | 45.605674 | -122.915194 | 134.4 | 60.3  |
| 752 1N2W_3-7   | Wilson, 1997 | 45.600254 | -122.912041 | 120.5 | 59.9  |
| 753 1N2W_3-8   | Wilson, 1997 | 45.592843 | -122.908667 | 90.0  | 44.3  |
| 754 1N2W_3-9   | Wilson, 1997 | 45.592491 | -122.923032 | 78.8  | 45.3  |
| 755 1N2W_03-10 | Wilson, 1997 | 45.605924 | -122.927483 | 129.5 | 35.3  |
| 756 1N2W_4-1   | Wilson, 1997 | 45.595875 | -122.928763 | 84.0  | 48.6  |
| 757 1N2W_4-2   | Wilson, 1997 | 45.599019 | -122.946405 | 71.0  | 33.5  |
| 758 1N2W_4-3   | Wilson, 1997 | 45.605404 | -122.942616 | 90.8  | 37.5  |
| 759 1N2W_5-1   | Wilson, 1997 | 45.592993 | -122.949466 | 69.0  | 104.4 |
| 760 1N2W_5-2   | Wilson, 1997 | 45.59522  | -122.949062 | 69.8  | 82.0  |
| 761 1N2W_5-3   | Wilson, 1997 | 45.595683 | -122.967389 | 63.7  | 74.7  |
| 762 1N2W_5-4   | Wilson, 1997 | 45.596407 | -122.950318 | 69.2  | 114.3 |
| 763 1N2W_6-3   | Wilson, 1997 | 45.59661  | -122.985789 | 54.4  | 91.9  |
| 764 1N2W_06-6  | Wilson, 1997 | 45.596207 | -122.984751 | 54.3  | 101.2 |
| 765 1N2W_8-2   | Wilson, 1997 | 45.581146 | -122.965283 | 64.3  | 245.7 |
| 766 1N2W_8-4   | Wilson, 1997 | 45.592001 | -122.962053 | 65.5  | 85.9  |
| 767 1N2W_9-2   | Wilson, 1997 | 45.584628 | -122.941546 | 63.3  | 127.3 |
| 768 1N2W_9-3   | Wilson, 1997 | 45.590136 | -122.93013  | 73.0  | 40.1  |
| 769 1N2W_9-4   | Wilson, 1997 | 45.58472  | -122.932671 | 67.6  | 60.5  |
| 770 1N2W_10-1  | Wilson, 1997 | 45.589964 | -122.923159 | 76.8  | 29.0  |
| 771 1N2W_10-2  | Wilson, 1997 | 45.590283 | -122.923229 | 77.5  | 30.5  |
| 772 1N2W_10-3  | Wilson, 1997 | 45.579756 | -122.924936 | 69.4  | 89.2  |
| 773 1N2W_10-4  | Wilson, 1997 | 45.587248 | -122.918718 | 64.6  | 49.3  |
| 774 1N2W_11-1  | Wilson, 1997 | 45.583038 | -122.895979 | 74.5  | 26.4  |
| 775 1N2W_11-2  | Wilson, 1997 | 45.581111 | -122.900023 | 78.4  | 37.2  |
| 776 1N2W_11-3  | Wilson, 1997 | 45.587316 | -122.897289 | 66.9  | 30.0  |

|                |              |           |             |       |       |
|----------------|--------------|-----------|-------------|-------|-------|
| 777 1N2W_11-4  | Wilson, 1997 | 45.584188 | -122.894327 | 63.5  | 51.3  |
| 778 1N2W_11-5  | Wilson, 1997 | 45.583838 | -122.899079 | 85.9  | 17.6  |
| 779 1N2W_11-6  | Wilson, 1997 | 45.591817 | -122.901765 | 73.8  | 42.7  |
| 780 1N2W_11-7  | Wilson, 1997 | 45.590055 | -122.897205 | 68.4  | 24.2  |
| 781 1N2W_11-8  | Wilson, 1997 | 45.581607 | -122.894253 | 75.7  | 42.1  |
| 782 1N2W_12-1  | Wilson, 1997 | 45.579158 | -122.877082 | 81.6  | 66.4  |
| 783 1N2W_12-2  | Wilson, 1997 | 45.590781 | -122.886098 | 100.1 | 24.8  |
| 784 1N2W_12-3  | Wilson, 1997 | 45.591832 | -122.880023 | 89.0  | 30.2  |
| 785 1N2W_12-4  | Wilson, 1997 | 45.590247 | -122.884794 | 97.1  | 23.7  |
| 786 1N2W_12-5  | Wilson, 1997 | 45.579089 | -122.882173 | 75.5  | 50.8  |
| 787 1N2W_12-6  | Wilson, 1997 | 45.591854 | -122.88393  | 92.3  | 30.8  |
| 788 1N2W_12-11 | Wilson, 1997 | 45.591711 | -122.877781 | 86.4  | 13.8  |
| 789 1N2W_14-1  | Wilson, 1997 | 45.573529 | -122.88693  | 55.1  | 75.9  |
| 790 1N2W_14-2  | Wilson, 1997 | 45.566674 | -122.892189 | 67.8  | 108.1 |
| 791 1N2W_14-3  | Wilson, 1997 | 45.573665 | -122.903055 | 73.2  | 90.0  |
| 792 1N2W_14-4  | Wilson, 1997 | 45.573104 | -122.901939 | 75.0  | 97.2  |
| 793 1N2W_14-5  | Wilson, 1997 | 45.571465 | -122.891365 | 77.4  | 130.8 |
| 794 1N2W_14-6  | Wilson, 1997 | 45.573107 | -122.89547  | 77.5  | 97.7  |
| 795 1N2W_14-7  | Wilson, 1997 | 45.571678 | -122.898489 | 78.5  | 106.6 |
| 796 1N2W_14-9  | Wilson, 1997 | 45.573048 | -122.892611 | 72.7  | 99.5  |
| 797 1N2W_14-10 | Wilson, 1997 | 45.572289 | -122.899886 | 76.5  | 91.8  |
| 798 1N2W_14-15 | Wilson, 1997 | 45.576564 | -122.886336 | 65.8  | 53.6  |
| 799 1N2W_14-16 | Wilson, 1997 | 45.570182 | -122.896454 | 76.1  | 122.1 |
| 800 1N2W_14-17 | Wilson, 1997 | 45.573441 | -122.890696 | 60.6  | 89.5  |
| 801 1N2W_14-19 | Wilson, 1997 | 45.573269 | -122.893736 | 76.7  | 88.9  |
| 802 1N2W_14-20 | Wilson, 1997 | 45.574556 | -122.895889 | 77.1  | 105.4 |
| 803 1N2W_14-21 | Wilson, 1997 | 45.570246 | -122.894977 | 77.2  | 126.0 |
| 804 1N2W_15-1  | Wilson, 1997 | 45.569246 | -122.916932 | 68.9  | 120.7 |
| 805 1N2W_15-2  | Wilson, 1997 | 45.5699   | -122.917704 | 70.3  | 128.8 |
| 806 1N2W_15-3  | Wilson, 1997 | 45.576538 | -122.914034 | 70.9  | 95.3  |
| 807 1N2W_15-4  | Wilson, 1997 | 45.568549 | -122.922269 | 59.5  | 122.0 |
| 808 1N2W_15-5  | Wilson, 1997 | 45.577085 | -122.922362 | 62.5  | 96.0  |
| 809 1N2W_15-6  | Wilson, 1997 | 45.572612 | -122.917644 | 61.5  | 106.9 |
| 810 1N2W_15-7  | Wilson, 1997 | 45.576504 | -122.913331 | 71.1  | 93.3  |
| 811 1N2W_15-8  | Wilson, 1997 | 45.572561 | -122.916113 | 63.1  | 107.3 |
| 812 1N2W_15-10 | Wilson, 1997 | 45.565876 | -122.919911 | 63.3  | 151.4 |
| 813 1N2W_16-1  | Wilson, 1997 | 45.574045 | -122.946822 | 59.4  | 255.4 |
| 814 1N2W_16-3  | Wilson, 1997 | 45.567064 | -122.930732 | 60.6  | 155.7 |
| 815 1N2W_17-1  | Wilson, 1997 | 45.570841 | -122.956108 | 51.6  | 176.6 |
| 816 1N2W_17-4  | Wilson, 1997 | 45.571723 | -122.960724 | 60.2  | 180.3 |
| 817 1N2W_22-2  | Wilson, 1997 | 45.562096 | -122.923322 | 64.1  | 164.7 |
| 818 1N2W_22-3  | Wilson, 1997 | 45.555426 | -122.924376 | 65.5  | 216.7 |
| 819 1N2W_22-5  | Wilson, 1997 | 45.560466 | -122.9102   | 68.4  | 124.8 |
| 820 1N2W_24-1  | Wilson, 1997 | 45.555932 | -122.876967 | 58.7  | 101.3 |
| 821 1N2W_28-2  | Wilson, 1997 | 45.543147 | -122.933379 | 61.0  | 298.4 |
| 822 1N2W_34-5  | Wilson, 1997 | 45.530926 | -122.909785 | 64.5  | 409.0 |
| 823 2S1W_22-2  | Wilson, 1997 | 45.385736 | -122.787013 | 42.0  | 35.1  |
| 824 2S1W_22-3  | Wilson, 1997 | 45.38545  | -122.785663 | 41.2  | 25.0  |

|                |              |           |             |       |       |
|----------------|--------------|-----------|-------------|-------|-------|
| 825 2SIW_22-4a | Wilson, 1997 | 45.376113 | -122.802456 | 44.9  | 72.3  |
| 826 2SIW_22-5  | Wilson, 1997 | 45.38298  | -122.804129 | 41.2  | 150.9 |
| 827 2SIW_22-6  | Wilson, 1997 | 45.377205 | -122.798504 | 44.9  | 57.1  |
| 828 2SIW_23-1  | Wilson, 1997 | 45.388596 | -122.776845 | 43.5  | 42.0  |
| 829 2SIW_23-2  | Wilson, 1997 | 45.382108 | -122.763556 | 38.5  | 18.7  |
| 830 2SIW_23-4  | Wilson, 1997 | 45.386378 | -122.77581  | 39.0  | 19.5  |
| 831 2SIW_23-6  | Wilson, 1997 | 45.378444 | -122.780512 | 49.0  | 23.1  |
| 832 1SIW_10-2  | Wilson, 1997 | 45.499461 | -122.794203 | 70.4  | 146.6 |
| 833 1SIW_10-3  | Wilson, 1997 | 45.497873 | -122.786477 | 81.9  | 152.0 |
| 834 1SIW_10-4  | Wilson, 1997 | 45.492388 | -122.792096 | 64.2  | 195.6 |
| 835 1SIW_11-1  | Wilson, 1997 | 45.494055 | -122.771243 | 83.7  | 169.1 |
| 836 1SIW_11-2  | Wilson, 1997 | 45.498106 | -122.77399  | 109.4 | 197.8 |
| 837 1SIW_12-1  | Wilson, 1997 | 45.492655 | -122.758025 | 99.1  | 135.7 |
| 838 1SIW_13-3  | Wilson, 1997 | 45.485043 | -122.75448  | 90.4  | 187.6 |
| 839 1SIW_14-3  | Wilson, 1997 | 45.485808 | -122.768826 | 77.5  | 205.6 |
| 840 1SIW_17-1  | Wilson, 1997 | 45.487922 | -122.826361 | 63.0  | 357.1 |
| 841 1SIW_17-2  | Wilson, 1997 | 45.479131 | -122.839585 | 81.3  | 0.0   |
| 842 1SIW_19-1  | Wilson, 1997 | 45.466699 | -122.852975 | 92.1  | 50.9  |
| 843 1SIW_19-2  | Wilson, 1997 | 45.470743 | -122.859016 | 79.4  | 8.1   |
| 844 1SIW_19-3  | Wilson, 1997 | 45.472299 | -122.859547 | 71.4  | 26.3  |
| 845 1SIW_19-5  | Wilson, 1997 | 45.467525 | -122.850097 | 85.8  | 50.7  |
| 846 1SIW_019-7 | Wilson, 1997 | 45.470352 | -122.864902 | 91.8  | 10.7  |
| 847 1SIW_20-2  | Wilson, 1997 | 45.47495  | -122.829421 | 68.3  | 30.4  |
| 848 1SIW_20-3  | Wilson, 1997 | 45.474919 | -122.833909 | 60.6  | 49.6  |
| 849 1SIW_20-5  | Wilson, 1997 | 45.474895 | -122.832825 | 57.2  | 16.0  |
| 850 1SIW_20-6  | Wilson, 1997 | 45.465273 | -122.835366 | 67.8  | 11.5  |
| 851 1SIW_20-7  | Wilson, 1997 | 45.462702 | -122.834508 | 73.9  | 24.5  |
| 852 1SIW_20-8  | Wilson, 1997 | 45.465862 | -122.839957 | 81.2  | 21.7  |
| 853 1SIW_21-1  | Wilson, 1997 | 45.46958  | -122.811743 | 76.6  | 9.8   |
| 854 1SIW_21-2  | Wilson, 1997 | 45.475809 | -122.816294 | 72.4  | 81.6  |
| 855 1SIW_21-3  | Wilson, 1997 | 45.463651 | -122.8062   | 77.4  | 60.6  |
| 856 1SIW_021-4 | Wilson, 1997 | 45.463168 | -122.815072 | 108.1 | 17.8  |
| 857 1SIW_23-1  | Wilson, 1997 | 45.463439 | -122.774905 | 76.8  | 49.3  |
| 858 1SIW_23-2  | Wilson, 1997 | 45.467225 | -122.773564 | 64.6  | 182.9 |
| 859 1SIW_24-1  | Wilson, 1997 | 45.475246 | -122.754936 | 73.8  | 58.5  |
| 860 1SIW_24-2  | Wilson, 1997 | 45.467804 | -122.755159 | 85.3  | 74.9  |
| 861 1SIW_24-3  | Wilson, 1997 | 45.465937 | -122.761515 | 83.5  | 50.0  |
| 862 1SIW_24-4  | Wilson, 1997 | 45.474851 | -122.762201 | 68.0  | 107.0 |
| 863 1SIW_24-5  | Wilson, 1997 | 45.47023  | -122.751858 | 81.4  | 113.4 |
| 864 1SIW_24-6  | Wilson, 1997 | 45.472046 | -122.752226 | 68.0  | 139.6 |
| 865 1SIW_24-10 | Wilson, 1997 | 45.469989 | -122.754652 | 82.0  | 125.6 |
| 866 1SIW_25-1  | Wilson, 1997 | 45.461169 | -122.761245 | 72.2  | 50.8  |
| 867 1SIW_25-2  | Wilson, 1997 | 45.453392 | -122.758354 | 66.2  | 31.2  |
| 868 1SIW_26-1  | Wilson, 1997 | 45.460175 | -122.774087 | 85.1  | 50.9  |
| 869 1SIW_26-1a | Wilson, 1997 | 45.45699  | -122.772413 | 75.3  | 13.4  |
| 870 1SIW_26-2  | Wilson, 1997 | 45.448307 | -122.777352 | 76.6  | 10.5  |
| 871 1SIW_026-4 | Wilson, 1997 | 45.449549 | -122.773171 | 73.3  | 5.6   |
| 872 1SIW_BVD-3 | Wilson, 1997 | 45.455272 | -122.782828 | 74.2  | 13.3  |

|     |             |              |           |             |       |       |       |
|-----|-------------|--------------|-----------|-------------|-------|-------|-------|
| 873 | 1SIW_27-1   | Wilson, 1997 | 45.460078 | -122.79301  | 56.4  | 14.1  |       |
| 874 | 1SIW_27-2   | Wilson, 1997 | 45.452523 | -122.786512 | 63.6  | 10.2  |       |
| 875 | 1SIW_27-3   | Wilson, 1997 | 45.459545 | -122.785297 | 59.8  | 3.4   |       |
| 876 | 1SIW_28-3   | Wilson, 1997 | 45.459754 | -122.806235 | 81.3  | 42.9  |       |
| 877 | 1SIW_28-4   | Wilson, 1997 | 45.459799 | -122.810957 | 87.8  | 11.6  |       |
| 878 | 1SIW_28-5   | Wilson, 1997 | 45.454484 | -122.814532 | 81.7  | 33.2  |       |
| 879 | 1SIW_29-1   | Wilson, 1997 | 45.447861 | -122.830884 | 84.4  | 39.3  |       |
| 880 | 1SIW_32-1   | Wilson, 1997 | 45.438242 | -122.829015 | 74.4  | 17.4  |       |
| 881 | 1SIW_32-1a  | Wilson, 1997 | 45.43857  | -122.827883 | 72.4  | 18.2  |       |
| 882 | 1SIW_32-2   | Wilson, 1997 | 45.4339   | -122.838466 | 124.0 | 3.3   |       |
| 883 | 1SIW_33-1a  | Wilson, 1997 | 45.435711 | -122.821259 | 65.3  | 86.4  |       |
| 884 | 1SIW_33-5a  | Wilson, 1997 | 45.442307 | -122.808078 | 68.7  | 121.1 |       |
| 885 | 1SIW_33-6   | Wilson, 1997 | 45.435044 | -122.819559 | 61.7  | 107.4 |       |
| 886 | 1SIW_33-7   | Wilson, 1997 | 45.444854 | -122.807143 | 71.9  | 195.9 |       |
| 887 | 1SIW_034-13 | Wilson, 1997 | 45.445015 | -122.794025 | 58.1  | 76.4  |       |
| 888 | 1SIW_35-2   | Wilson, 1997 | 45.439082 | -122.769166 | 63.2  | 112.3 |       |
| 889 | 1SIW_35-5   | Wilson, 1997 | 45.447004 | -122.764504 | 54.4  | 0.8   |       |
| 890 | 1SIW_36-1   | Wilson, 1997 | 45.436825 | -122.756681 | 67.5  | 123.0 |       |
| 891 | 2SIW_1-1    | Wilson, 1997 | 45.425373 | -122.760227 | 47.9  | 157.6 |       |
| 892 | 2SIW_2-2    | Wilson, 1997 | 45.432393 | -122.765769 | 62.7  | 195.3 | 119.2 |
| 893 | 2SIW_02-4   | Wilson, 1997 | 45.423512 | -122.778931 | 69.0  | 109.2 |       |
| 894 | 2SIW_3-2    | Wilson, 1997 | 45.422891 | -122.794265 | 80.4  | 39.3  |       |
| 895 | 2SIW_3-3    | Wilson, 1997 | 45.420719 | -122.79301  | 77.8  | 44.0  |       |
| 896 | 2SIW_4-1    | Wilson, 1997 | 45.427973 | -122.821951 | 109.2 | 36.1  |       |
| 897 | 2SIW_4-2    | Wilson, 1997 | 45.43272  | -122.81461  | 73.3  | 106.9 |       |
| 898 | 2SIW_4-4    | Wilson, 1997 | 45.425933 | -122.813924 | 120.8 | 18.3  |       |
| 899 | 2SIW_5-1    | Wilson, 1997 | 45.425405 | -122.834309 | 87.2  | 2.1   |       |
| 900 | 2SIW_6-1    | Wilson, 1997 | 45.422032 | -122.865176 | 76.0  | 0.4   |       |
| 901 | 2SIW_6-2    | Wilson, 1997 | 45.428428 | -122.862638 | 93.5  | 19.4  |       |
| 902 | 2SIW_6-3    | Wilson, 1997 | 45.421372 | -122.851516 | 74.3  | 8.7   |       |
| 903 | 2SIW_06-4   | Wilson, 1997 | 45.425563 | -122.846931 | 97.8  | 3.0   |       |
| 904 | 2SIW_7-1    | Wilson, 1997 | 45.417152 | -122.850749 | 86.1  | 11.5  |       |
| 905 | 2SIW_7-2    | Wilson, 1997 | 45.416187 | -122.851793 | 84.4  | 9.1   |       |
| 906 | 2SIW_7-3    | Wilson, 1997 | 45.41149  | -122.846963 | 97.0  | 18.0  |       |
| 907 | 2SIW_7-4    | Wilson, 1997 | 45.412805 | -122.865816 | 50.9  | 23.5  |       |
| 908 | 2SIW_10-1   | Wilson, 1997 | 45.417286 | -122.796175 | 92.5  | 51.4  |       |
| 909 | 2SIW_10-2   | Wilson, 1997 | 45.411254 | -122.802268 | 126.0 | 1.3   |       |
| 910 | 2SIW_10-3   | Wilson, 1997 | 45.411883 | -122.791379 | 109.7 | 0.0   |       |
| 911 | 2SIW_10-4   | Wilson, 1997 | 45.406292 | -122.801432 | 61.4  | 40.1  |       |
| 912 | 2SIW_10-5   | Wilson, 1997 | 45.409497 | -122.790884 | 82.2  | 15.1  |       |
| 913 | 2SIW_10-6a  | Wilson, 1997 | 45.408486 | -122.787242 | 77.1  | 1.8   |       |
| 914 | 2SIW_10-7   | Wilson, 1997 | 45.411883 | -122.79148  | 109.6 | 31.9  |       |
| 915 | 2SIW_11-1   | Wilson, 1997 | 45.412968 | -122.771193 | 73.7  | 13.7  |       |
| 916 | 2SIW_11-2   | Wilson, 1997 | 45.410057 | -122.766029 | 60.6  | 46.0  |       |
| 917 | 2SIW_11-3   | Wilson, 1997 | 45.410594 | -122.769789 | 65.1  | 26.1  |       |
| 918 | 2SIW_11-4   | Wilson, 1997 | 45.40644  | -122.775381 | 68.9  | 27.8  |       |
| 919 | 2SIW_11-5   | Wilson, 1997 | 45.40466  | -122.776764 | 64.8  | 52.9  |       |
| 920 | 2SIW_11-6   | Wilson, 1997 | 45.41311  | -122.774121 | 81.2  | 21.5  |       |

|                 |              |           |             |       |       |
|-----------------|--------------|-----------|-------------|-------|-------|
| 921 2SIW_011-7  | Wilson, 1997 | 45.414425 | -122.783102 | 115.8 | 8.2   |
| 922 2SIW_011-8  | Wilson, 1997 | 45.410766 | -122.775714 | 77.9  | 17.3  |
| 923 2SIW_13-6   | Wilson, 1997 | 45.402042 | -122.762631 | 50.5  | 198.0 |
| 924 2SIW_14-1   | Wilson, 1997 | 45.403793 | -122.766618 | 57.8  | 179.7 |
| 925 2SIW_15-1   | Wilson, 1997 | 45.394824 | -122.787269 | 43.6  | 178.4 |
| 926 2SIW_15-2   | Wilson, 1997 | 45.398969 | -122.79765  | 48.7  | 161.2 |
| 927 2SIW_15-3   | Wilson, 1997 | 45.396613 | -122.800876 | 45.4  | 63.6  |
| 928 2SIW_15-4   | Wilson, 1997 | 45.397526 | -122.802952 | 49.7  | 38.4  |
| 929 2SIW_15-5   | Wilson, 1997 | 45.397769 | -122.800029 | 48.0  | 92.5  |
| 930 2SIW_15-6   | Wilson, 1997 | 45.395236 | -122.801276 | 42.0  | 78.6  |
| 931 2SIW_15-13  | Wilson, 1997 | 45.401741 | -122.785463 | 47.1  | 152.9 |
| 932 2SIW_15-14  | Wilson, 1997 | 45.402939 | -122.795295 | 55.1  | 67.9  |
| 933 2SIW_15-15  | Wilson, 1997 | 45.400984 | -122.790208 | 48.5  | 159.7 |
| 934 2SIW_15-21  | Wilson, 1997 | 45.396206 | -122.803781 | 46.8  | 48.3  |
| 935 2SIW_15-22  | Wilson, 1997 | 45.393901 | -122.794976 | 43.0  | 211.2 |
| 936 2SIW_16-1   | Wilson, 1997 | 45.394421 | -122.809163 | 41.4  | 88.9  |
| 937 2SIW_16-2   | Wilson, 1997 | 45.391731 | -122.81008  | 37.9  | 142.5 |
| 938 2SIW_16-3   | Wilson, 1997 | 45.394951 | -122.810937 | 44.2  | 56.4  |
| 939 2SIW_16-4   | Wilson, 1997 | 45.395229 | -122.809844 | 44.3  | 68.6  |
| 940 2SIW_16-5   | Wilson, 1997 | 45.399682 | -122.81023  | 53.1  | 58.3  |
| 941 2SIW_16-6   | Wilson, 1997 | 45.399479 | -122.810974 | 52.6  | 21.5  |
| 942 2SIW_16-7   | Wilson, 1997 | 45.397963 | -122.820415 | 54.6  | 16.2  |
| 943 2SIW_16-8   | Wilson, 1997 | 45.398282 | -122.818957 | 54.1  | 9.9   |
| 944 2SIW_16-9   | Wilson, 1997 | 45.393773 | -122.817325 | 43.4  | 15.9  |
| 945 2SIW_16-10  | Wilson, 1997 | 45.399363 | -122.817798 | 57.5  | 19.4  |
| 946 2SIW_16-14  | Wilson, 1997 | 45.397486 | -122.813419 | 48.9  | 7.5   |
| 947 2SIW_16-15  | Wilson, 1997 | 45.398753 | -122.811049 | 51.5  | 65.2  |
| 948 2SIW_16-17  | Wilson, 1997 | 45.396936 | -122.81352  | 48.2  | 19.2  |
| 949 2SIW_16-18  | Wilson, 1997 | 45.402529 | -122.80821  | 60.2  | 13.9  |
| 950 2SIW_16-19  | Wilson, 1997 | 45.395458 | -122.818953 | 46.1  | 17.4  |
| 951 2SIW_016-20 | Wilson, 1997 | 45.3963   | -122.819994 | 48.0  | 14.5  |
| 952 2SIW_016-21 | Wilson, 1997 | 45.400763 | -122.821271 | 64.2  | 13.7  |
| 953 2SIW_17-2   | Wilson, 1997 | 45.393347 | -122.841832 | 44.3  | 54.7  |
| 954 2SIW_17-3   | Wilson, 1997 | 45.393368 | -122.840681 | 33.5  | 38.1  |
| 955 2SIW_17-5   | Wilson, 1997 | 45.396211 | -122.841791 | 47.5  | 10.3  |
| 956 2SIW_17-7   | Wilson, 1997 | 45.402665 | -122.828168 | 91.1  | 0.0   |
| 957 2SIW_17-8   | Wilson, 1997 | 45.400771 | -122.829276 | 69.8  | 1.5   |
| 958 2SIW_17-9   | Wilson, 1997 | 45.399573 | -122.833297 | 60.8  | 13.6  |
| 959 2SIW_17-10  | Wilson, 1997 | 45.40032  | -122.82867  | 64.8  | 12.6  |
| 960 2SIW_17-11  | Wilson, 1997 | 45.397381 | -122.828524 | 39.0  | 4.6   |
| 961 2SIW_17-12  | Wilson, 1997 | 45.397517 | -122.829304 | 51.0  | 16.6  |
| 962 2SIW_17-13  | Wilson, 1997 | 45.390282 | -122.844352 | 41.9  | 37.0  |
| 963 2SIW_17-14  | Wilson, 1997 | 45.400359 | -122.829916 | 67.0  | 15.1  |
| 964 2SIW_18-1   | Wilson, 1997 | 45.390528 | -122.866145 | 37.6  | 6.5   |
| 965 2SIW_18-2   | Wilson, 1997 | 45.398216 | -122.853099 | 51.0  | 21.2  |
| 966 2SIW_18-4   | Wilson, 1997 | 45.39985  | -122.846953 | 60.5  | 2.6   |
| 967 2SIW_18-5   | Wilson, 1997 | 45.390668 | -122.852701 | 49.6  | 81.0  |
| 968 2SIW_18-6   | Wilson, 1997 | 45.402239 | -122.8459   | 69.7  | 0.2   |

|                 |              |           |             |       |       |
|-----------------|--------------|-----------|-------------|-------|-------|
| 969 2S1W_18-7   | Wilson, 1997 | 45.400993 | -122.852294 | 56.0  | 2.7   |
| 970 2S2W_18-8   | Wilson, 1997 | 45.390438 | -122.866891 | 33.4  | 13.6  |
| 971 2S1W_19-1   | Wilson, 1997 | 45.381989 | -122.852222 | 49.0  | 64.2  |
| 972 2S1W_19-2   | Wilson, 1997 | 45.382797 | -122.857495 | 51.4  | 58.4  |
| 973 2S1W_19-3   | Wilson, 1997 | 45.375759 | -122.850016 | 37.7  | 13.0  |
| 974 2S1W_19-4   | Wilson, 1997 | 45.376433 | -122.850283 | 37.5  | 11.6  |
| 975 2S1W_20-1   | Wilson, 1997 | 45.381927 | -122.830443 | 45.9  | 125.1 |
| 976 2S1W_20-2   | Wilson, 1997 | 45.381875 | -122.8274   | 41.0  | 158.1 |
| 977 2S1W_20-2a  | Wilson, 1997 | 45.382148 | -122.826945 | 36.0  | 163.4 |
| 978 2S1W_20-4   | Wilson, 1997 | 45.382772 | -122.830005 | 38.2  | 118.9 |
| 979 2S1W_21-5   | Wilson, 1997 | 45.376827 | -122.813536 | 43.9  | 62.2  |
| 980 2S1W_21-6   | Wilson, 1997 | 45.377803 | -122.806877 | 43.6  | 82.6  |
| 981 2S1W_21-7   | Wilson, 1997 | 45.389194 | -122.805    | 57.6  | 126.5 |
| 982 2S1W_21-9   | Wilson, 1997 | 45.375985 | -122.813634 | 46.1  | 61.4  |
| 983 2S1W_21-13  | Wilson, 1997 | 45.377091 | -122.81281  | 42.6  | 103.5 |
| 984 2S1W_22-1   | Wilson, 1997 | 45.387129 | -122.785306 | 46.8  | 47.5  |
| 985 2S1W_23-12  | Wilson, 1997 | 45.389528 | -122.783558 | 47.3  | 42.8  |
| 986 2S1W_24-2   | Wilson, 1997 | 45.386324 | -122.756232 | 42.1  | 19.9  |
| 987 2S1W_024-6  | Wilson, 1997 | 45.382473 | -122.757665 | 38.7  | 47.9  |
| 988 2S1W_024-7  | Wilson, 1997 | 45.382512 | -122.76029  | 39.0  | 26.2  |
| 989 2S1W_26-1   | Wilson, 1997 | 45.375073 | -122.783653 | 54.0  | 125.7 |
| 990 1S2W_13-6   | Wilson, 1997 | 45.47871  | -122.872758 | 65.4  | 214.7 |
| 991 1S2W_24-12  | Wilson, 1997 | 45.466591 | -122.869696 | 107.4 | 30.5  |
| 992 1S2W_024-14 | Wilson, 1997 | 45.47135  | -122.869952 | 72.3  | 67.8  |
| 993 2S2W_1-4    | Wilson, 1997 | 45.427252 | -122.873061 | 86.2  | 3.6   |
| 994 2S2W_1-5    | Wilson, 1997 | 45.425342 | -122.871465 | 88.6  | 6.6   |
| 995 2S2W_12-10  | Wilson, 1997 | 45.41451  | -122.870202 | 64.6  | 12.8  |
| 996 2S2W_13-3   | Wilson, 1997 | 45.400911 | -122.869844 | 40.3  | 59.5  |
| 997 2S2W_13-4   | Wilson, 1997 | 45.390872 | -122.868275 | 47.9  | 16.8  |
| 998 2S2W_13-5   | Wilson, 1997 | 45.401362 | -122.867158 | 41.1  | 124.9 |
| 999 2S2W_13-6   | Wilson, 1997 | 45.389851 | -122.870741 | 49.9  | 15.5  |
| 1000 1N1W_7-1   | Wilson, 1997 | 45.582316 | -122.861682 | 84.5  | 11.4  |
| 1001 1N1W_7-2   | Wilson, 1997 | 45.58048  | -122.866037 | 82.8  | 47.5  |
| 1002 1N1W_7-3   | Wilson, 1997 | 45.581606 | -122.847743 | 84.4  | 17.3  |
| 1003 1N1W_7-4   | Wilson, 1997 | 45.581262 | -122.847007 | 77.9  | 6.3   |
| 1004 1N1W_7-5   | Wilson, 1997 | 45.587945 | -122.846326 | 129.4 | 9.3   |
| 1005 1N1W_7-6   | Wilson, 1997 | 45.58127  | -122.848303 | 82.0  | 4.9   |
| 1006 1N1W_7-7   | Wilson, 1997 | 45.583842 | -122.862142 | 88.4  | 19.5  |
| 1007 1N1W_7-8   | Wilson, 1997 | 45.58089  | -122.848598 | 75.7  | 3.2   |
| 1008 1N1W_7-9   | Wilson, 1997 | 45.582465 | -122.856118 | 70.7  | 28.7  |
| 1009 1N1W_15-1  | Wilson, 1997 | 45.568015 | -122.804339 | 203.2 | 53.2  |
| 1010 1N1W_16-4  | Wilson, 1997 | 45.572298 | -122.82412  | 126.1 | 113.9 |
| 1011 1N1W_17-1  | Wilson, 1997 | 45.566749 | -122.83554  | 102.0 | 71.2  |
| 1012 1N1W_17-2  | Wilson, 1997 | 45.572401 | -122.836172 | 98.4  | 72.5  |
| 1013 1N1W_17-5  | Wilson, 1997 | 45.571173 | -122.837159 | 109.2 | 61.3  |
| 1014 1N1W_17-7  | Wilson, 1997 | 45.568084 | -122.826593 | 127.6 | 77.9  |
| 1015 1N1W_17-8  | Wilson, 1997 | 45.571807 | -122.836232 | 104.7 | 65.1  |
| 1016 1N1W_17-10 | Wilson, 1997 | 45.573049 | -122.838369 | 96.2  | 37.0  |

|                  |              |           |             |       |       |
|------------------|--------------|-----------|-------------|-------|-------|
| 1017 1N1W_17-11  | Wilson, 1997 | 45.573018 | -122.841749 | 92.7  | 47.0  |
| 1018 1N1W_18-1   | Wilson, 1997 | 45.574408 | -122.84832  | 88.1  | 63.4  |
| 1019 1N1W_18-2   | Wilson, 1997 | 45.57218  | -122.849379 | 97.1  | 63.2  |
| 1020 1N1W_18-3   | Wilson, 1997 | 45.574395 | -122.850966 | 93.0  | 56.4  |
| 1021 1N1W_18-4   | Wilson, 1997 | 45.57292  | -122.847774 | 95.3  | 63.3  |
| 1022 1N1W_18-5   | Wilson, 1997 | 45.573876 | -122.84998  | 92.0  | 60.0  |
| 1023 1N1W_18-6   | Wilson, 1997 | 45.564026 | -122.859731 | 77.8  | 122.9 |
| 1024 1N1W_18-7   | Wilson, 1997 | 45.563561 | -122.851105 | 68.7  | 66.0  |
| 1025 1N1W_018-8  | Wilson, 1997 | 45.567155 | -122.849524 | 82.4  | 55.6  |
| 1026 1N1W_501    | Wilson, 1997 | 45.570224 | -122.866251 | 56.1  | 27.5  |
| 1027 1N1W_503    | Wilson, 1997 | 45.569889 | -122.866275 | 55.9  | 23.0  |
| 1028 1N1W_502    | Wilson, 1997 | 45.569747 | -122.866385 | 55.8  | 22.9  |
| 1029 1N1W_20-1   | Wilson, 1997 | 45.557234 | -122.828578 | 107.1 | 89.7  |
| 1030 1N1W_20-2   | Wilson, 1997 | 45.562077 | -122.833967 | 93.0  | 71.7  |
| 1031 1N1W_20-3   | Wilson, 1997 | 45.554639 | -122.829402 | 107.4 | 105.2 |
| 1032 1N1W_20-5   | Wilson, 1997 | 45.54955  | -122.843075 | 80.0  | 127.3 |
| 1033 1N1W_20-6   | Wilson, 1997 | 45.549199 | -122.840662 | 81.1  | 118.6 |
| 1034 1N1W_21-5   | Wilson, 1997 | 45.555206 | -122.819572 | 88.3  | 109.4 |
| 1035 1N1W_21-6   | Wilson, 1997 | 45.554984 | -122.819219 | 84.2  | 106.7 |
| 1036 1N1W_21-7   | Wilson, 1997 | 45.556074 | -122.819552 | 97.6  | 102.5 |
| 1037 1N1W_21-8   | Wilson, 1997 | 45.558795 | -122.823636 | 117.7 | 100.9 |
| 1038 1N1W_21-13  | Wilson, 1997 | 45.558949 | -122.804892 | 116.2 | 66.6  |
| 1039 1N1W_21-23  | Wilson, 1997 | 45.549191 | -122.814569 | 101.8 | 99.7  |
| 1040 1N1W_026-2  | Wilson, 1997 | 45.545073 | -122.781682 | 175.4 | 40.3  |
| 1041 1N1W_026-3  | Wilson, 1997 | 45.547271 | -122.765516 | 340.5 | 37.2  |
| 1042 1N1W_27-2   | Wilson, 1997 | 45.536658 | -122.802844 | 168.2 | 94.7  |
| 1043 1N1W_28-3   | Wilson, 1997 | 45.540889 | -122.80985  | 110.7 | 76.3  |
| 1044 1N1W_28-5   | Wilson, 1997 | 45.547658 | -122.816905 | 98.9  | 106.3 |
| 1045 1N1W_28-6   | Wilson, 1997 | 45.547612 | -122.815407 | 100.2 | 97.1  |
| 1046 1N1W_28-7   | Wilson, 1997 | 45.546546 | -122.81541  | 96.1  | 85.4  |
| 1047 1N1W_28-8   | Wilson, 1997 | 45.547807 | -122.821298 | 88.5  | 100.7 |
| 1048 1N1W_28-11  | Wilson, 1997 | 45.548794 | -122.81513  | 100.3 | 87.2  |
| 1049 1N1W_28-12  | Wilson, 1997 | 45.542368 | -122.80973  | 99.5  | 55.3  |
| 1050 1N1W_28-16  | Wilson, 1997 | 45.537468 | -122.811483 | 94.0  | 139.4 |
| 1051 1N1W_28-18  | Wilson, 1997 | 45.543255 | -122.820243 | 93.5  | 145.3 |
| 1052 1N1W_028-21 | Wilson, 1997 | 45.537518 | -122.818935 | 84.3  | 155.9 |
| 1053 1N1W_29-2   | Wilson, 1997 | 45.547867 | -122.828204 | 69.1  | 92.0  |
| 1054 1N1W_29-5   | Wilson, 1997 | 45.545188 | -122.839051 | 66.5  | 121.4 |
| 1055 1N1W_30-1   | Wilson, 1997 | 45.54805  | -122.855576 | 78.2  | 155.9 |
| 1056 1N1W_31-1   | Wilson, 1997 | 45.531533 | -122.862248 | 61.9  | 205.2 |
| 1057 1N1W_33-2   | Wilson, 1997 | 45.523699 | -122.821234 | 69.9  | 204.0 |
| 1058 1N1W_33-4   | Wilson, 1997 | 45.533636 | -122.805462 | 136.2 | 143.8 |
| 1059 1N1W_033-5  | Wilson, 1997 | 45.534143 | -122.804629 | 145.4 | 136.2 |
| 1060 1N1W_34-2   | Wilson, 1997 | 45.526449 | -122.796138 | 104.7 | 180.9 |
| 1061 1N1W_34-4   | Wilson, 1997 | 45.533606 | -122.801928 | 144.4 | 135.2 |
| 1062 1N1W_34-5   | Wilson, 1997 | 45.532052 | -122.801236 | 135.5 | 146.2 |
| 1063 1N1W_36-1a  | Wilson, 1997 | 45.528344 | -122.760929 | 230.0 | 131.2 |
| 1064 1N1W_36-2   | Wilson, 1997 | 45.521986 | -122.752222 | 286.4 | 206.6 |



|                         |                     |           |             |       |       |       |
|-------------------------|---------------------|-----------|-------------|-------|-------|-------|
| 1065 1N2W_1-1           | Wilson, 1997        | 45.59269  | -122.871366 | 68.8  | 8.1   |       |
| 1066 1N2W_1-4           | Wilson, 1997        | 45.592266 | -122.873668 | 81.5  | 2.5   |       |
| 1067 1N2W_1-6           | Wilson, 1997        | 45.604386 | -122.871376 | 126.7 | 7.8   |       |
| 1068 1N2W_12-7          | Wilson, 1997        | 45.582707 | -122.871458 | 89.6  | 38.7  |       |
| 1069 1N2W_12-8          | Wilson, 1997        | 45.591754 | -122.87208  | 81.6  | 0.0   |       |
| 1070 1N2W_12-9          | Wilson, 1997        | 45.590744 | -122.873426 | 91.6  | 11.8  |       |
| 1071 1N2W_12-10         | Wilson, 1997        | 45.584721 | -122.870367 | 84.2  | 26.6  |       |
| 1072 1N2W_13-1          | Wilson, 1997        | 45.572905 | -122.867484 | 68.4  | 42.2  |       |
| 1073 1N2W_13-3a         | Wilson, 1997        | 45.570522 | -122.874717 | 71.5  | 44.7  |       |
| 1074 1S1W_1-2           | Wilson, 1997        | 45.510068 | -122.759379 | 197.8 | 222.2 |       |
| 1075 1S1W_2-3           | Wilson, 1997        | 45.509786 | -122.765733 | 162.2 | 222.9 |       |
| 1076 1S1W_02-6          | Wilson, 1997        | 45.507338 | -122.778957 | 126.8 | 220.9 |       |
| 1077 1S1W_5-4           | Wilson, 1997        | 45.507106 | -122.830603 | 56.5  | 279.9 |       |
| 1078 1S1W_12-2          | Wilson, 1997        | 45.501107 | -122.756009 | 175.7 | 167.2 |       |
| 1079 1S1W_24-8          | Wilson, 1997        | 45.474717 | -122.747171 | 86.2  | 113.3 |       |
| 1080 1S1E_019-1         | Wilson, 1997        | 45.463041 | -122.729453 | 136.2 | 151.5 |       |
| 1081 2S1E_02-1          | Wilson, 1997        | 45.420751 | -122.658116 | 12.5  | 0.0   | 26.2  |
| 1082 2S1E_03-1          | Wilson, 1997        | 45.423908 | -122.673552 | 80.4  | 70.0  | 85.3  |
| 1083 2S1E_6-3           | Wilson, 1997        | 45.426409 | -122.735462 | 81.7  | 143.9 | 204.8 |
| 1084 2S1E_7-1           | Wilson, 1997        | 45.404754 | -122.729075 | 64.5  | 10.2  |       |
| 1085 2S1E_08-2          | Wilson, 1997        | 45.405249 | -122.717297 | 32.6  | 1.8   |       |
| 1086 2S1E_08-4          | Wilson, 1997        | 45.404814 | -122.702474 | 72.9  | 22.0  |       |
| 1087 2S1E_18-1          | Wilson, 1997        | 45.400959 | -122.73042  | 44.6  | 88.8  |       |
| 1088 2S1E_018-3         | Wilson, 1997        | 45.399266 | -122.724871 | 44.6  | 14.7  |       |
| 1089 2S1E_19-2          | Wilson, 1997        | 45.378236 | -122.74002  | 63.6  | 156.6 |       |
| 1090 2S1E_19-3          | Wilson, 1997        | 45.385538 | -122.7368   | 39.8  | 18.5  |       |
| 1091 2S1E_019-4         | Wilson, 1997        | 45.376699 | -122.727821 | 64.9  | 129.5 |       |
| 1092 2S1E_20-1          | Wilson, 1997        | 45.388021 | -122.711149 | 106.0 | 23.7  |       |
| 1093 2S1E_20-3          | Wilson, 1997        | 45.377342 | -122.705584 | 57.8  | 66.3  |       |
| 1094 2S1E_20-5          | Wilson, 1997        | 45.386826 | -122.709097 | 114.2 | 74.3  |       |
| 1095 2S1E_20-6          | Wilson, 1997        | 45.385943 | -122.701769 | 95.6  | 0.0   |       |
| 1096 2S1E_20-9          | Wilson, 1997        | 45.381019 | -122.720861 | 40.0  | 30.3  |       |
| 1097 2S1E_020-12        | Wilson, 1997        | 45.38972  | -122.715978 | 61.0  | 19.5  |       |
| 1098 2S1E_21-1a         | Wilson, 1997        | 45.378766 | -122.698538 | 40.9  | 37.6  |       |
| 1099 2S1E_21-2          | Wilson, 1997        | 45.381898 | -122.701187 | 36.0  | 31.1  |       |
| 1100 2S1E_021-3         | Wilson, 1997        | 45.376002 | -122.686926 | 69.8  | 11.0  |       |
| 1101 2S1W_12-13         | Wilson, 1997        | 45.404954 | -122.748616 | 48.9  | 173.9 |       |
| 1102 2S1W_12-14         | Wilson, 1997        | 45.410969 | -122.748772 | 51.6  | 80.0  |       |
| 1103 OWRD Field Located | Wells et al., 2020a | 45.597736 | -123.14887  | 73.8  | 0.6   |       |
| 1104 OWRD Field Located | Wells et al., 2020a | 45.594723 | -123.082113 | 53.7  | 139.1 |       |
| 1105 OWRD Field Located | Wells et al., 2020a | 45.599465 | -123.006093 | 58.3  | 104.0 |       |
| 1106 OWRD Field Located | Wells et al., 2020a | 45.467441 | -123.000092 | 53.8  | 132.7 |       |
| 1107 OWRD Field Located | Wells et al., 2020a | 45.483023 | -123.05411  | 56.3  | 207.2 |       |
| 1108 OWRD Field Located | Wells et al., 2020a | 45.472568 | -123.04231  | 68.9  | 20.7  |       |
| 1109 OWRD Field Located | Wells et al., 2020a | 45.598456 | -123.00755  | 54.2  | 100.2 |       |
| 1110 OWRD Field Located | Wells et al., 2020a | 45.603654 | -123.009371 | 61.5  | 91.9  |       |
| 1111 OWRD Field Located | Wells et al., 2020a | 45.589099 | -123.079834 | 56.1  | 230.1 |       |
| 1112 OWRD Field Located | Wells et al., 2020a | 45.566968 | -123.089299 | 52.2  | 356.1 |       |

|                           |                     |           |             |      |       |
|---------------------------|---------------------|-----------|-------------|------|-------|
| 1113 OWRD Field Located   | Wells et al., 2020a | 45.576589 | -123.139873 | 53.0 | 154.1 |
| 1114 OWRD Field Located   | Wells et al., 2020a | 45.600801 | -123.000268 | 65.4 | 156.5 |
| 1115 OWRD Field Located   | Wells et al., 2020a | 45.592273 | -123.096536 | 58.0 | 279.0 |
| 1116 OWRD Field Located   | Wells et al., 2020a | 45.584392 | -123.144134 | 54.6 | 150.4 |
| 1117 OWRD Field Located   | Wells et al., 2020a | 45.594881 | -123.14549  | 62.7 | 43.8  |
| 1118 OWRD Field Located   | Wells et al., 2020a | 45.577916 | -123.0555   | 54.5 | 263.6 |
| 1119 OWRD Field Located   | Wells et al., 2020a | 45.491031 | -123.050742 | 56.3 | 201.7 |
| 1120 OWRD Field Located   | Wells et al., 2020a | 45.545081 | -123.106029 | 55.0 | 188.5 |
| 1121 OWRD Field Located   | Wells et al., 2020a | 45.589654 | -123.001538 | 60.1 | 147.3 |
| 1122 OWRD Field Located   | Wells et al., 2020a | 45.488386 | -123.066095 | 65.1 | 8.7   |
| 1123 OWRD Field Located   | Wells et al., 2020a | 45.48742  | -123.062791 | 58.2 | 38.3  |
| 1124 OWRD Field Located   | Wells et al., 2020a | 45.607604 | -123.022036 | 65.7 | 82.8  |
| 1125 OWRD Field Located   | Wells et al., 2020a | 45.570124 | -123.049221 | 55.9 | 321.1 |
| 1126 OWRD-Quarter/Quarter | Wells et al., 2020a | 45.56522  | -122.905579 | 68.9 | 143.9 |
| 1127 OWRD-Quarter/Quarter | Wells et al., 2020a | 45.590665 | -122.961536 | 60.4 | 97.2  |
| 1128 OWRD-Quarter/Quarter | Wells et al., 2020a | 45.587344 | -123.032337 | 59.9 | 171.5 |
| 1129 OWRD-Quarter/Quarter | Wells et al., 2020a | 45.605624 | -123.115607 | 62.9 | 86.6  |
| 1130 OWRD-Quarter/Quarter | Wells et al., 2020a | 45.605423 | -123.125935 | 59.0 | 77.3  |
| 1131 OWRD-Quarter/Quarter | Wells et al., 2020a | 45.569126 | -123.136456 | 51.1 | 142.6 |
| 1132 OWRD-Quarter/Quarter | Wells et al., 2020a | 45.554754 | -123.13153  | 64.1 | 68.9  |
| 1133 OWRD-Quarter/Quarter | Wells et al., 2020a | 45.463943 | -122.909886 | 63.1 | 78.6  |
| 1134 OWRD-Quarter/Quarter | Wells et al., 2020a | 45.485787 | -122.90959  | 59.2 | 224.4 |
| 1135 OWRD-Quarter/Quarter | Wells et al., 2020a | 45.551315 | -123.115896 | 57.5 | 129.5 |
| 1136 OWRD-Quarter/Quarter | Wells et al., 2020a | 45.576269 | -123.07465  | 49.1 | 303.9 |
| 1137 OWRD-Quarter/Quarter | Wells et al., 2020a | 45.583517 | -123.017674 | 61.8 | 188.3 |
| 1138 OWRD-Quarter/Quarter | Wells et al., 2020a | 45.565656 | -123.027572 | 57.0 | 244.8 |
| 1139 OWRD-Quarter/Quarter | Wells et al., 2020a | 45.569159 | -123.042827 | 54.9 | 252.4 |
| 1140 OWRD-Quarter/Quarter | Wells et al., 2020a | 45.576455 | -123.136305 | 52.1 | 126.8 |
| 1141 OWRD-Quarter/Quarter | Wells et al., 2020a | 45.587366 | -123.146834 | 53.9 | 123.7 |
| 1142 OWRD-Quarter/Quarter | Wells et al., 2020a | 45.565561 | -123.126219 | 51.3 | 133.6 |
| 1143 OWRD-Quarter/Quarter | Wells et al., 2020a | 45.467962 | -123.054189 | 77.7 | 15.0  |
| 1144 OWRD-Quarter/Quarter | Wells et al., 2020a | 45.493299 | -123.069408 | 47.1 | 37.0  |
| 1145 OWRD-Quarter/Quarter | Wells et al., 2020a | 45.489649 | -123.059448 | 46.2 | 49.3  |
| 1146 OWRD-Quarter/Quarter | Wells et al., 2020a | 45.474873 | -123.043993 | 61.2 | 103.6 |
| 1147 OWRD-Quarter/Quarter | Wells et al., 2020a | 45.474871 | -123.04918  | 61.4 | 22.4  |
| 1148 OWRD-Quarter/Quarter | Wells et al., 2020a | 45.475024 | -123.038806 | 57.9 | 97.6  |
| 1149 OWRD-Quarter/Quarter | Wells et al., 2020a | 45.478699 | -123.049268 | 54.9 | 91.1  |
| 1150 OWRD Field Located   | Wells et al., 2020a | 45.491043 | -123.05075  | 56.3 | 324.5 |
| 1151 OWRD-Quarter/Quarter | Wells et al., 2020a | 45.547508 | -123.047546 | 44.7 | 391.3 |
| 1152 OWRD-Quarter/Quarter | Wells et al., 2020a | 45.48609  | -123.01321  | 50.8 | 214.2 |
| 1153 OWRD-Quarter/Quarter | Wells et al., 2020a | 45.465009 | -122.992088 | 47.2 | 50.3  |
| 1154 OWRD-Quarter/Quarter | Wells et al., 2020a | 45.576418 | -122.971474 | 57.7 | 180.8 |
| 1155 OWRD-Quarter/Quarter | Wells et al., 2020a | 45.562156 | -122.971525 | 53.4 | 244.2 |
| 1156 OWRD-Quarter/Quarter | Wells et al., 2020a | 45.547647 | -122.971665 | 56.6 | 302.3 |
| 1157 OWRD Field Located   | Wells et al., 2020a | 45.501066 | -122.948656 | 37.8 | 367.3 |
| 1158 OWRD-Quarter/Quarter | Wells et al., 2020a | 45.565639 | -122.966653 | 56.7 | 248.1 |
| 1159 OWRD-Quarter/Quarter | Wells et al., 2020a | 45.579918 | -122.93064  | 65.8 | 197.5 |
| 1160 OWRD-Quarter/Quarter | Wells et al., 2020a | 45.579822 | -122.936026 | 61.9 | 147.9 |

|                            |                     |           |             |       |       |       |
|----------------------------|---------------------|-----------|-------------|-------|-------|-------|
| 1161 OWRD-Quarter/Quarter  | Wells et al., 2020a | 45.569068 | -123.15192  | 60.1  | 139.4 |       |
| 1162 PP1560                | Wells et al., 2020a | 45.543887 | -122.8682   | 64.1  | 164.0 |       |
| 1163 PP1560                | Wells et al., 2020a | 45.523598 | -122.868099 | 64.5  | 264.4 |       |
| 1164 PP1560                | Wells et al., 2020a | 45.513308 | -122.868018 | 56.2  | 256.2 | 594.1 |
| 1165 PP1560                | Wells et al., 2020a | 45.507115 | -122.868035 | 47.5  | 247.5 |       |
| 1166 PP1560                | Wells et al., 2020a | 45.490748 | -122.86798  | 69.1  | 269.0 |       |
| 1167 PP1560                | Wells et al., 2020a | 45.519537 | -122.949518 | 57.9  | 357.8 | 693.1 |
| 1168 PP1560                | Wells et al., 2020a | 45.522445 | -122.954793 | 58.5  | 358.4 | 693.7 |
| 1169 PP1560                | Wells et al., 2020a | 45.52784  | -122.977994 | 57.3  | 357.2 | 692.5 |
| 1170 PP1560                | Wells et al., 2020a | 45.51251  | -122.858432 | 62.9  | 262.9 |       |
| 1171 PP1560                | Wells et al., 2020a | 45.515111 | -122.893738 | 57.5  | 257.4 | 592.8 |
| 1172 PP1560                | Wells et al., 2020a | 45.556319 | -123.060138 | 49.4  | 349.4 |       |
| 1173 PP1560                | Wells et al., 2020a | 45.595985 | -123.043241 | 60.2  | 260.2 |       |
| 1174 PP1560                | Wells et al., 2020a | 45.602369 | -123.034362 | 63.6  | 163.6 |       |
| 1175 PP1560                | Wells et al., 2020a | 45.551883 | -123.067157 | 58.2  | 358.1 |       |
| 1176 PP1560                | Wells et al., 2020a | 45.54998  | -123.085928 | 58.4  | 258.4 |       |
| 1177 PP1560                | Wells et al., 2020a | 45.550369 | -123.128531 | 58.6  | 158.6 |       |
| 1178 PP1560                | Wells et al., 2020a | 45.569632 | -123.158763 | 65.4  | 65.4  |       |
| 1179 PP1560                | Wells et al., 2020a | 45.561401 | -123.141007 | 56.6  | 56.6  |       |
| 1180 PP1560                | Wells et al., 2020a | 45.542639 | -123.088035 | 55.4  | 255.4 |       |
| 1181 tCRBG seismic line 1  | Liberty, 2002       | 45.828026 | -122.792471 | 2.5   | 104.9 | 226.8 |
| 1182 tCRBG seismic line 1  | Liberty, 2002       | 45.803945 | -122.791084 | 2.5   | 95.1  | 308.5 |
| 1183 tCRBG seismic line 1  | Liberty, 2002       | 45.79176  | -122.782514 | 2.4   | 110.0 | 567.2 |
| 1184 tCRBG seismic line 1  | Liberty, 2002       | 45.779442 | -122.773091 | 2.3   | 100.1 | 374.3 |
| 1185 tCRBG seismic line 1  | Liberty, 2002       | 45.759998 | -122.762755 | 2.5   | 285.1 | 498.3 |
| 1186 tCRBG seismic line 1  | Liberty, 2002       | 45.740083 | -122.761333 | 2.4   | 299.9 | 635.2 |
| 1187 tCRBG seismic line 1  | Liberty, 2002       | 45.706566 | -122.766665 | 2.4   | 340.2 | 675.4 |
| 1188 tCRBG seismic line 1  | Liberty, 2002       | 45.680438 | -122.772498 | 2.4   | 299.9 | 543.8 |
| 1189 tCRBG seismic line 1  | Liberty, 2002       | 45.665409 | -122.764688 | 2.7   | 375.2 | 710.5 |
| 1190 tCRBG seismic line 1  | Liberty, 2002       | 45.653387 | -122.758358 | 2.8   | 400.0 | 735.2 |
| 1191 tCRBG seismic line 2  | Liberty, 2002       | 45.616051 | -122.670789 | 2.9   | 449.1 | 784.3 |
| 1192 tCRBG seismic line 2  | Liberty, 2002       | 45.605337 | -122.622041 | 2.8   | 439.9 | 775.1 |
| 1193 tCRBG seismic line 2  | Liberty, 2002       | 45.601421 | -122.574829 | 3.0   | 400.1 | 735.5 |
| 1194 tCRBG seismic line 2  | Liberty, 2002       | 45.589687 | -122.531164 | 3.0   | 350.2 | 517.9 |
| 1195 tCRBG seismic line 2  | Liberty, 2002       | 45.582543 | -122.496577 | 2.9   | 330.0 | 452.0 |
| 1196 tCRBG seismic line 2  | Liberty, 2002       | 45.577606 | -122.471823 | 3.2   | 310.1 | 399.6 |
| 1197 MTD 1                 | Wilson, 1997        | 45.59852  | -122.615755 | 9.6   | 433.6 | 768.7 |
| 1198 GT_000897_GB-5        | Roe and Madin, 2013 | 45.595394 | -122.779941 | 10.1  | 21.1  |       |
| 1199 MULT_FALLS            | OWRD CRBG database  | 45.571848 | -122.115116 | 491.3 | 127.1 | 497.7 |
| 1200 CRBG surface exposure | Wells et al., 2020a | 45.855872 | -122.802964 | 9.4   | 0.0   |       |
| 1201 CRBG surface exposure | Wells et al., 2020a | 45.525269 | -122.70033  | 60.2  | 0.0   |       |
| 1202 CRBG surface exposure | Wells et al., 2020a | 45.575404 | -122.760147 | 20.7  | 0.0   |       |
| 1203 CRBG surface exposure | Wells et al., 2020a | 45.614422 | -122.802822 | 45.7  | 0.0   |       |
| 1204 CRBG surface exposure | Wells et al., 2020a | 45.634588 | -122.826766 | 9.7   | 0.0   |       |
| 1205 CRBG surface exposure | Wells et al., 2020a | 45.656513 | -122.879623 | 123.5 | 0.0   |       |
| 1206 CRBG surface exposure | Wells et al., 2020a | 45.694045 | -122.870188 | 7.2   | 0.0   |       |
| 1207 CRBG surface exposure | Wells et al., 2020a | 45.71273  | -122.878818 | 77.3  | 0.0   |       |
| 1208 CRBG surface exposure | Wells et al., 2020a | 45.85552  | -122.867072 | 91.0  | 0.0   |       |

|                            |                     |           |             |       |       |       |
|----------------------------|---------------------|-----------|-------------|-------|-------|-------|
| 1209 CRBG surface exposure | Wells et al., 2020a | 45.889225 | -122.816913 | 67.4  | 0.1   |       |
| 1210 CRBG surface exposure | Wells et al., 2020a | 45.893424 | -122.723364 | 114.0 | 0.0   |       |
| 1211 CRBG surface exposure | Wells et al., 2020a | 45.900529 | -122.710663 | 194.4 | 0.0   |       |
| 1212 CRBG surface exposure | Wells et al., 2020a | 45.864951 | -122.685384 | 28.3  | 0.0   |       |
| 1213 CRBG surface exposure | Wells et al., 2020a | 45.539764 | -122.262886 | 54.4  | 0.0   |       |
| 1214 CRBG surface exposure | Wells et al., 2020a | 45.855172 | -122.764759 | 3.8   | 0.1   |       |
| 1215 CRBG surface exposure | Wells et al., 2020a | 45.851689 | -122.768199 | 3.3   | 0.0   |       |
| 1216 CRBG surface exposure | Wells et al., 2020a | 45.836639 | -122.750533 | 6.8   | 0.1   |       |
| 1217 CRBG surface exposure | Wells et al., 2020a | 45.83886  | -122.76432  | 3.7   | 0.1   |       |
| 1218 CRBG surface exposure | Wells et al., 2020a | 45.842099 | -122.755224 | 3.8   | 0.1   |       |
| 1219 CRBG surface exposure | Wells et al., 2020a | 45.844362 | -122.768153 | 6.7   | 0.0   |       |
| 1220 CRBG surface exposure | Wells et al., 2020a | 45.84077  | -122.769729 | 6.7   | 0.0   |       |
| 1221 CRBG surface exposure | Wells et al., 2020a | 45.841694 | -122.759379 | 2.7   | 0.0   |       |
| 1222 CRBG surface exposure | Wells et al., 2020a | 45.711849 | -122.886221 | 128.0 | 0.0   |       |
| 1223 CRBG surface exposure | Wells et al., 2020a | 45.698212 | -122.878215 | 188.3 | 0.0   |       |
| 1224 CRBG surface exposure | Wells et al., 2020a | 45.697386 | -122.890316 | 238.5 | 0.0   |       |
| 1225 CRBG surface exposure | Wells et al., 2020a | 45.713205 | -122.951122 | 296.7 | 0.0   |       |
| 1226 CRBG surface exposure | Wells et al., 2020a | 45.775318 | -122.988694 | 422.9 | 0.0   | 85.6  |
| 1227 CRBG surface exposure | Wells et al., 2020a | 45.767745 | -122.955361 | 324.8 | 0.0   | 110.6 |
| 1228 CRBG surface exposure | Wells et al., 2020a | 45.765206 | -122.934614 | 173.8 | 0.0   |       |
| 1229 CRBG surface exposure | Wells et al., 2020a | 45.748374 | -122.913446 | 114.7 | 0.0   |       |
| 1230 CRBG surface exposure | Wells et al., 2020a | 45.747678 | -122.906739 | 115.6 | 0.0   |       |
| 1231 CRBG surface exposure | Wells et al., 2020a | 45.752719 | -122.911752 | 149.0 | 0.0   |       |
| 1232 CRBG surface exposure | Wells et al., 2020a | 45.755105 | -122.916591 | 197.9 | 0.0   |       |
| 1233 CRBG surface exposure | Wells et al., 2020a | 45.758508 | -122.911709 | 207.4 | 0.0   |       |
| 1234 CRBG surface exposure | Wells et al., 2020a | 45.758356 | -122.905332 | 155.1 | 0.0   |       |
| 1235 CLAC_59817            | OWRD                | 45.326632 | -122.34921  | 119.7 | 254.7 | 467.9 |
| 1236 MULT_106000           | OWRD                | 45.512602 | -122.686656 | 50.2  | 72.7  | 366.1 |
| 1237 MULT_1013             | OWRD                | 45.540661 | -122.697843 | 15.5  | 87.8  |       |
| 1238 MULT_1017             | OWRD                | 45.547887 | -122.707758 | 11.5  | 74.3  | 287.7 |
| 1239 MULT_1018             | OWRD                | 45.546637 | -122.71037  | 11.7  | 59.6  |       |
| 1240 MULT_1038             | OWRD                | 45.524548 | -122.694516 | 40.3  | 69.3  |       |
| 1241 MULT_1083             | OWRD                | 45.522548 | -122.679254 | 12.3  | 106.8 |       |
| 1242 MULT_1061             | OWRD                | 45.52117  | -122.681668 | 19.8  | 117.3 |       |
| 1243 MULT_1064             | OWRD                | 45.520747 | -122.677909 | 12.1  | 113.0 |       |
| 1244 MULT_1099             | OWRD                | 45.527268 | -122.624026 | 68.1  | 396.1 | 670.6 |
| 1245 MULT_2732             | OWRD                | 45.518158 | -122.678406 | 16.5  | 118.0 |       |
| 1246 MULT_2745             | OWRD                | 45.512257 | -122.678217 | 25.6  | 108.5 |       |
| 1247 MULT_2743             | OWRD                | 45.51025  | -122.680264 | 40.4  | 67.8  | 281.3 |
| 1248 MULT_2747             | OWRD                | 45.519272 | -122.683971 | 31.8  | 82.1  |       |
| 1249 MULT_2750             | OWRD                | 45.513169 | -122.68312  | 41.0  | 71.2  |       |
| 1250 MULT_2726             | OWRD                | 45.518206 | -122.679228 | 18.3  | 111.9 |       |
| 1251 MULT_5132             | OWRD                | 45.517928 | -122.680494 | 22.2  | 75.6  |       |
| 1252 MULT_2739             | OWRD                | 45.514641 | -122.679982 | 26.8  | 67.4  | 280.7 |
| 1253 MULT_56740            | OWRD                | 45.514979 | -122.259842 | 174.9 | 64.9  | 400.2 |
| 1254 MULT_56742            | OWRD                | 45.497927 | -122.279799 | 47.4  | 43.5  | 378.9 |
| 1255 MULT_2198             | OWRD                | 45.485429 | -122.315353 | 205.1 | 311.2 | 646.5 |
| 1256 CLAC_315              | OWRD                | 45.443471 | -122.624212 | 31.7  | 99.4  | 129.8 |

|      |                                      |                      |           |             |       |       |       |
|------|--------------------------------------|----------------------|-----------|-------------|-------|-------|-------|
| 1257 | MULT_841                             | OWRD                 | 45.564729 | -122.739995 | 11.2  | 23.7  |       |
| 1258 | MULT_56735                           | OWRD                 | 45.557974 | -122.731655 | 12.4  | 20.6  |       |
| 1259 | MULT_5135                            | OWRD                 | 45.525177 | -122.672369 | 10.5  | 137.3 | 381.1 |
| 1260 | MULT_1732                            | OWRD                 | 45.621241 | -122.800141 | 8.0   | 59.8  |       |
| 1261 | COLU_3312                            | OWRD                 | 45.828719 | -122.838708 | 9.6   | 25.5  |       |
| 1262 | COLU_3275                            | OWRD                 | 45.840505 | -122.862846 | 48.5  | 29.0  |       |
| 1263 | COLU_3274                            | OWRD                 | 45.840388 | -122.862866 | 47.3  | 27.8  |       |
| 1264 | COLU_3273                            | OWRD                 | 45.847845 | -122.867097 | 78.1  | 45.8  |       |
| 1265 | COLU_121                             | OWRD                 | 45.830176 | -122.838517 | 11.1  | 23.6  |       |
| 1266 | MULT_2740                            | OWRD                 | 45.512184 | -122.683945 | 46.7  | 67.4  |       |
| 1267 | MULT_105999                          | OWRD                 | 45.512548 | -122.686376 | 50.0  | 53.4  |       |
| 1268 | CRBG elevation<br>interpretation     | Swanson et al., 1993 | 45.353391 | -122.298687 | 261.8 | 105.7 | 441.0 |
| 1269 | CRBG elevation<br>interpretation     | Swanson et al., 1993 | 45.370313 | -122.324427 | 192.4 | 160.4 | 495.6 |
| 1270 | CRBG elevation<br>interpretation     | Swanson et al., 1993 | 45.379985 | -122.31047  | 248.9 | 271.4 | 561.4 |
| 1271 | CRBG elevation<br>interpretation     | Swanson et al., 1993 | 45.39867  | -122.351783 | 203.0 | 195.9 | 531.3 |
| 1272 | CRBG elevation<br>interpretation     | Swanson et al., 1993 | 45.393815 | -122.412412 | 62.9  | 178.7 | 513.9 |
| 1273 | CRBG elevation<br>interpretation     | Swanson et al., 1993 | 45.391167 | -122.43126  | 43.5  | 116.0 | 451.4 |
| 1274 | CRBG elevation<br>interpretation     | Swanson et al., 1993 | 45.419807 | -122.459434 | 166.8 | 253.7 | 588.9 |
| 1275 | COLU_496                             | Roe and Madin, 2013  | 45.724185 | -122.877811 | 21.7  | 22.9  |       |
| 1276 | COLU_27                              | Roe and Madin, 2013  | 45.72696  | -122.880209 | 33.0  | 50.7  |       |
| 1277 | COLU_3206                            | OWRD                 | 45.724501 | -122.887965 | 77.6  | 57.2  |       |
| 1278 | COLU_3105                            | Roe and Madin, 2013  | 45.741231 | -122.880129 | 22.2  | 53.9  |       |
| 1279 | ODOT 17476 (50890)_B-1               | Roe and Madin, 2013  | 45.741196 | -122.910103 | 28.5  | 6.3   |       |
| 1280 | COLU_50898                           | Roe and Madin, 2013  | 45.741007 | -122.894214 | 29.9  | 28.1  |       |
| 1281 | ODOT 17994 (54728)_B-1               | Roe and Madin, 2013  | 45.741195 | -122.891261 | 19.8  | 8.8   |       |
| 1282 | COLU_52047                           | Roe and Madin, 2013  | 45.744779 | -122.896945 | 80.8  | 25.6  |       |
| 1283 | COLU_52245                           | Roe and Madin, 2013  | 45.746825 | -122.895129 | 64.3  | 23.2  |       |
| 1284 | COLU_52243                           | Roe and Madin, 2013  | 45.746361 | -122.897271 | 87.4  | 40.8  |       |
| 1285 | COLU_52242                           | Roe and Madin, 2013  | 45.74689  | -122.897629 | 89.0  | 35.4  |       |
| 1286 | Top CRBG elevation<br>interpretation | Swanson et al., 1993 | 45.821284 | -122.877424 | 43.8  | 71.8  |       |
| 1287 | CRBG elevation<br>interpretation     | Swanson et al., 1993 | 45.838335 | -122.87722  | 95.0  | 11.8  |       |
| 1288 | MULT_5                               | Roe and Madin, 2013  | 45.651765 | -122.899127 | 357.0 | 4.6   | 214.9 |
| 1289 | ODOT 20136 (70193)_BH-1              | Roe and Madin, 2013  | 45.6269   | -122.818026 | 8.5   | 5.2   |       |
| 1290 | ODOT 20136 (70193)_BH-2              | Roe and Madin, 2013  | 45.627106 | -122.817691 | 6.6   | 13.9  |       |
| 1291 | ODOT 20136 (70193)_BH-4              | Roe and Madin, 2013  | 45.62796  | -122.816057 | 2.7   | 14.3  |       |
| 1292 | ODOT 20136 (70194)_BH-5              | Roe and Madin, 2013  | 45.628428 | -122.815439 | 6.7   | 44.8  |       |
| 1293 | ODOT 20136 (70194)_BH-8              | Roe and Madin, 2013  | 45.628785 | -122.814554 | 8.2   | 40.2  |       |
| 1294 | ODOT 20136 (70194)_BH-7              | Roe and Madin, 2013  | 45.629196 | -122.815072 | 7.4   | 42.5  |       |
| 1295 | MULT_4217                            | Roe and Madin, 2013  | 45.620725 | -122.799338 | 9.0   | 117.5 |       |

|                                                   |                      |           |             |       |      |       |
|---------------------------------------------------|----------------------|-----------|-------------|-------|------|-------|
| ODOT 18940 (60014)_TB-1296 05                     | Roe and Madin, 2013  | 45.618068 | -122.80697  | 23.4  | 6.6  |       |
| ODOT 18940 (60014)_TB-1297 06                     | Roe and Madin, 2013  | 45.617933 | -122.806766 | 22.6  | 7.7  |       |
| ODOT 18940 (60013)_TB-1298 03                     | Roe and Madin, 2013  | 45.617797 | -122.806936 | 21.3  | 7.9  |       |
| ODOT 18940 (60014)_TB-1299 01                     | Roe and Madin, 2013  | 45.617783 | -122.806557 | 14.1  | 11.3 |       |
| ODOT 18940 (60014)_TB-1300 07; map in plate 60012 | Roe and Madin, 2013  | 45.617728 | -122.806453 | 17.2  | 5.6  |       |
| ODOT 18940 (60017)_TB-1301 14; map in plate 60012 | Roe and Madin, 2013  | 45.617662 | -122.806536 | 20.5  | 9.8  |       |
| ODOT 18940 (60015)_TB-1302 19; map in plate 60012 | Roe and Madin, 2013  | 45.617706 | -122.806411 | 23.9  | 7.4  |       |
| ODOT 18940 (60015)_TB-1303 18; map in plate 60012 | Roe and Madin, 2013  | 45.617682 | -122.806364 | 23.9  | 0.7  |       |
| ODOT 18940 (60015)_TB-1304 08; map in plate 60012 | Roe and Madin, 2013  | 45.617627 | -122.806245 | 24.0  | 2.1  |       |
| ODOT 18940 (60017)_TB-1305 15; map in plate 60012 | Roe and Madin, 2013  | 45.617636 | -122.806581 | 20.5  | 8.0  |       |
| 1306 GT_000503_B-5                                | Roe and Madin, 2013  | 45.611424 | -122.792696 | 9.7   | 24.4 |       |
| 1307 GT_000503_B-2                                | Roe and Madin, 2013  | 45.610853 | -122.79381  | 10.3  | 22.2 |       |
| 1308 GT_000503_B-4                                | Roe and Madin, 2013  | 45.611292 | -122.791456 | 9.4   | 32.2 |       |
| 1309 GT_000503_B-3                                | Roe and Madin, 2013  | 45.61238  | -122.791917 | 9.7   | 36.6 |       |
| GT_000897_B-1; FLAC                               |                      |           |             |       |      |       |
| 1310 analysis                                     | Roe and Madin, 2013  | 45.593823 | -122.778061 | 4.4   | 19.6 |       |
| 1311 GT_006174_P-1                                | Roe and Madin, 2013  | 45.593483 | -122.777846 | 8.0   | 19.3 |       |
| 1312 GT_003252_Well                               | Roe and Madin, 2013  | 45.589515 | -122.783809 | 140.3 | 16.9 |       |
| 1313 GT_006174_P-2                                | Roe and Madin, 2013  | 45.59187  | -122.77638  | 10.7  | 20.2 | 264.0 |
| 1314 GT_001453_B-4                                | Roe and Madin, 2013  | 45.588869 | -122.772715 | 10.9  | 17.0 |       |
| 1315 GT_001453_B-5                                | Roe and Madin, 2013  | 45.588478 | -122.772256 | 11.4  | 16.0 |       |
| 1316 GT_001453_B-2                                | Roe and Madin, 2013  | 45.588271 | -122.772524 | 11.0  | 12.3 |       |
| 1317 GT_001453_B-3                                | Roe and Madin, 2013  | 45.588326 | -122.77294  | 10.6  | 8.8  |       |
| 1318 GT_003234_B-1                                | Roe and Madin, 2013  | 45.586685 | -122.770813 | 11.4  | 13.2 |       |
| 1319 GT_003234_B-2                                | Roe and Madin, 2013  | 45.586373 | -122.770683 | 11.2  | 12.1 |       |
| 1320 GT_003234_B-3                                | Roe and Madin, 2013  | 45.585792 | -122.769862 | 10.9  | 10.6 |       |
| 1321 GT_000293_B-19                               | Roe and Madin, 2013  | 45.580475 | -122.760893 | 11.1  | 32.5 |       |
| 1322 GT_000293_B-16                               | Roe and Madin, 2013  | 45.579827 | -122.760576 | 11.6  | 31.1 |       |
| 1323 GT_000293_B-11                               | Roe and Madin, 2013  | 45.579363 | -122.762186 | 12.1  | 14.5 |       |
| 1324 GT_000293_B-7                                | Roe and Madin, 2013  | 45.579247 | -122.761453 | 11.8  | 13.6 |       |
| 1325 GT_000293_B-15                               | Roe and Madin, 2013  | 45.579442 | -122.760796 | 11.6  | 25.6 |       |
| 1326 GT_000293_B-2                                | Roe and Madin, 2013  | 45.578707 | -122.761431 | 12.2  | 18.0 |       |
| 1327 GT_000293_B-3                                | Roe and Madin, 2013  | 45.578783 | -122.761013 | 12.1  | 15.4 |       |
| 1328 GT_000293_B-1                                | Roe and Madin, 2013  | 45.578538 | -122.761927 | 12.3  | 15.6 |       |
| 1329 GT_000293_B-22                               | Roe and Madin, 2013  | 45.578688 | -122.757138 | 11.6  | 61.3 |       |
| Top CRBG elevation                                |                      |           |             |       |      |       |
| 1330 interpretation                               | Swanson et al., 1993 | 45.578124 | -122.757112 | 10.6  | 17.9 |       |
| 1331 MTL-168-170_B-3                              | Roe and Madin, 2013  | 45.572418 | -122.753234 | 10.9  | 19.1 |       |
| 1332 MTL-163-167_B-1                              | Roe and Madin, 2013  | 45.575388 | -122.749917 | 11.9  | 19.5 |       |
| 1333 GT_001459_B-1                                | Roe and Madin, 2013  | 45.571561 | -122.748005 | 10.7  | 29.9 |       |
| 1334 CSO alternate_WGB-1                          | Roe and Madin, 2013  | 45.577097 | -122.744426 | 2.6   | 10.2 |       |
| 1335 GT_003367_B-1                                | Roe and Madin, 2013  | 45.567721 | -122.746407 | 12.9  | 18.4 |       |
| 1336 CSO alternate_WGB-5                          | Roe and Madin, 2013  | 45.568721 | -122.741305 | 12.1  | 27.6 |       |

|                           |                     |           |             |       |      |       |
|---------------------------|---------------------|-----------|-------------|-------|------|-------|
| 1337 CSO alternate_WGB-7  | Roe and Madin, 2013 | 45.570021 | -122.738921 | 2.6   | 7.7  | 251.6 |
| 1338 CSO alternate_WGB-3  | Roe and Madin, 2013 | 45.570333 | -122.738518 | 2.6   | 6.5  |       |
| 1339 MTL-8749-8758A_B-9   | Roe and Madin, 2013 | 45.563624 | -122.74841  | 22.9  | 0.6  |       |
| 1340 GT_001975_B-1        | Roe and Madin, 2013 | 45.563285 | -122.742509 | 11.3  | 15.6 |       |
| 1341 GT_000305_B-1        | Roe and Madin, 2013 | 45.564205 | -122.741546 | 11.6  | 14.0 |       |
| 1342 GT_000308_B-2        | Roe and Madin, 2013 | 45.560847 | -122.74078  | 11.9  | 13.4 |       |
| 1343 GT_000308_B-1        | Roe and Madin, 2013 | 45.560957 | -122.740651 | 11.9  | 14.4 |       |
| PBOT Kittridge NW         |                     |           |             |       |      |       |
| 1344 industrial_B-1       | Roe and Madin, 2013 | 45.555924 | -122.732471 | 11.7  | 22.1 |       |
| PBOT Kittridge NW         |                     |           |             |       |      |       |
| 1345 industrial_B-2       | Roe and Madin, 2013 | 45.55645  | -122.732038 | 11.8  | 24.6 |       |
| 1346 GT_000311_B-3        | Roe and Madin, 2013 | 45.556871 | -122.732055 | 12.0  | 24.2 |       |
| PBOT Kittridge NW         |                     |           |             |       |      |       |
| 1347 industrial_B-3       | Roe and Madin, 2013 | 45.557007 | -122.731551 | 12.0  | 22.1 |       |
| 1348 GT_000311_B-1        | Roe and Madin, 2013 | 45.557375 | -122.731633 | 12.4  | 21.8 |       |
| 1349 GT_000310_B-2        | Roe and Madin, 2013 | 45.5581   | -122.72911  | 12.7  | 13.3 |       |
| 1350 GT_000310_B-3        | Roe and Madin, 2013 | 45.558483 | -122.727752 | 11.4  | 12.0 |       |
| 1351 GT_000310_B-5        | Roe and Madin, 2013 | 45.55867  | -122.72902  | 12.2  | 13.7 |       |
| 1352 GT_000310_B-1        | Roe and Madin, 2013 | 45.559154 | -122.728744 | 12.6  | 9.6  |       |
| 1353 GT_002342_B-1        | Roe and Madin, 2013 | 45.55124  | -122.726215 | 12.0  | 17.2 |       |
| 1354 GT_002342_B-3        | Roe and Madin, 2013 | 45.551475 | -122.726463 | 12.0  | 16.6 |       |
| 1355 GT_002342_B-2        | Roe and Madin, 2013 | 45.551613 | -122.726065 | 11.7  | 17.2 |       |
| 1356 MTL-5452_B-2         | Roe and Madin, 2013 | 45.555695 | -122.720263 | 10.7  | 47.3 | 352.1 |
| 1357 GT_001504_B-3        | Roe and Madin, 2013 | 45.539664 | -122.720931 | 76.1  | 8.4  |       |
| 1358 GT_001504_B-1        | Roe and Madin, 2013 | 45.539483 | -122.720654 | 74.1  | 7.0  |       |
| 1359 GT_001509_B-1        | Roe and Madin, 2013 | 45.539562 | -122.719914 | 57.0  | 6.4  |       |
| 1360 GT_001509_B-2        | Roe and Madin, 2013 | 45.539408 | -122.719721 | 57.4  | 5.5  |       |
| 1361 GT_001509_B-5        | Roe and Madin, 2013 | 45.538486 | -122.71931  | 66.6  | 4.5  |       |
| 1362 GT_001501_B-3        | Roe and Madin, 2013 | 45.538326 | -122.71897  | 65.5  | 10.1 |       |
| 1363 MTL-10452-10460_B-6  | Roe and Madin, 2013 | 45.537368 | -122.714457 | 26.2  | 3.4  |       |
| 1364 MTL-10452-10460_B-12 | Roe and Madin, 2013 | 45.53667  | -122.712607 | 27.5  | 0.7  |       |
| 1365 ODOT_TB801           | OWRD                | 45.538361 | -122.711219 | 12.9  | 16.6 | 260.4 |
| 1366 GT_002805_B-1        | Roe and Madin, 2013 | 45.531197 | -122.712119 | 148.1 | 3.4  |       |
| 1367 GT_002578_B-1        | Roe and Madin, 2013 | 45.527411 | -122.71329  | 219.1 | 1.5  |       |
| 1368 GT_006716_B-1        | Roe and Madin, 2013 | 45.526881 | -122.704833 | 130.4 | 3.3  |       |
| 1369 GT_002790_B-1        | Roe and Madin, 2013 | 45.528043 | -122.702764 | 67.4  | 27.4 |       |
| 1370 GT_002790_B-2        | Roe and Madin, 2013 | 45.528045 | -122.702603 | 65.4  | 16.6 |       |
| 1371 MTL-5553-5556_B-2    | Roe and Madin, 2013 | 45.527042 | -122.702145 | 72.0  | 9.2  |       |
| 1372 MTL-5553-5556_B-1    | Roe and Madin, 2013 | 45.52627  | -122.701398 | 70.1  | 10.7 |       |
| 1373 GT_003063_B-5        | Roe and Madin, 2013 | 45.525768 | -122.701714 | 104.9 | 3.4  |       |
| 1374 GT_002892_PB-723A    | Roe and Madin, 2013 | 45.542994 | -122.693742 | 9.7   | 66.4 |       |
| 1375 GT_002892_PB-720R    | Roe and Madin, 2013 | 45.543299 | -122.693479 | 10.3  | 63.3 |       |
| 1376 MTL-2186-2206_B-7    | Roe and Madin, 2013 | 45.524085 | -122.705491 | 98.3  | 5.6  |       |
| 1377 MTL-2186-2206_B-8    | Roe and Madin, 2013 | 45.524212 | -122.703376 | 83.0  | 4.4  |       |
| 1378 MTL-2186-2206_B-10   | Roe and Madin, 2013 | 45.524155 | -122.701275 | 66.7  | 1.8  |       |
| 1379 MTL-2186-2206_B-11   | Roe and Madin, 2013 | 45.524519 | -122.701056 | 64.3  | 1.2  |       |
| 1380 MTL-2186-2206_B-17   | Roe and Madin, 2013 | 45.524858 | -122.700835 | 62.0  | 0.0  |       |
| 1381 MTL-2186-2206_B-18   | Roe and Madin, 2013 | 45.525235 | -122.700548 | 60.5  | 1.4  |       |
| 1382 GT_003063_B-7        | Roe and Madin, 2013 | 45.52454  | -122.701821 | 95.0  | 3.3  |       |

|                               |                      |           |             |       |      |
|-------------------------------|----------------------|-----------|-------------|-------|------|
| 1383 GT_003063_B-6            | Roe and Madin, 2013  | 45.524852 | -122.702298 | 106.6 | 3.3  |
| 1384 GT_003063_B-4A           | Roe and Madin, 2013  | 45.52516  | -122.701689 | 105.2 | 1.9  |
| 1385 GT_003063_B-3            | Roe and Madin, 2013  | 45.525096 | -122.701386 | 96.6  | 7.7  |
| 1386 GT_003063_B-2            | Roe and Madin, 2013  | 45.524834 | -122.701513 | 98.7  | 6.6  |
| 1387 GT_003063_B-1            | Roe and Madin, 2013  | 45.52473  | -122.701588 | 97.1  | 5.6  |
| 1388 GT_006556_B-2            | Roe and Madin, 2013  | 45.523194 | -122.696609 | 52.5  | 16.8 |
| 1389 GT_006556_B-4            | Roe and Madin, 2013  | 45.523181 | -122.69638  | 50.8  | 17.3 |
| 1390 GT_006556_B-1            | Roe and Madin, 2013  | 45.523046 | -122.696372 | 52.6  | 17.8 |
| Top CRBG elevation            |                      |           |             |       |      |
| 1391 interpretation           | Swanson et al., 1993 | 45.523249 | -122.691973 | 33.1  | 64.5 |
| 1392 GT_003602_B-1            | Roe and Madin, 2013  | 45.520997 | -122.692532 | 26.3  | 25.1 |
| 1393 GT_005086_B-5            | Roe and Madin, 2013  | 45.519024 | -122.693042 | 42.8  | 18.1 |
| 1394 GT_005090_B-3            | Roe and Madin, 2013  | 45.518241 | -122.694987 | 41.0  | 12.7 |
| 1395 GT_006748_B-1            | Roe and Madin, 2013  | 45.518084 | -122.696508 | 82.2  | 9.3  |
| 1396 GT_005106_B-2            | Roe and Madin, 2013  | 45.516878 | -122.694792 | 62.6  | 7.4  |
| 1397 GT_005106_B-1            | Roe and Madin, 2013  | 45.516644 | -122.694509 | 59.3  | 6.3  |
| 1398 GT_000206_TP-2           | Roe and Madin, 2013  | 45.514743 | -122.694075 | 63.8  | 6.5  |
| 1399 GT_000206_TP-1           | Roe and Madin, 2013  | 45.514723 | -122.693994 | 69.7  | 7.5  |
| 1400 GT_000206_TP-3           | Roe and Madin, 2013  | 45.514438 | -122.694172 | 71.7  | 5.6  |
| 1401 GT_005112_B-1            | Roe and Madin, 2013  | 45.514199 | -122.692408 | 68.8  | 7.5  |
| 1402 MTL-10879-10885_B-7      | Roe and Madin, 2013  | 45.506667 | -122.685738 | 72.0  | 3.1  |
| 1403 MTL-10879-10885_B-6      | Roe and Madin, 2013  | 45.506156 | -122.685559 | 78.0  | 3.0  |
| 1404 GT_000069_B-2            | Roe and Madin, 2013  | 45.506129 | -122.685078 | 66.5  | 12.8 |
| 1405 GT_000069_B-1            | Roe and Madin, 2013  | 45.506074 | -122.685218 | 68.1  | 8.6  |
| 1406 GT_005932_B-7            | Roe and Madin, 2013  | 45.505885 | -122.684813 | 64.3  | 11.6 |
| 1407 GT_005932_B-8            | Roe and Madin, 2013  | 45.505773 | -122.684692 | 63.2  | 17.1 |
| 1408 GT_005932_B-6            | Roe and Madin, 2013  | 45.505696 | -122.684781 | 64.1  | 10.4 |
| 1409 GT_005932_B-2            | Roe and Madin, 2013  | 45.505644 | -122.684998 | 71.5  | 1.6  |
| 1410 GT_005932_B-1            | Roe and Madin, 2013  | 45.505517 | -122.684898 | 66.8  | 2.8  |
| 1411 GT_005932_B-3            | Roe and Madin, 2013  | 45.505695 | -122.684481 | 61.1  | 22.7 |
| 1412 GT_005932_B-4            | Roe and Madin, 2013  | 45.505552 | -122.684486 | 61.8  | 15.7 |
| 1413 MTL-10879-10885_B-4      | Roe and Madin, 2013  | 45.505083 | -122.685116 | 91.8  | 1.2  |
| 1414 GT_005932_B-9            | Roe and Madin, 2013  | 45.505308 | -122.68463  | 62.5  | 1.8  |
| 1415 GT_005932_B-5            | Roe and Madin, 2013  | 45.50528  | -122.684568 | 62.5  | 4.2  |
| 1416 MTL-10879-10885_B-1      | Roe and Madin, 2013  | 45.504186 | -122.685924 | 92.2  | 0.0  |
| 1417 GT_004242_B-6            | Roe and Madin, 2013  | 45.503157 | -122.682739 | 55.8  | 6.8  |
| 1418 GT_000090_B-2            | Roe and Madin, 2013  | 45.496193 | -122.66996  | 11.3  | 28.7 |
| 1419 GT_000090_B-4            | Roe and Madin, 2013  | 45.496156 | -122.670385 | 11.6  | 22.9 |
| 1420 GT_000090_B-3            | Roe and Madin, 2013  | 45.495831 | -122.670075 | 11.4  | 27.9 |
| 1421 GT_000090_B-1            | Roe and Madin, 2013  | 45.495834 | -122.670563 | 11.8  | 28.0 |
|                               |                      |           |             |       |      |
| 1422 MTL-9965-10039-B_BH-59   | Roe and Madin, 2013  | 45.4955   | -122.670943 | 12.0  | 12.9 |
| 1423 GT_003846_B-3            | Roe and Madin, 2013  | 45.494798 | -122.671414 | 12.3  | 17.5 |
|                               |                      |           |             |       |      |
| 1424 GT_006115_B-2 (Feb 2006) | Roe and Madin, 2013  | 45.494301 | -122.670368 | 11.2  | 11.8 |
| 1425 GT_006849_B-2            | Roe and Madin, 2013  | 45.493624 | -122.671105 | 11.5  | 17.6 |
| 1426 MTL-9965-10039-B_BH-7    | Roe and Madin, 2013  | 45.493707 | -122.672075 | 12.7  | 14.8 |
|                               |                      |           |             |       |      |
| 1427 MTL-9965-10039-B_BH-42   | Roe and Madin, 2013  | 45.49258  | -122.672083 | 12.5  | 11.9 |



|      |                                      |                      |           |             |      |       |
|------|--------------------------------------|----------------------|-----------|-------------|------|-------|
| 1428 | MTL-9965-10039-B_BH-41               | Roe and Madin, 2013  | 45.492119 | -122.672124 | 12.4 | 6.9   |
| 1429 | MTL-9965-10039-B_BH-40               | Roe and Madin, 2013  | 45.49173  | -122.672163 | 12.6 | 7.4   |
| 1430 | MTL-9965-10039-B_BH-39               | Roe and Madin, 2013  | 45.490853 | -122.672305 | 12.2 | 6.1   |
| 1431 | GT_003987_B-13                       | Roe and Madin, 2013  | 45.490832 | -122.67138  | 3.8  | 0.0   |
| 1432 | MTL-9965-10039-B_BH-38               | Roe and Madin, 2013  | 45.490234 | -122.67245  | 12.3 | 5.9   |
| 1433 | MTL-010-030_028                      | Roe and Madin, 2013  | 45.490394 | -122.673473 | 21.9 | 4.2   |
| 1434 | MTL-9965-10039-B_BH-37               | Roe and Madin, 2013  | 45.489858 | -122.672569 | 12.2 | 2.2   |
| 1435 | Port 22_G-4                          | Roe and Madin, 2013  | 45.489716 | -122.67273  | 14.0 | 3.0   |
| 1436 | Port 22_B-16                         | Roe and Madin, 2013  | 45.489772 | -122.673005 | 16.3 | 3.5   |
| 1437 | Port 22_G-5                          | Roe and Madin, 2013  | 45.48971  | -122.673034 | 16.2 | 3.7   |
| 1438 | Port 22_B-15                         | Roe and Madin, 2013  | 45.489699 | -122.672998 | 16.2 | 3.7   |
| 1439 | Port 22_B-14                         | Roe and Madin, 2013  | 45.489509 | -122.673002 | 16.2 | 3.4   |
| 1440 | Port 22_B-13                         | Roe and Madin, 2013  | 45.489416 | -122.6731   | 16.2 | 3.4   |
| 1441 | Port 22_G-2                          | Roe and Madin, 2013  | 45.48937  | -122.67321  | 16.4 | 3.3   |
| 1442 | Port 22_B-18                         | Roe and Madin, 2013  | 45.489226 | -122.672995 | 14.7 | 2.2   |
| 1443 | Port 22_B-3                          | Roe and Madin, 2013  | 45.489191 | -122.672927 | 13.7 | 3.0   |
| 1444 | Port 22_G-3                          | Roe and Madin, 2013  | 45.489275 | -122.672769 | 11.7 | 2.8   |
| 1445 | Port 22_B-11                         | Roe and Madin, 2013  | 45.489007 | -122.673161 | 15.7 | 2.9   |
| 1446 | Port 22_G-1                          | Roe and Madin, 2013  | 45.48904  | -122.672851 | 12.9 | 3.5   |
| 1447 | MTL-9965-10039-B_BH-36               | Roe and Madin, 2013  | 45.489296 | -122.672503 | 11.5 | 4.5   |
| 1448 | MTL-9965-10039-B_BH-35               | Roe and Madin, 2013  | 45.488719 | -122.672634 | 12.0 | 6.5   |
| 1449 | MTL-010-030_029                      | Roe and Madin, 2013  | 45.4894   | -122.673966 | 22.1 | 1.4   |
| 1450 | MTL-5032-5037                        | Roe and Madin, 2013  | 45.486198 | -122.672548 | 10.6 | 12.7  |
| 1451 | MTL-5032-5037_B-3                    | Roe and Madin, 2013  | 45.48682  | -122.673707 | 13.9 | 12.4  |
| 1452 | MTL-9965-10039-B_BH-84               | Roe and Madin, 2013  | 45.487252 | -122.673359 | 12.7 | 10.5  |
| 1453 | MTL-5032-5037_B-2                    | Roe and Madin, 2013  | 45.487444 | -122.673698 | 13.8 | 12.3  |
| 1454 | MTL-5032-5037_B-1                    | Roe and Madin, 2013  | 45.487295 | -122.674914 | 16.4 | 6.3   |
| 1455 | MTL-010-030_030                      | Roe and Madin, 2013  | 45.488071 | -122.675201 | 21.3 | 4.8   |
| 1456 | MTL-9965-10039-B_BH-19               | Roe and Madin, 2013  | 45.479449 | -122.673809 | 15.4 | 11.8  |
| 1457 | MTL-9965-10039-B_BH-52               | Roe and Madin, 2013  | 45.478989 | -122.673788 | 15.4 | 9.6   |
| 1458 | GT_000884_B-5                        | Roe and Madin, 2013  | 45.475405 | -122.67153  | 13.1 | 9.2   |
| 1459 | GT_000247_B-4                        | Roe and Madin, 2013  | 45.476433 | -122.677318 | 38.9 | 0.0   |
| 1460 | Top CRBG elevation<br>interpretation | Swanson et al., 1993 | 45.468296 | -122.663028 | 12.2 | 33.6  |
| 1461 | Top CRBG elevation<br>interpretation | Swanson et al., 1993 | 45.452315 | -122.621544 | 53.0 | 116.4 |
| 1462 | ODOT 203-09669a<br>(47845)_TB-526    | Roe and Madin, 2013  | 45.451959 | -122.641329 | 10.9 | 14.5  |
| 1463 | ODOT 203-09669a<br>(47845)_TB-527    | Roe and Madin, 2013  | 45.45143  | -122.641388 | 10.8 | 15.1  |
| 1464 | ODOT 203-09669a<br>(47845)_TB-529    | Roe and Madin, 2013  | 45.450775 | -122.641598 | 10.7 | 9.4   |
| 1465 | ODOT 203-09669a<br>(47845)_TB-528    | Roe and Madin, 2013  | 45.450467 | -122.641645 | 10.7 | 9.2   |

|                              |                      |           |             |       |      |
|------------------------------|----------------------|-----------|-------------|-------|------|
| ODOT 203-09669a              |                      |           |             |       |      |
| 1466 (47845)_TB-521          | Roe and Madin, 2013  | 45.450055 | -122.641604 | 10.8  | 19.0 |
| ODOT 203-09669a              |                      |           |             |       |      |
| 1467 (47845)_TB-522          | Roe and Madin, 2013  | 45.449682 | -122.641408 | 11.1  | 11.4 |
| ODOT 203-09669a              |                      |           |             |       |      |
| 1468 (47845)_TB-523          | Roe and Madin, 2013  | 45.449428 | -122.641255 | 11.1  | 8.9  |
| ODOT 203-09669a              |                      |           |             |       |      |
| 1469 (47845)_TB-524          | Roe and Madin, 2013  | 45.449152 | -122.640801 | 10.8  | 3.2  |
| ODOT 203-09669a              |                      |           |             |       |      |
| 1470 (47845)_TB-525          | Roe and Madin, 2013  | 45.448934 | -122.640663 | 10.5  | 4.1  |
| ODOT 202-09668               |                      |           |             |       |      |
| 1471 (23171)_Test hole #4mo. | Roe and Madin, 2013  | 45.449131 | -122.642824 | 5.8   | 12.6 |
| 1472 GT_003109_B-3           | Roe and Madin, 2013  | 45.460791 | -122.660175 | 11.0  | 7.4  |
| Top CRBG elevation           |                      |           |             |       |      |
| 1473 interpretation          | Swanson et al., 1993 | 45.476013 | -122.689419 | 169.5 | 0.9  |
| 1474 MTL-11924-11925_B-4     | Roe and Madin, 2013  | 45.479489 | -122.686917 | 130.2 | 7.0  |
| 1475 MTL-11924-11925_B-2     | Roe and Madin, 2013  | 45.479773 | -122.687485 | 132.1 | 10.2 |
| 1476 MTL-11924-11925_B-3     | Roe and Madin, 2013  | 45.479629 | -122.68771  | 134.3 | 9.3  |
| 1477 MTL-11924-11925_B-1     | Roe and Madin, 2013  | 45.479794 | -122.687897 | 131.1 | 7.9  |
| ODOT 24-01740                |                      |           |             |       |      |
| 1478 (22873)_Test Hole #2 LY | Roe and Madin, 2013  | 45.651366 | -122.851406 | 8.4   | 5.7  |
| ODOT 24-01740                |                      |           |             |       |      |
| 1479 (22873)_Test Hole #1 LY | Roe and Madin, 2013  | 45.651246 | -122.851171 | 8.7   | 12.0 |
| 1480 GT_004227               | Roe and Madin, 2013  | 45.50169  | -122.68466  | 154.5 | 11.8 |
| 1481 GT_004227_B-15          | Roe and Madin, 2013  | 45.50152  | -122.684603 | 153.0 | 8.3  |
| 1482 MTL-11441-11450_B-3     | Roe and Madin, 2013  | 45.500556 | -122.683814 | 139.8 | 11.7 |
| 1483 MTL-11441-11450_B-2     | Roe and Madin, 2013  | 45.500338 | -122.683899 | 139.6 | 13.5 |
| 1484 MTL-11441-11450_B-10    | Roe and Madin, 2013  | 45.500328 | -122.683306 | 127.0 | 8.7  |
| 1485 MTL-11441-11450_B-9     | Roe and Madin, 2013  | 45.500127 | -122.68359  | 140.4 | 9.3  |
| 1486 MTL-11441-11450_B-8     | Roe and Madin, 2013  | 45.500024 | -122.683966 | 139.7 | 9.5  |
| 1487 MTL-11441-11450_B-7     | Roe and Madin, 2013  | 45.499723 | -122.684162 | 138.1 | 15.9 |
| 1488 MTL-11441-11450_B-1     | Roe and Madin, 2013  | 45.499801 | -122.684838 | 152.4 | 19.2 |
| 1489 GT_004237_B-1           | Roe and Madin, 2013  | 45.499756 | -122.684921 | 149.6 | 7.3  |
| 1490 MTL-11441-11450_B-4     | Roe and Madin, 2013  | 45.499577 | -122.684672 | 140.1 | 6.3  |
| 1491 MTL-11441-11450_B-6     | Roe and Madin, 2013  | 45.499378 | -122.684278 | 122.0 | 8.6  |
| 1492 GT_006567_B-2           | Roe and Madin, 2013  | 45.499201 | -122.685121 | 137.2 | 0.0  |
| 1493 GT_006567_B-3           | Roe and Madin, 2013  | 45.499098 | -122.684643 | 125.8 | 9.3  |
| 1494 MTL-11441-11450_B-5     | Roe and Madin, 2013  | 45.499121 | -122.684834 | 133.6 | 8.0  |
| 1495 GT_006567_B-1           | Roe and Madin, 2013  | 45.49899  | -122.684901 | 130.6 | 5.0  |
| 1496 GT_006567_AT-2          | Roe and Madin, 2013  | 45.498947 | -122.685233 | 133.1 | 6.3  |
| 1497 GT_006567_AT-3          | Roe and Madin, 2013  | 45.498852 | -122.685103 | 132.3 | 13.2 |
| 1498 GT_001420               | Roe and Madin, 2013  | 45.500695 | -122.686191 | 163.3 | 8.8  |
| 1499 GT_001420_B-5           | Roe and Madin, 2013  | 45.500488 | -122.686163 | 164.3 | 8.2  |
| 1500 GT_001420_B-3           | Roe and Madin, 2013  | 45.500438 | -122.686428 | 166.9 | 9.0  |
| 1501 GT_001420_B-2           | Roe and Madin, 2013  | 45.500185 | -122.686321 | 170.2 | 10.2 |
| 1502 GT_001420_B-1           | Roe and Madin, 2013  | 45.500257 | -122.686655 | 171.3 | 11.9 |
| 1503 GT_006572_BORING 6      | Roe and Madin, 2013  | 45.500743 | -122.687411 | 167.3 | 14.3 |
| 1504 GT_006572_BORING 5      | Roe and Madin, 2013  | 45.500511 | -122.687504 | 172.2 | 13.7 |
| 1505 GT_004243_B-5           | Roe and Madin, 2013  | 45.500847 | -122.687938 | 159.0 | 9.4  |
| 1506 GT_004243_B-2           | Roe and Madin, 2013  | 45.500731 | -122.688255 | 154.4 | 5.0  |
| 1507 GT_004243_B-4           | Roe and Madin, 2013  | 45.500554 | -122.6882   | 165.1 | 3.0  |
| 1508 GT_004243_B-3           | Roe and Madin, 2013  | 45.500593 | -122.688478 | 155.7 | 9.4  |

|      |                           |                                              |           |             |       |       |
|------|---------------------------|----------------------------------------------|-----------|-------------|-------|-------|
| 1509 | GT_006568_B-2             | Roe and Madin, 2013                          | 45.500469 | -122.688534 | 162.7 | 13.9  |
| 1510 | GT_006568_B-5             | Roe and Madin, 2013                          | 45.500576 | -122.688888 | 146.6 | 7.9   |
| 1511 | GT_006568_B-3             | Roe and Madin, 2013                          | 45.500345 | -122.688678 | 164.0 | 8.3   |
| 1512 | GT_006568_B-4             | Roe and Madin, 2013                          | 45.500226 | -122.688709 | 173.2 | 13.5  |
| 1513 | GT_006568_B-6             | Roe and Madin, 2013                          | 45.500388 | -122.689026 | 152.7 | 7.9   |
| 1514 | GT_006756_B-1             | Roe and Madin, 2013                          | 45.501075 | -122.690028 | 163.6 | 3.9   |
| 1515 | GT_006568_B-1             | Roe and Madin, 2013                          | 45.500169 | -122.688189 | 173.7 | 10.6  |
| 1516 | GT_003164_B-4             | Roe and Madin, 2013                          | 45.499926 | -122.68844  | 174.4 | 14.4  |
| 1517 | GT_003164_B-3             | Roe and Madin, 2013                          | 45.499728 | -122.688604 | 174.3 | 14.0  |
| 1518 | GT_003164_B-2             | Roe and Madin, 2013                          | 45.499528 | -122.688539 | 175.1 | 11.1  |
| 1519 | GT_006573_B-3             | Roe and Madin, 2013                          | 45.499036 | -122.686155 | 148.6 | 5.7   |
| 1520 | GT_006573_B-7             | Roe and Madin, 2013                          | 45.498789 | -122.686102 | 135.3 | 6.6   |
| 1521 | GT_006573_B-9             | Roe and Madin, 2013                          | 45.498704 | -122.686291 | 133.8 | 7.3   |
| 1522 | GT_006573_B-6             | Roe and Madin, 2013                          | 45.498877 | -122.686415 | 140.5 | 10.3  |
| 1523 | GT_006573_B-2             | Roe and Madin, 2013                          | 45.499008 | -122.686465 | 146.6 | 6.7   |
| 1524 | GT_006573_B-5             | Roe and Madin, 2013                          | 45.498808 | -122.686473 | 138.9 | 12.4  |
| 1525 | GT_006573_B-1             | Roe and Madin, 2013                          | 45.498893 | -122.686664 | 141.7 | 7.0   |
| 1526 | GT_006573_B-8             | Roe and Madin, 2013                          | 45.498721 | -122.686531 | 137.5 | 12.6  |
| 1527 | GT_006573_B-4             | Roe and Madin, 2013                          | 45.498761 | -122.686649 | 142.0 | 9.7   |
| 1528 | GT_000361_B-3             | Roe and Madin, 2013                          | 45.499012 | -122.687424 | 156.5 | 8.7   |
| 1529 | GT_000361_B-4             | Roe and Madin, 2013                          | 45.49875  | -122.687448 | 147.8 | 12.8  |
| 1530 | GT_000361_B-2             | Roe and Madin, 2013                          | 45.498876 | -122.688002 | 162.8 | 16.8  |
| 1531 | GT_000361_B-1             | Roe and Madin, 2013                          | 45.498731 | -122.687974 | 155.4 | 12.8  |
| 1532 | GT_000362_B-6             | Roe and Madin, 2013                          | 45.49833  | -122.688161 | 142.4 | 1.6   |
| 1533 | GT_000362_B-10            | Roe and Madin, 2013                          | 45.498059 | -122.688016 | 137.2 | 4.6   |
| 1534 | GT_000362_B-7             | Roe and Madin, 2013                          | 45.498338 | -122.688615 | 150.9 | 4.5   |
| 1535 | GT_000362_B-3             | Roe and Madin, 2013                          | 45.498319 | -122.689083 | 156.8 | 10.5  |
| 1536 | GT_000362_B-2             | Roe and Madin, 2013                          | 45.498328 | -122.68937  | 161.1 | 12.3  |
| 1537 | GT_000362_B-8             | Roe and Madin, 2013                          | 45.498112 | -122.688889 | 156.6 | 7.6   |
| 1538 | GT_000362_B-1             | Roe and Madin, 2013                          | 45.498088 | -122.688422 | 149.8 | 5.3   |
| 1539 | GT_000362_B-9             | Roe and Madin, 2013                          | 45.497822 | -122.688628 | 154.0 | 7.4   |
| 1540 | GT_000362_B-5             | Roe and Madin, 2013                          | 45.497686 | -122.688516 | 160.1 | 9.2   |
| 1541 | GT_000362_B-4             | Roe and Madin, 2013                          | 45.497731 | -122.688362 | 154.7 | 11.2  |
| 1542 | GT_004228_B-3             | Roe and Madin, 2013                          | 45.497692 | -122.687343 | 148.0 | 8.4   |
| 1543 | GT_004228_B-1             | Roe and Madin, 2013                          | 45.496944 | -122.685608 | 167.7 | 21.7  |
| 1544 | GT_004228_B-7             | Roe and Madin, 2013                          | 45.497386 | -122.685776 | 152.1 | 6.5   |
| 1545 | GT_004228_B-9             | Roe and Madin, 2013                          | 45.497229 | -122.686202 | 159.2 | 10.8  |
| 1546 | GT_004228_B-2             | Roe and Madin, 2013                          | 45.497212 | -122.68656  | 166.2 | 18.7  |
| 1547 | GT_004228_B-4             | Roe and Madin, 2013                          | 45.497729 | -122.686911 | 142.0 | 5.7   |
| 1548 | GT_004228_B-5             | Roe and Madin, 2013                          | 45.497869 | -122.686333 | 132.7 | 3.4   |
| 1549 | GT_004228_B-6             | Roe and Madin, 2013                          | 45.497434 | -122.686378 | 154.5 | 4.3   |
| 1550 | GT_004228_B-8             | Roe and Madin, 2013                          | 45.497923 | -122.68569  | 124.1 | 4.6   |
| 1551 | N. Clackamas Park seismic | Liberty et al., 2003                         | 45.424287 | -122.613455 | 15.7  | 15.1  |
| 1552 | N. Clackamas Park seismic | Liberty et al 2003;<br>seismic line 1 at NCP | 45.424583 | -122.612673 | 15.8  | 20.1  |
| 1553 | N. Clackamas Park seismic | Liberty et al 2003;<br>seismic line 1 at NCP | 45.424932 | -122.611748 | 17.3  | 50.2  |
| 1554 | N. Clackamas Park seismic | Liberty et al 2003;<br>seismic line 1 at NCP | 45.425335 | -122.61068  | 19.2  | 110.1 |

|                                |                                              |           |             |       |       |       |
|--------------------------------|----------------------------------------------|-----------|-------------|-------|-------|-------|
| 1555 N. Clackamas Park seismic | Liberty et al 2003;<br>seismic line 1 at NCP | 45.426202 | -122.608384 | 19.1  | 180.0 |       |
| 1556 N. Clackamas Park seismic | Liberty et al 2003;<br>seismic line 1 at NCP | 45.426672 | -122.60714  | 19.4  | 180.0 | 271.6 |
| 1557 N. Clackamas Park seismic | Liberty et al 2003;<br>seismic line 1 at NCP | 45.427071 | -122.606082 | 19.7  | 169.9 |       |
| 1558 N. Clackamas Park seismic | Liberty et al 2003;<br>seismic line 1 at NCP | 45.427666 | -122.602406 | 23.2  | 165.3 |       |
| 1559 N. Clackamas Park seismic | Liberty et al 2003;<br>seismic line 1 at NCP | 45.427489 | -122.603629 | 21.2  | 170.0 |       |
| 1560 N. Clackamas Park seismic | Liberty et al 2003;<br>seismic line 1 at NCP | 45.427305 | -122.604899 | 20.6  | 175.1 | 236.2 |
| 1561 MTL-9510-9546_B-3         | Roe and Madin, 2013                          | 45.489371 | -122.680428 | 56.1  | 6.7   |       |
| 1562 MTL-9510-9546_B-5         | Roe and Madin, 2013                          | 45.489521 | -122.679395 | 72.6  | 24.1  |       |
| 1563 MTL-9510-9546_B-28        | Roe and Madin, 2013                          | 45.489276 | -122.680078 | 54.6  | 4.6   |       |
| 1564 MTL-9510-9546_B-26        | Roe and Madin, 2013                          | 45.489177 | -122.679706 | 54.5  | 4.2   |       |
| 1565 MTL-9510-9546_B-4         | Roe and Madin, 2013                          | 45.489169 | -122.679383 | 54.5  | 4.2   |       |
| 1566 MTL-9510-9546_B-29        | Roe and Madin, 2013                          | 45.489186 | -122.678794 | 53.3  | 2.7   |       |
| 1567 MTL-9510-9546_B-11        | Roe and Madin, 2013                          | 45.48822  | -122.676991 | 45.5  | 19.9  |       |
| 1568 MTL-9965-10039-B_BH-32    | Roe and Madin, 2013                          | 45.487743 | -122.673857 | 14.4  | 8.0   |       |
| 1569 GT_003987_B-8             | Roe and Madin, 2013                          | 45.491316 | -122.670472 | 3.2   | 12.0  | 103.6 |
| ODOT 10-01137b                 |                                              |           |             |       |       |       |
| 1570 (46847)_TB-502            | Roe and Madin, 2013                          | 45.446844 | -122.643295 | 8.4   | 4.4   |       |
| ODOT 10-01137b                 |                                              |           |             |       |       |       |
| 1571 (46847)_TB-501            | Roe and Madin, 2013                          | 45.446249 | -122.643198 | 11.7  | 4.0   |       |
| Final Data Report - Segment    |                                              |           |             |       |       |       |
| 1572 D_BD-95                   | Roe and Madin, 2013                          | 45.446414 | -122.637662 | 16.7  | 4.5   |       |
| 1573 MTL-8705-8706_TB-101      | Roe and Madin, 2013                          | 45.451247 | -122.63631  | 17.7  | 18.0  |       |
| 1574 MTL-8705-8706_TB-102      | Roe and Madin, 2013                          | 45.450412 | -122.637216 | 16.3  | 6.2   |       |
| Final Data Report - Segment    |                                              |           |             |       |       |       |
| 1575 D_BD-120                  | Roe and Madin, 2013                          | 45.4302   | -122.636844 | 44.0  | 7.4   |       |
| Final Data Report - Segment    |                                              |           |             |       |       |       |
| 1576 D_BD-123                  | Roe and Madin, 2013                          | 45.43006  | -122.634301 | 44.2  | 5.8   |       |
| Final Data Report - Segment    |                                              |           |             |       |       |       |
| 1577 D_BD-124                  | Roe and Madin, 2013                          | 45.429539 | -122.635335 | 42.7  | 4.0   |       |
| Final Data Report - Segment    |                                              |           |             |       |       |       |
| 1578 D_BD-122                  | Roe and Madin, 2013                          | 45.430018 | -122.632687 | 56.2  | 3.5   |       |
| 1579 GT_001097_B-2             | Roe and Madin, 2013                          | 45.440285 | -122.656704 | 87.6  | 3.1   |       |
| 1580 GT_001097_B-1             | Roe and Madin, 2013                          | 45.440144 | -122.656615 | 86.3  | 1.6   |       |
| 1581 GT_006932_B-2             | Roe and Madin, 2013                          | 45.50958  | -122.689626 | 133.1 | 7.8   |       |
| 1582 GT_006932_B-1             | Roe and Madin, 2013                          | 45.509489 | -122.689594 | 133.1 | 7.8   |       |
| 1583 MTL-11461-11467_B-5       | Roe and Madin, 2013                          | 45.505322 | -122.694256 | 165.9 | 8.9   |       |
| 1584 GT_000181_GI-4            | Roe and Madin, 2013                          | 45.521392 | -122.704236 | 101.8 | 23.4  |       |
| 1585 GT_000181_GI-1            | Roe and Madin, 2013                          | 45.521687 | -122.704944 | 113.1 | 21.4  |       |
| 1586 GT_000181_GI-2            | Roe and Madin, 2013                          | 45.521481 | -122.705099 | 114.4 | 19.9  |       |
| 1587 GT_000181_GI-3            | Roe and Madin, 2013                          | 45.521344 | -122.704919 | 112.4 | 10.3  |       |
| 1588 MTL-2112-2178_B-579       | Roe and Madin, 2013                          | 45.518954 | -122.700001 | 63.0  | 5.7   |       |
| 1589 MTL-2112-2178_B-521       | Roe and Madin, 2013                          | 45.518331 | -122.701139 | 61.7  | 15.1  |       |
| 1590 MTL-2112-2178_B-582I      | Roe and Madin, 2013                          | 45.517995 | -122.70102  | 71.9  | 12.7  |       |
| 1591 MTL-2112-2178_B-547       | Roe and Madin, 2013                          | 45.517947 | -122.700715 | 72.5  | 18.8  |       |
| 1592 MTL-2112-2178_B-581I      | Roe and Madin, 2013                          | 45.51784  | -122.700955 | 75.6  | 13.1  |       |
| 1593 MTL-2112-2178_B-575       | Roe and Madin, 2013                          | 45.517805 | -122.700858 | 80.3  | 13.3  |       |

|      |                           |                      |           |             |       |       |       |
|------|---------------------------|----------------------|-----------|-------------|-------|-------|-------|
| 1594 | MTL-2112-2178_B-523       | Roe and Madin, 2013  | 45.517713 | -122.701204 | 81.4  | 16.5  |       |
| 1595 | MTL-2112-2178_B-546       | Roe and Madin, 2013  | 45.517674 | -122.700909 | 82.8  | 12.7  |       |
| 1596 | MTL-2112-2178_B-580I      | Roe and Madin, 2013  | 45.517633 | -122.700246 | 89.4  | 14.7  |       |
| 1597 | MTL-2112-2178_B-574       | Roe and Madin, 2013  | 45.516868 | -122.701169 | 108.5 | 23.8  |       |
| 1598 | MTL-2112-2178_B-578       | Roe and Madin, 2013  | 45.519081 | -122.69873  | 51.2  | 4.5   |       |
| 1599 | MTL-2112-2178_B-549       | Roe and Madin, 2013  | 45.518525 | -122.700435 | 66.5  | 1.2   |       |
| 1600 | MTL-2112-2178_B-577       | Roe and Madin, 2013  | 45.518327 | -122.700621 | 61.3  | 3.4   |       |
| 1601 | MTL-2112-2178_B-576       | Roe and Madin, 2013  | 45.518253 | -122.700666 | 63.8  | 7.2   |       |
| 1602 | MTL-2112-2178_B-522       | Roe and Madin, 2013  | 45.518131 | -122.700713 | 64.9  | 2.4   |       |
| 1603 | MTL-2186-2206_B-4         | Roe and Madin, 2013  | 45.522891 | -122.711016 | 129.0 | 2.5   |       |
| 1604 | MTL-2186-2206_B-3         | Roe and Madin, 2013  | 45.522642 | -122.712675 | 140.3 | 3.7   |       |
| 1605 | MTL-2186-2206_B-2         | Roe and Madin, 2013  | 45.522551 | -122.714691 | 152.7 | 3.0   |       |
| 1606 | MTL-2186-2206_B-1         | Roe and Madin, 2013  | 45.52208  | -122.716253 | 164.2 | 2.7   |       |
| 1607 | MTL-11461-11467_B-6       | Roe and Madin, 2013  | 45.50546  | -122.69429  | 166.9 | 3.2   |       |
| 1608 | MTL-11461-11467_B-7       | Roe and Madin, 2013  | 45.505394 | -122.694351 | 165.0 | 2.3   |       |
| 1609 | MTL-2112-2178_B-524       | Roe and Madin, 2013  | 45.515427 | -122.701773 | 112.4 | 14.0  |       |
| 1610 | GT_000897_GB-2            | Roe and Madin, 2013  | 45.594078 | -122.778486 | 10.1  | 22.3  |       |
| 1611 | MTL-8744-8748_B-3         | Roe and Madin, 2013  | 45.598249 | -122.787185 | 54.2  | 5.4   |       |
| 1612 | O-95-07_LOD6              | Roe and Madin, 2013  | 45.417595 | -122.632827 | 65.6  | 37.0  |       |
| 1613 | interpretation            | Swanson et al., 1993 | 45.477501 | -122.289728 | 42.8  | 105.3 | 440.4 |
| 1614 | MULT_4852                 | OWRD                 | 45.517887 | -122.671945 | 10.9  | 90.4  |       |
| 1615 | MULT_1056                 | OWRD                 | 45.520394 | -122.67704  | 11.9  | 118.8 | 362.7 |
| 1616 | MULT_1073                 | OWRD                 | 45.520114 | -122.677596 | 12.5  | 41.8  |       |
| 1617 | MULT_991                  | OWRD                 | 45.560361 | -122.735916 | 11.5  | 21.3  |       |
| 1618 | MULT_989                  | OWRD                 | 45.568575 | -122.743297 | 11.2  | 22.8  |       |
| 1619 | MULT_114498               | OWRD                 | 45.574563 | -122.75755  | 12.9  | 17.2  |       |
| 1620 | MULT_801                  | OWRD                 | 45.577368 | -122.757357 | 11.5  | 23.7  |       |
| 1621 | MULT_60074                | OWRD                 | 45.466239 | -122.661488 | 28.4  | 19.2  |       |
| 1622 | MULT_1363                 | OWRD                 | 45.540119 | -122.434256 | 38.0  | 245.2 | 282.2 |
| 1623 | MULT_73257                | OWRD                 | 45.508969 | -122.343454 | 106.9 | 175.8 | 373.4 |
| 1624 | CLAC_66361                | OWRD                 | 45.4304   | -122.243176 | 188.1 | 128.0 | 463.3 |
| 1625 | CLAC_4679                 | OWRD                 | 45.417145 | -122.438152 | 175.7 | 185.7 | 520.9 |
| 1626 | CLAC_12303                | OWRD                 | 45.394903 | -122.411825 | 71.0  | 179.8 | 515.1 |
| 1627 | CLAC_2455                 | OWRD                 | 45.426356 | -122.635898 | 62.1  | 26.5  |       |
| 1628 | CRBG surface exposure     | Wells et al., 2020a  | 45.735712 | -122.996844 | 414.5 | 0.0   |       |
| 1629 | CRBG surface exposure     | Wells et al., 2020a  | 45.737362 | -122.999314 | 426.4 | 0.0   |       |
| 1630 | CRBG surface exposure     | Wells et al., 2020a  | 45.740971 | -123.005526 | 448.4 | 0.0   |       |
| 1631 | CRBG surface exposure     | Wells et al., 2020a  | 45.746137 | -123.008058 | 458.4 | 0.0   |       |
| 1632 | CRBG surface exposure     | Wells et al., 2020a  | 45.760283 | -123.022182 | 501.3 | 0.0   |       |
| 1633 | CRBG surface exposure     | Wells et al., 2020a  | 45.768954 | -123.025828 | 513.7 | 0.0   |       |
| 1634 | CRBG surface exposure     | Wells et al., 2020a  | 45.773227 | -123.012842 | 503.2 | 0.0   |       |
| 1635 | Pre-CRBG surface exposure | Wells et al., 2020a  | 45.860452 | -122.68765  | 4.6   | 0.0   |       |
| 1636 | Pre-CRBG surface exposure | Wells et al., 2020a  | 45.867392 | -122.699466 | 16.9  | 0.0   |       |
| 1637 | Pre-CRBG surface exposure | Wells et al., 2020a  | 45.864609 | -122.698633 | 18.7  | 0.0   |       |
| 1638 | Pre-CRBG surface exposure | Wells et al., 2020a  | 45.868998 | -122.707597 | 39.4  | 0.0   |       |

|                              |                     |           |             |       |       |       |
|------------------------------|---------------------|-----------|-------------|-------|-------|-------|
| Pre-CRBG surface             |                     |           |             |       |       |       |
| 1639 exposure                | Wells et al., 2020a | 45.870978 | -122.707793 | 8.3   | 0.0   |       |
| Pre-CRBG surface             |                     |           |             |       |       |       |
| 1640 exposure                | Wells et al., 2020a | 45.871888 | -122.706272 | 5.1   | 0.0   |       |
| Pre-CRBG surface             |                     |           |             |       |       |       |
| 1641 exposure                | Wells et al., 2020a | 45.86785  | -122.696037 | 6.9   | 0.0   |       |
| Pre-CRBG surface             |                     |           |             |       |       |       |
| 1642 exposure                | Wells et al., 2020a | 45.876934 | -122.71416  | 36.3  | 0.0   |       |
| Pre-CRBG surface             |                     |           |             |       |       |       |
| 1643 exposure                | Wells et al., 2020a | 45.881482 | -122.718521 | 77.2  | 0.0   |       |
| Pre-CRBG surface             |                     |           |             |       |       |       |
| 1644 exposure                | Wells et al., 2020a | 45.878149 | -122.711943 | 76.4  | 0.0   |       |
| Pre-CRBG surface             |                     |           |             |       |       |       |
| 1645 exposure                | Wells et al., 2020a | 45.874113 | -122.70261  | 64.4  | 0.0   |       |
| Pre-CRBG surface             |                     |           |             |       |       |       |
| 1646 exposure                | Wells et al., 2020a | 45.891731 | -122.728714 | 68.6  | 0.0   |       |
| Pre-CRBG surface             |                     |           |             |       |       |       |
| 1647 exposure                | Wells et al., 2020a | 45.895995 | -122.73178  | 3.9   | 0.0   |       |
| Pre-CRBG surface             |                     |           |             |       |       |       |
| 1648 exposure                | Wells et al., 2020a | 45.89403  | -122.726217 | 101.6 | 0.0   |       |
| Pre-CRBG surface             |                     |           |             |       |       |       |
| 1649 exposure                | Wells et al., 2020a | 45.897456 | -122.731081 | 28.7  | 0.0   |       |
| Pre-CRBG surface             |                     |           |             |       |       |       |
| 1650 exposure                | Wells et al., 2020a | 45.898497 | -122.716613 | 138.5 | 0.0   |       |
| Pre-CRBG surface             |                     |           |             |       |       |       |
| 1651 exposure                | Wells et al., 2020a | 45.900426 | -122.730724 | 39.3  | 0.0   |       |
| Base CRBG surface            |                     |           |             |       |       |       |
| 1652 exposure                | Wells et al., 2020a | 45.8704   | -122.700123 | 31.8  | 0.0   |       |
| Pre-CRBG surface             |                     |           |             |       |       |       |
| 1653 exposure                | Wells et al., 2020a | 45.447129 | -122.655787 | 2.9   | 0.0   |       |
| Pre-CRBG surface             |                     |           |             |       |       |       |
| 1654 exposure                | Wells et al., 2020a | 45.425477 | -122.698555 | 130.0 | 0.0   |       |
| Pre-CRBG surface             |                     |           |             |       |       |       |
| 1655 exposure                | Wells et al., 2020a | 45.438889 | -122.681877 | 66.8  | 0.0   |       |
| Pre-CRBG surface             |                     |           |             |       |       |       |
| 1656 exposure                | Wells et al., 2020a | 45.429678 | -122.666749 | 64.9  | 0.0   |       |
| Pre-CRBG surface             |                     |           |             |       |       |       |
| 1657 exposure                | Wells et al., 2020a | 45.436263 | -122.645811 | 2.9   | 0.0   |       |
| Pre-CRBG surface             |                     |           |             |       |       |       |
| 1658 exposure                | Wells et al., 2020a | 45.450996 | -122.651755 | 16.2  | 0.0   |       |
| Pre-CRBG surface             |                     |           |             |       |       |       |
| 1659 exposure                | Wells et al., 2020a | 45.44297  | -122.64278  | 10.6  | 0.0   |       |
| Pre-CRBG surface             |                     |           |             |       |       |       |
| 1660 exposure                | Wells et al., 2020a | 45.453592 | -122.656708 | 3.2   | 0.0   |       |
| Pre-CRBG surface             |                     |           |             |       |       |       |
| 1661 exposure                | Wells et al., 2020a | 45.457203 | -122.658711 | 9.1   | 0.0   |       |
| 1662 Paleogene volcanic rock | Liberty, 2002       | 45.568548 | -122.453783 | 3.0   | 229.8 | 229.8 |
| 1663 Paleogene volcanic rock | Liberty, 2002       | 45.566119 | -122.4199   | 3.1   | 50.1  | 50.0  |
| 1664 WADOE ID: 1627          | WADOE               | 45.898328 | -122.714183 | 151.7 | 1.5   |       |
| 1665 MULT_2749               | OWRD                | 45.512862 | -122.684066 | 43.1  | 96.7  |       |
| 1666 CLAC_395                | OWRD                | 45.438736 | -122.557036 | 122.4 | 230.9 | 566.3 |
| 1667 tCRBG seismic line 1    | Liberty, 2002       | 45.646515 | -122.747441 | 2.8   | 402.7 | 737.9 |
| 1668 tCRBG seismic line 1    | Liberty, 2002       | 45.64124  | -122.731983 | 2.8   | 422.8 | 758.0 |
| 1669 tCRBG seismic line 1    | Liberty, 2002       | 45.63682  | -122.716116 | 2.8   | 452.7 | 787.9 |
| 1670 tCRBG seismic line 1    | Liberty, 2002       | 45.629827 | -122.700944 | 2.6   | 482.7 | 817.8 |
| 1671 tCRBG seismic line 1    | Liberty, 2002       | 45.622551 | -122.687407 | 2.7   | 502.6 | 837.9 |
| 1672 tCRBG seismic line 1    | Liberty, 2002       | 45.816348 | -122.794658 | 2.5   | 125.0 | 292.6 |

|                                            |                     |           |             |       |       |       |
|--------------------------------------------|---------------------|-----------|-------------|-------|-------|-------|
| 1673 tCRBG seismic line 1                  | Liberty, 2002       | 45.725713 | -122.763019 | 2.4   | 359.9 | 695.2 |
| 1674 tCRBG seismic line 1                  | Liberty, 2002       | 45.69361  | -122.770403 | 3.0   | 380.0 | 715.4 |
| 1675 tCRBG seismic line 2                  | Liberty, 2002       | 45.609026 | -122.64708  | 2.9   | 464.9 | 800.1 |
| 1676 tCRBG seismic line 2                  | Liberty, 2002       | 45.604234 | -122.595114 | 2.8   | 414.9 | 750.1 |
| 1677 tCRBG seismic line 2                  | Liberty, 2002       | 45.596035 | -122.551469 | 3.0   | 395.0 | 638.9 |
| 1678 WADOE ID: 1582135<br>Pre-CRBG surface | WADOE               | 45.853637 | -122.705528 | 76.2  | 64.3  |       |
| 1679 exposure<br>Pre-CRBG surface          | Wells et al., 2020a | 45.760963 | -122.992238 | 288.2 | 0.0   |       |
| 1680 exposure<br>Geologic map -200 ft      | Wells et al., 2020a | 45.754731 | -122.934268 | 98.1  | 0.0   |       |
| 1681 contour<br>Geologic map -400 ft       | Wells et al., 2020a | 45.800133 | -122.866186 | 24.1  | 85.0  | 237.4 |
| 1682 contour<br>Geologic map -600 ft       | Wells et al., 2020a | 45.773097 | -122.860391 | 14.5  | 136.5 | 289.0 |
| 1683 contour<br>Geologic map -800 ft       | Wells et al., 2020a | 45.804479 | -122.826951 | 4.9   | 187.8 | 492.6 |
| 1684 contour<br>Geologic map -1000 ft      | Wells et al., 2020a | 45.753616 | -122.83744  | 4.2   | 248.0 | 552.9 |
| 1685 contour<br>Geologic map -1000 ft      | Wells et al., 2020a | 45.701592 | -122.815863 | 3.9   | 308.6 | 461.2 |
| 1686 contour<br>Geologic map -600 ft       | Wells et al., 2020a | 45.50666  | -122.475395 | 80.8  | 385.6 | 720.9 |
| 1687 contour<br>Geologic map -800 ft       | Wells et al., 2020a | 45.475068 | -122.396115 | 140.5 | 323.4 | 658.7 |
| 1688 contour<br>Geologic map -1000 ft      | Wells et al., 2020a | 45.648185 | -122.791295 | 3.6   | 247.4 | 415.1 |
| 1689 contour<br>Geologic map -600 ft       | Wells et al., 2020a | 45.580829 | -122.691405 | 33.7  | 338.5 | 613.0 |
| 1690 contour                               | Wells et al., 2020a | 45.49067  | -122.619187 | 63.8  | 246.6 | 429.5 |
| 1691 CRBG surface exposure                 | Wells et al., 2020a | 45.392553 | -122.578654 | 45.8  | 0.0   |       |
| 1692 CRBG surface exposure                 | Wells et al., 2020a | 45.404785 | -122.591118 | 40.5  | 0.0   |       |
| 1693 CRBG surface exposure                 | Wells et al., 2020a | 45.415857 | -122.601355 | 41.2  | 0.0   |       |
| 1694 CRBG surface exposure                 | Wells et al., 2020a | 45.387309 | -122.580914 | 40.0  | 0.0   |       |
| 1695 CRBG surface exposure                 | Wells et al., 2020a | 45.382209 | -122.582074 | 22.7  | 0.0   |       |
| 1696 CRBG surface exposure                 | Wells et al., 2020a | 45.389476 | -122.597345 | 30.9  | 0.0   |       |
| 1697 CRBG surface exposure                 | Wells et al., 2020a | 45.401532 | -122.614495 | 50.4  | 0.1   |       |
| 1698 CLAC_304                              | OWRD                | 45.451564 | -122.636442 | 16.5  | 42.7  |       |
| 1699 COLU_53975                            | OWRD                | 45.72155  | -122.897337 | 107.8 | 109.6 |       |
| 1700 MULT_113080                           | OWRD                | 45.719713 | -122.887608 | 84.3  | 51.9  |       |
| 1701 COLU_53503<br>Barber # 1; ID: 36-051- | OWRD                | 45.726576 | -122.923405 | 180.5 | 56.2  |       |
| 1702 00001                                 | DOGAMI              | 45.554956 | -122.767825 | 294.3 | 0.2   | 263.3 |
| 1703 CLAC_3869                             | OWRD                | 45.358643 | -122.645533 | 177.8 | 22.0  | 164.3 |
| 1704 CLAC_3153                             | OWRD                | 45.377365 | -122.717247 | 61.8  | 148.6 | 272.8 |
| 1705 MULT_92487                            | Roe and Madin, 2013 | 45.549051 | -122.767663 | 337.5 | 24.7  | 294.4 |
| 1706 WASH_315                              | OWRD                | 45.37207  | -122.90739  | 220.6 | 7.9   | 305.1 |
| 1707 WASH_61622                            | OWRD                | 45.413733 | -122.804801 | 147.0 | 0.0   | 308.5 |
| 1708 WASH_330                              | OWRD                | 45.549716 | -122.844975 | 77.6  | 123.4 | 367.6 |
| 1709 WASH_7691                             | OWRD                | 45.613726 | -123.002101 | 67.3  | 0.0   | 177.7 |
| 1710 WASH_866                              | OWRD                | 45.603267 | -122.904943 | 139.5 | 0.0   | 163.4 |
| 1711 WASH_5586                             | OWRD                | 45.541346 | -122.933351 | 56.3  | 295.2 | 462.4 |
| 1712 WASH_54507                            | OWRD                | 45.480316 | -122.841122 | 79.5  | 25.3  | 125.9 |

|                             |                     |           |             |       |       |       |
|-----------------------------|---------------------|-----------|-------------|-------|-------|-------|
| 1713 WASH_58003             | OWRD                | 45.414166 | -122.784337 | 120.8 | 0.1   | 184.7 |
| 1714 WASH_51495             | OWRD                | 45.485764 | -122.918397 | 62.6  | 170.5 | 214.3 |
| 1715 WASH_6150              | OWRD                | 45.577747 | -123.056717 | 54.1  | 261.4 | 458.7 |
| 1716 WASH_52537             | OWRD                | 45.544815 | -123.040544 | 50.9  | 390.7 | 460.2 |
| 1717 WASH_1303              | OWRD                | 45.484766 | -123.016847 | 52.4  | 213.6 | 262.7 |
| 1718 CLAC_59817             | OWRD                | 45.332499 | -122.356571 | 114.9 | 250.9 | 467.9 |
| 1719 CLAC_18421             | OWRD                | 45.315281 | -122.547614 | 159.4 | 256.0 | 431.6 |
| 1720 CLAC_20274             | OWRD                | 45.269539 | -122.546962 | 166.8 | 384.1 | 457.2 |
| 1721 CLAC_115               | OWRD                | 45.376633 | -122.703666 | 56.1  | 99.7  | 134.1 |
| 1722 CLAC_54464             | OWRD                | 45.444388 | -122.161146 | 202.5 | 12.3  | 247.5 |
| 1723 CLAC_54800             | OWRD                | 45.446058 | -122.157576 | 210.3 | 6.1   | 178.0 |
| 1724 CLAC_56872             | OWRD                | 45.446164 | -122.157576 | 210.3 | 18.6  | 201.5 |
| 1725 CLAC_58434             | OWRD                | 45.446014 | -122.152625 | 267.3 | 36.0  | 231.6 |
| 1726 CLAC_58435             | OWRD                | 45.447092 | -122.156067 | 223.6 | 32.2  | 198.1 |
| 1727 MULT_72560             | OWRD                | 45.448687 | -122.150425 | 231.4 | 32.7  | 210.3 |
| 1728 MULT_72561             | OWRD                | 45.446795 | -122.158083 | 208.8 | 10.6  | 205.7 |
| 1729 MULT_72559             | OWRD                | 45.485758 | -122.087063 | 385.9 | 3.4   | 182.9 |
| 1730 CLAC_4488              | OWRD                | 45.317731 | -122.758761 | 71.4  | 0.1   | 268.2 |
| 1731 YAMH_1690              | OWRD                | 45.356367 | -122.993343 | 429.6 | 3.8   | 160.6 |
| 1732 WASH_61319             | OWRD                | 45.463389 | -122.814697 | 107.5 | 4.5   | 146.9 |
| 1733 WASH_58002             | OWRD                | 45.356106 | -122.788936 | 105.3 | 3.1   | 326.1 |
| 1734 WASH_55816             | OWRD                | 45.428722 | -122.846192 | 98.8  | 3.0   | 302.4 |
| Cooper Mt #1; ID: 36-067-   |                     |           |             |       |       |       |
| 1735 00001                  | DOGAMI              | 45.453776 | -122.869758 | 232.9 | 0.0   | 322.8 |
| Base CRBG surface           |                     |           |             |       |       |       |
| 1736 exposure               | Wells et al., 2020a | 45.312954 | -122.669989 | 36.1  | 36.1  |       |
| Base CRBG surface           |                     |           |             |       |       |       |
| 1737 exposure               | Wells et al., 2020a | 45.316473 | -122.669726 | 62.3  | 62.3  |       |
| Base CRBG surface           |                     |           |             |       |       |       |
| 1738 exposure               | Wells et al., 2020a | 45.320656 | -122.668643 | 73.4  | 73.4  |       |
| Base CRBG surface           |                     |           |             |       |       |       |
| 1739 exposure               | Wells et al., 2020a | 45.325365 | -122.665897 | 50.4  | 50.4  |       |
| Base CRBG surface           |                     |           |             |       |       |       |
| 1740 exposure               | Wells et al., 2020a | 45.329828 | -122.662515 | 45.2  | 45.2  |       |
| Base CRBG surface           |                     |           |             |       |       |       |
| 1741 exposure               | Wells et al., 2020a | 45.332593 | -122.659793 | 23.3  | 23.3  |       |
| Base CRBG surface           |                     |           |             |       |       |       |
| 1742 exposure               | Wells et al., 2020a | 45.327791 | -122.655763 | 42.1  | 42.1  |       |
| Base CRBG surface           |                     |           |             |       |       |       |
| 1743 exposure               | Wells et al., 2020a | 45.324092 | -122.657173 | 57.5  | 57.5  |       |
| Base CRBG surface           |                     |           |             |       |       |       |
| 1744 exposure               | Wells et al., 2020a | 45.320974 | -122.657441 | 73.6  | 73.5  |       |
| Base CRBG surface           |                     |           |             |       |       |       |
| 1745 exposure               | Wells et al., 2020a | 45.311831 | -122.660508 | 41.2  | 41.2  |       |
| Base CRBG surface           |                     |           |             |       |       |       |
| 1746 exposure               | Wells et al., 2020a | 45.868764 | -122.695777 | 26.0  | 26.0  |       |
| Base CRBG surface           |                     |           |             |       |       |       |
| 1747 exposure               | Wells et al., 2020a | 45.865889 | -122.690772 | 15.8  | 15.8  |       |
| Base CRBG surface           |                     |           |             |       |       |       |
| 1748 exposure               | Wells et al., 2020a | 45.863684 | -122.686448 | 6.8   | 6.8   |       |
| 1749 CRBG minimum thickness | Wells et al., 2020a | 45.90154  | -122.8445   | 211.0 | 0.0   | 104.5 |
| Pre-CRBG surface            |                     |           |             |       |       |       |
| 1750 exposure               | Wells et al., 2020a | 45.457725 | -122.683455 | 131.0 | 0.0   |       |



|                  |                     |           |             |       |     |
|------------------|---------------------|-----------|-------------|-------|-----|
| Pre-CRBG surface |                     |           |             |       |     |
| 1751 exposure    | Wells et al., 2020a | 45.455635 | -122.683192 | 133.1 | 0.0 |
| Pre-CRBG surface |                     |           |             |       |     |
| 1752 exposure    | Wells et al., 2020a | 45.454372 | -122.681513 | 122.4 | 0.0 |
| Pre-CRBG surface |                     |           |             |       |     |
| 1753 exposure    | Wells et al., 2020a | 45.452536 | -122.682276 | 100.3 | 0.0 |
| Pre-CRBG surface |                     |           |             |       |     |
| 1754 exposure    | Wells et al., 2020a | 45.451314 | -122.684929 | 84.3  | 0.0 |
| Pre-CRBG surface |                     |           |             |       |     |
| 1755 exposure    | Wells et al., 2020a | 45.449784 | -122.686569 | 71.1  | 0.0 |
| Pre-CRBG surface |                     |           |             |       |     |
| 1756 exposure    | Wells et al., 2020a | 45.448208 | -122.686897 | 56.4  | 0.0 |
| Pre-CRBG surface |                     |           |             |       |     |
| 1757 exposure    | Wells et al., 2020a | 45.446111 | -122.687027 | 60.2  | 0.0 |
| Pre-CRBG surface |                     |           |             |       |     |
| 1758 exposure    | Wells et al., 2020a | 45.445255 | -122.687755 | 79.6  | 0.0 |
| Pre-CRBG surface |                     |           |             |       |     |
| 1759 exposure    | Wells et al., 2020a | 45.443808 | -122.69221  | 74.8  | 0.0 |
| Pre-CRBG surface |                     |           |             |       |     |
| 1760 exposure    | Wells et al., 2020a | 45.443084 | -122.696844 | 114.7 | 0.0 |
| Pre-CRBG surface |                     |           |             |       |     |
| 1761 exposure    | Wells et al., 2020a | 45.442336 | -122.695591 | 129.8 | 0.0 |
| Pre-CRBG surface |                     |           |             |       |     |
| 1762 exposure    | Wells et al., 2020a | 45.441392 | -122.692023 | 126.4 | 0.0 |
| Pre-CRBG surface |                     |           |             |       |     |
| 1763 exposure    | Wells et al., 2020a | 45.44281  | -122.688076 | 97.3  | 0.0 |
| Pre-CRBG surface |                     |           |             |       |     |
| 1764 exposure    | Wells et al., 2020a | 45.441039 | -122.685452 | 99.1  | 0.0 |
| Pre-CRBG surface |                     |           |             |       |     |
| 1765 exposure    | Wells et al., 2020a | 45.438227 | -122.685145 | 91.7  | 0.0 |
| Pre-CRBG surface |                     |           |             |       |     |
| 1766 exposure    | Wells et al., 2020a | 45.437304 | -122.686444 | 93.3  | 0.0 |
| Pre-CRBG surface |                     |           |             |       |     |
| 1767 exposure    | Wells et al., 2020a | 45.438464 | -122.68836  | 95.2  | 0.0 |
| Pre-CRBG surface |                     |           |             |       |     |
| 1768 exposure    | Wells et al., 2020a | 45.43758  | -122.692724 | 115.2 | 0.0 |
| Pre-CRBG surface |                     |           |             |       |     |
| 1769 exposure    | Wells et al., 2020a | 45.436426 | -122.695924 | 137.0 | 0.0 |
| Pre-CRBG surface |                     |           |             |       |     |
| 1770 exposure    | Wells et al., 2020a | 45.434537 | -122.69969  | 150.0 | 0.0 |
| Pre-CRBG surface |                     |           |             |       |     |
| 1771 exposure    | Wells et al., 2020a | 45.4322   | -122.702481 | 143.0 | 0.0 |
| Pre-CRBG surface |                     |           |             |       |     |
| 1772 exposure    | Wells et al., 2020a | 45.430334 | -122.702988 | 139.8 | 0.0 |
| Pre-CRBG surface |                     |           |             |       |     |
| 1773 exposure    | Wells et al., 2020a | 45.427396 | -122.704459 | 128.9 | 0.0 |
| Pre-CRBG surface |                     |           |             |       |     |
| 1774 exposure    | Wells et al., 2020a | 45.426229 | -122.702375 | 133.8 | 0.0 |
| Pre-CRBG surface |                     |           |             |       |     |
| 1775 exposure    | Wells et al., 2020a | 45.423517 | -122.695291 | 106.7 | 0.0 |
| Pre-CRBG surface |                     |           |             |       |     |
| 1776 exposure    | Wells et al., 2020a | 45.422959 | -122.691397 | 103.9 | 0.0 |
| Pre-CRBG surface |                     |           |             |       |     |
| 1777 exposure    | Wells et al., 2020a | 45.424268 | -122.687018 | 98.3  | 0.0 |
| Pre-CRBG surface |                     |           |             |       |     |
| 1778 exposure    | Wells et al., 2020a | 45.424337 | -122.683128 | 88.2  | 0.0 |
| Pre-CRBG surface |                     |           |             |       |     |
| 1779 exposure    | Wells et al., 2020a | 45.425787 | -122.6807   | 74.8  | 0.0 |

|                  |                     |           |             |       |     |
|------------------|---------------------|-----------|-------------|-------|-----|
| Pre-CRBG surface |                     |           |             |       |     |
| 1780 exposure    | Wells et al., 2020a | 45.42773  | -122.678324 | 64.6  | 0.0 |
| Pre-CRBG surface |                     |           |             |       |     |
| 1781 exposure    | Wells et al., 2020a | 45.429542 | -122.674752 | 35.2  | 0.0 |
| Pre-CRBG surface |                     |           |             |       |     |
| 1782 exposure    | Wells et al., 2020a | 45.432155 | -122.673192 | 33.7  | 0.0 |
| Pre-CRBG surface |                     |           |             |       |     |
| 1783 exposure    | Wells et al., 2020a | 45.435569 | -122.677278 | 45.9  | 0.0 |
| Pre-CRBG surface |                     |           |             |       |     |
| 1784 exposure    | Wells et al., 2020a | 45.436415 | -122.680073 | 48.8  | 0.0 |
| Pre-CRBG surface |                     |           |             |       |     |
| 1785 exposure    | Wells et al., 2020a | 45.436664 | -122.682107 | 69.3  | 0.0 |
| Pre-CRBG surface |                     |           |             |       |     |
| 1786 exposure    | Wells et al., 2020a | 45.441825 | -122.682902 | 63.9  | 0.0 |
| Pre-CRBG surface |                     |           |             |       |     |
| 1787 exposure    | Wells et al., 2020a | 45.444    | -122.684784 | 63.0  | 0.0 |
| Pre-CRBG surface |                     |           |             |       |     |
| 1788 exposure    | Wells et al., 2020a | 45.445421 | -122.68396  | 46.8  | 0.0 |
| Pre-CRBG surface |                     |           |             |       |     |
| 1789 exposure    | Wells et al., 2020a | 45.444839 | -122.680191 | 69.8  | 0.0 |
| Pre-CRBG surface |                     |           |             |       |     |
| 1790 exposure    | Wells et al., 2020a | 45.443712 | -122.677818 | 59.6  | 0.0 |
| Pre-CRBG surface |                     |           |             |       |     |
| 1791 exposure    | Wells et al., 2020a | 45.441799 | -122.677205 | 68.0  | 0.0 |
| Pre-CRBG surface |                     |           |             |       |     |
| 1792 exposure    | Wells et al., 2020a | 45.43911  | -122.676319 | 66.8  | 0.0 |
| Pre-CRBG surface |                     |           |             |       |     |
| 1793 exposure    | Wells et al., 2020a | 45.439603 | -122.673652 | 63.3  | 0.0 |
| Pre-CRBG surface |                     |           |             |       |     |
| 1794 exposure    | Wells et al., 2020a | 45.438232 | -122.67203  | 68.0  | 0.0 |
| Pre-CRBG surface |                     |           |             |       |     |
| 1795 exposure    | Wells et al., 2020a | 45.437048 | -122.672545 | 61.7  | 0.0 |
| Pre-CRBG surface |                     |           |             |       |     |
| 1796 exposure    | Wells et al., 2020a | 45.435556 | -122.674081 | 54.5  | 0.0 |
| Pre-CRBG surface |                     |           |             |       |     |
| 1797 exposure    | Wells et al., 2020a | 45.435498 | -122.672049 | 53.5  | 0.0 |
| Pre-CRBG surface |                     |           |             |       |     |
| 1798 exposure    | Wells et al., 2020a | 45.433753 | -122.671145 | 70.1  | 0.0 |
| Pre-CRBG surface |                     |           |             |       |     |
| 1799 exposure    | Wells et al., 2020a | 45.433441 | -122.668415 | 71.8  | 0.0 |
| Pre-CRBG surface |                     |           |             |       |     |
| 1800 exposure    | Wells et al., 2020a | 45.431922 | -122.666222 | 69.9  | 0.0 |
| Pre-CRBG surface |                     |           |             |       |     |
| 1801 exposure    | Wells et al., 2020a | 45.42874  | -122.666216 | 52.6  | 0.0 |
| Pre-CRBG surface |                     |           |             |       |     |
| 1802 exposure    | Wells et al., 2020a | 45.428474 | -122.662833 | 62.6  | 0.0 |
| Pre-CRBG surface |                     |           |             |       |     |
| 1803 exposure    | Wells et al., 2020a | 45.429823 | -122.660561 | 59.8  | 0.0 |
| Pre-CRBG surface |                     |           |             |       |     |
| 1804 exposure    | Wells et al., 2020a | 45.430868 | -122.660379 | 73.8  | 0.0 |
| Pre-CRBG surface |                     |           |             |       |     |
| 1805 exposure    | Wells et al., 2020a | 45.432933 | -122.661665 | 105.3 | 0.0 |
| Pre-CRBG surface |                     |           |             |       |     |
| 1806 exposure    | Wells et al., 2020a | 45.434224 | -122.660788 | 108.6 | 0.0 |
| Pre-CRBG surface |                     |           |             |       |     |
| 1807 exposure    | Wells et al., 2020a | 45.435911 | -122.660052 | 107.1 | 0.0 |
| Pre-CRBG surface |                     |           |             |       |     |
| 1808 exposure    | Wells et al., 2020a | 45.438302 | -122.659178 | 111.1 | 0.0 |

|                  |                     |           |             |       |     |
|------------------|---------------------|-----------|-------------|-------|-----|
| Pre-CRBG surface |                     |           |             |       |     |
| 1809 exposure    | Wells et al., 2020a | 45.440525 | -122.659121 | 125.1 | 0.0 |
| Pre-CRBG surface |                     |           |             |       |     |
| 1810 exposure    | Wells et al., 2020a | 45.443274 | -122.661272 | 115.5 | 0.0 |
| Pre-CRBG surface |                     |           |             |       |     |
| 1811 exposure    | Wells et al., 2020a | 45.446244 | -122.662784 | 135.4 | 0.0 |
| Pre-CRBG surface |                     |           |             |       |     |
| 1812 exposure    | Wells et al., 2020a | 45.448138 | -122.66517  | 116.7 | 0.0 |
| Pre-CRBG surface |                     |           |             |       |     |
| 1813 exposure    | Wells et al., 2020a | 45.451908 | -122.668276 | 122.9 | 0.0 |
| Pre-CRBG surface |                     |           |             |       |     |
| 1814 exposure    | Wells et al., 2020a | 45.453918 | -122.667544 | 76.4  | 0.0 |
| Pre-CRBG surface |                     |           |             |       |     |
| 1815 exposure    | Wells et al., 2020a | 45.455262 | -122.663758 | 37.5  | 0.0 |
| Pre-CRBG surface |                     |           |             |       |     |
| 1816 exposure    | Wells et al., 2020a | 45.459781 | -122.682684 | 141.4 | 0.0 |
| Pre-CRBG surface |                     |           |             |       |     |
| 1817 exposure    | Wells et al., 2020a | 45.461869 | -122.681542 | 119.5 | 0.0 |
| Pre-CRBG surface |                     |           |             |       |     |
| 1818 exposure    | Wells et al., 2020a | 45.463829 | -122.678749 | 92.5  | 0.0 |
| Pre-CRBG surface |                     |           |             |       |     |
| 1819 exposure    | Wells et al., 2020a | 45.464981 | -122.675499 | 69.1  | 0.0 |
| Pre-CRBG surface |                     |           |             |       |     |
| 1820 exposure    | Wells et al., 2020a | 45.46466  | -122.672401 | 77.3  | 0.0 |
| Pre-CRBG surface |                     |           |             |       |     |
| 1821 exposure    | Wells et al., 2020a | 45.462213 | -122.671344 | 79.0  | 0.0 |
| Pre-CRBG surface |                     |           |             |       |     |
| 1822 exposure    | Wells et al., 2020a | 45.46182  | -122.669552 | 43.1  | 0.0 |
| Pre-CRBG surface |                     |           |             |       |     |
| 1823 exposure    | Wells et al., 2020a | 45.46334  | -122.668679 | 17.7  | 0.0 |
| Pre-CRBG surface |                     |           |             |       |     |
| 1824 exposure    | Wells et al., 2020a | 45.461461 | -122.667645 | 11.9  | 0.0 |
| Pre-CRBG surface |                     |           |             |       |     |
| 1825 exposure    | Wells et al., 2020a | 45.45973  | -122.666215 | 13.6  | 0.0 |
| Pre-CRBG surface |                     |           |             |       |     |
| 1826 exposure    | Wells et al., 2020a | 45.458626 | -122.664655 | 3.7   | 0.0 |
| Pre-CRBG surface |                     |           |             |       |     |
| 1827 exposure    | Wells et al., 2020a | 45.457343 | -122.663554 | 3.6   | 0.0 |
| Pre-CRBG surface |                     |           |             |       |     |
| 1828 exposure    | Wells et al., 2020a | 45.455469 | -122.661649 | 2.6   | 0.0 |
| Pre-CRBG surface |                     |           |             |       |     |
| 1829 exposure    | Wells et al., 2020a | 45.453983 | -122.660407 | 2.4   | 0.0 |
| Pre-CRBG surface |                     |           |             |       |     |
| 1830 exposure    | Wells et al., 2020a | 45.45348  | -122.661534 | 31.4  | 0.0 |
| Pre-CRBG surface |                     |           |             |       |     |
| 1831 exposure    | Wells et al., 2020a | 45.452343 | -122.664686 | 46.8  | 0.0 |
| Pre-CRBG surface |                     |           |             |       |     |
| 1832 exposure    | Wells et al., 2020a | 45.450285 | -122.66464  | 61.8  | 0.0 |
| Pre-CRBG surface |                     |           |             |       |     |
| 1833 exposure    | Wells et al., 2020a | 45.448175 | -122.660787 | 74.7  | 0.0 |
| Pre-CRBG surface |                     |           |             |       |     |
| 1834 exposure    | Wells et al., 2020a | 45.446411 | -122.658159 | 69.6  | 0.0 |
| Pre-CRBG surface |                     |           |             |       |     |
| 1835 exposure    | Wells et al., 2020a | 45.443991 | -122.657352 | 63.1  | 0.0 |
| Pre-CRBG surface |                     |           |             |       |     |
| 1836 exposure    | Wells et al., 2020a | 45.4512   | -122.658426 | 2.6   | 0.0 |
| Pre-CRBG surface |                     |           |             |       |     |
| 1837 exposure    | Wells et al., 2020a | 45.448642 | -122.657233 | 2.6   | 0.0 |

|                  |                     |           |             |       |     |
|------------------|---------------------|-----------|-------------|-------|-----|
| Pre-CRBG surface |                     |           |             |       |     |
| 1838 exposure    | Wells et al., 2020a | 45.445022 | -122.653875 | 0.6   | 0.0 |
| Pre-CRBG surface |                     |           |             |       |     |
| 1839 exposure    | Wells et al., 2020a | 45.442997 | -122.653489 | 43.3  | 0.0 |
| Pre-CRBG surface |                     |           |             |       |     |
| 1840 exposure    | Wells et al., 2020a | 45.448814 | -122.650427 | 18.6  | 0.0 |
| Pre-CRBG surface |                     |           |             |       |     |
| 1841 exposure    | Wells et al., 2020a | 45.447083 | -122.648275 | 17.3  | 0.0 |
| Pre-CRBG surface |                     |           |             |       |     |
| 1842 exposure    | Wells et al., 2020a | 45.45266  | -122.649264 | 28.2  | 0.1 |
| Pre-CRBG surface |                     |           |             |       |     |
| 1843 exposure    | Wells et al., 2020a | 45.451625 | -122.645727 | 19.9  | 0.0 |
| Pre-CRBG surface |                     |           |             |       |     |
| 1844 exposure    | Wells et al., 2020a | 45.449872 | -122.644717 | 16.7  | 0.0 |
| Pre-CRBG surface |                     |           |             |       |     |
| 1845 exposure    | Wells et al., 2020a | 45.446738 | -122.645507 | 15.5  | 0.0 |
| Pre-CRBG surface |                     |           |             |       |     |
| 1846 exposure    | Wells et al., 2020a | 45.444996 | -122.645431 | 11.8  | 0.0 |
| Pre-CRBG surface |                     |           |             |       |     |
| 1847 exposure    | Wells et al., 2020a | 45.429658 | -122.697416 | 137.8 | 0.0 |
| Pre-CRBG surface |                     |           |             |       |     |
| 1848 exposure    | Wells et al., 2020a | 45.433646 | -122.692794 | 143.7 | 0.0 |
| Pre-CRBG surface |                     |           |             |       |     |
| 1849 exposure    | Wells et al., 2020a | 45.43088  | -122.691456 | 134.9 | 0.0 |
| Pre-CRBG surface |                     |           |             |       |     |
| 1850 exposure    | Wells et al., 2020a | 45.427026 | -122.692966 | 137.1 | 0.0 |
| Pre-CRBG surface |                     |           |             |       |     |
| 1851 exposure    | Wells et al., 2020a | 45.427011 | -122.687419 | 104.1 | 0.0 |
| Pre-CRBG surface |                     |           |             |       |     |
| 1852 exposure    | Wells et al., 2020a | 45.432107 | -122.68712  | 101.7 | 0.0 |
| Pre-CRBG surface |                     |           |             |       |     |
| 1853 exposure    | Wells et al., 2020a | 45.431086 | -122.679549 | 89.9  | 0.0 |
| Pre-CRBG surface |                     |           |             |       |     |
| 1854 exposure    | Wells et al., 2020a | 45.434623 | -122.684062 | 94.6  | 0.0 |
| Pre-CRBG surface |                     |           |             |       |     |
| 1855 exposure    | Wells et al., 2020a | 45.448622 | -122.682495 | 77.8  | 0.0 |
| Pre-CRBG surface |                     |           |             |       |     |
| 1856 exposure    | Wells et al., 2020a | 45.451137 | -122.678962 | 101.3 | 0.0 |
| Pre-CRBG surface |                     |           |             |       |     |
| 1857 exposure    | Wells et al., 2020a | 45.448882 | -122.673426 | 152.6 | 0.0 |
| Pre-CRBG surface |                     |           |             |       |     |
| 1858 exposure    | Wells et al., 2020a | 45.446983 | -122.675602 | 121.8 | 0.0 |
| Pre-CRBG surface |                     |           |             |       |     |
| 1859 exposure    | Wells et al., 2020a | 45.445059 | -122.668982 | 151.4 | 0.0 |
| Pre-CRBG surface |                     |           |             |       |     |
| 1860 exposure    | Wells et al., 2020a | 45.442777 | -122.670348 | 123.3 | 0.0 |
| Pre-CRBG surface |                     |           |             |       |     |
| 1861 exposure    | Wells et al., 2020a | 45.439517 | -122.663128 | 134.3 | 0.0 |
| Pre-CRBG surface |                     |           |             |       |     |
| 1862 exposure    | Wells et al., 2020a | 45.437244 | -122.667674 | 96.3  | 0.0 |
| Pre-CRBG surface |                     |           |             |       |     |
| 1863 exposure    | Wells et al., 2020a | 45.441099 | -122.666704 | 146.0 | 0.0 |
| Pre-CRBG surface |                     |           |             |       |     |
| 1864 exposure    | Wells et al., 2020a | 45.454848 | -122.677655 | 146.2 | 0.0 |
| Pre-CRBG surface |                     |           |             |       |     |
| 1865 exposure    | Wells et al., 2020a | 45.452643 | -122.672727 | 128.6 | 0.0 |
| Pre-CRBG surface |                     |           |             |       |     |
| 1866 exposure    | Wells et al., 2020a | 45.459565 | -122.677966 | 146.8 | 0.0 |

|                            |                     |           |             |       |     |
|----------------------------|---------------------|-----------|-------------|-------|-----|
| Pre-CRBG surface           |                     |           |             |       |     |
| 1867 exposure              | Wells et al., 2020a | 45.461701 | -122.675517 | 118.2 | 0.0 |
| Pre-CRBG surface           |                     |           |             |       |     |
| 1868 exposure              | Wells et al., 2020a | 45.457693 | -122.673172 | 123.7 | 0.0 |
| Pre-CRBG surface           |                     |           |             |       |     |
| 1869 exposure              | Wells et al., 2020a | 45.45816  | -122.66992  | 92.3  | 0.0 |
| Pre-CRBG surface           |                     |           |             |       |     |
| 1870 exposure              | Wells et al., 2020a | 45.45639  | -122.66702  | 80.1  | 0.0 |
| Pre-CRBG surface           |                     |           |             |       |     |
| 1871 exposure              | Wells et al., 2020a | 45.447729 | -122.669981 | 144.0 | 0.0 |
| Pre-CRBG surface           |                     |           |             |       |     |
| 1872 exposure              | Wells et al., 2020a | 45.435852 | -122.664029 | 129.3 | 0.0 |
| Pre-CRBG surface           |                     |           |             |       |     |
| 1873 exposure              | Wells et al., 2020a | 45.429992 | -122.66359  | 72.2  | 0.0 |
| 1874 CRBG surface exposure | Wells et al., 2020a | 45.758644 | -122.893004 | 77.9  | 0.0 |
| 1875 CRBG surface exposure | Wells et al., 2020a | 45.765804 | -122.890802 | 63.9  | 0.0 |
| 1876 CRBG surface exposure | Wells et al., 2020a | 45.77367  | -122.890119 | 48.5  | 0.0 |
| 1877 CRBG surface exposure | Wells et al., 2020a | 45.783199 | -122.897779 | 79.7  | 0.0 |
| 1878 CRBG surface exposure | Wells et al., 2020a | 45.791801 | -122.900635 | 100.0 | 0.0 |
| 1879 CRBG surface exposure | Wells et al., 2020a | 45.796065 | -122.894267 | 64.2  | 0.0 |
| 1880 CRBG surface exposure | Wells et al., 2020a | 45.803258 | -122.896281 | 73.8  | 0.0 |
| 1881 CRBG surface exposure | Wells et al., 2020a | 45.810404 | -122.903926 | 129.9 | 0.0 |
| 1882 CRBG surface exposure | Wells et al., 2020a | 45.820516 | -122.898864 | 80.5  | 0.0 |
| 1883 CRBG surface exposure | Wells et al., 2020a | 45.831031 | -122.893351 | 73.3  | 0.0 |
| 1884 CRBG surface exposure | Wells et al., 2020a | 45.834375 | -122.88229  | 63.2  | 0.0 |
| 1885 CRBG surface exposure | Wells et al., 2020a | 45.861171 | -122.847721 | 87.8  | 0.0 |
| 1886 CRBG surface exposure | Wells et al., 2020a | 45.863954 | -122.836376 | 59.7  | 0.0 |
| 1887 CRBG surface exposure | Wells et al., 2020a | 45.857344 | -122.836779 | 39.5  | 0.0 |
| 1888 CRBG surface exposure | Wells et al., 2020a | 45.850127 | -122.844234 | 36.5  | 0.0 |
| 1889 CRBG surface exposure | Wells et al., 2020a | 45.843864 | -122.835666 | 23.2  | 0.0 |
| 1890 CRBG surface exposure | Wells et al., 2020a | 45.841619 | -122.815571 | 9.7   | 0.0 |
| 1891 CRBG surface exposure | Wells et al., 2020a | 45.846482 | -122.806156 | 9.4   | 0.0 |
| 1892 CRBG surface exposure | Wells et al., 2020a | 45.875741 | -122.800078 | 2.5   | 0.0 |
| 1893 CRBG surface exposure | Wells et al., 2020a | 45.865392 | -122.798391 | 9.0   | 0.0 |
| 1894 CRBG surface exposure | Wells et al., 2020a | 45.895571 | -122.819839 | 37.0  | 0.0 |
| 1895 CRBG surface exposure | Wells et al., 2020a | 45.909432 | -122.831896 | 84.7  | 0.0 |
| 1896 CRBG surface exposure | Wells et al., 2020a | 45.661373 | -122.897086 | 218.8 | 0.0 |
| 1897 CRBG surface exposure | Wells et al., 2020a | 45.669046 | -122.903263 | 283.8 | 0.0 |
| 1898 CRBG surface exposure | Wells et al., 2020a | 45.677326 | -122.905502 | 245.3 | 0.0 |
| 1899 CRBG surface exposure | Wells et al., 2020a | 45.687287 | -122.911348 | 360.6 | 0.0 |
| 1900 CRBG surface exposure | Wells et al., 2020a | 45.682272 | -122.876698 | 45.9  | 0.0 |
| 1901 CRBG surface exposure | Wells et al., 2020a | 45.703741 | -122.918817 | 304.5 | 0.0 |
| 1902 CRBG surface exposure | Wells et al., 2020a | 45.719642 | -122.962154 | 280.9 | 0.0 |
| 1903 CRBG surface exposure | Wells et al., 2020a | 45.728108 | -122.977185 | 312.0 | 0.0 |
| 1904 CRBG surface exposure | Wells et al., 2020a | 45.300398 | -122.676311 | 47.9  | 0.0 |
| 1905 CRBG surface exposure | Wells et al., 2020a | 45.303817 | -122.682325 | 61.9  | 0.0 |
| 1906 CRBG surface exposure | Wells et al., 2020a | 45.309049 | -122.686416 | 82.7  | 0.0 |
| 1907 CRBG surface exposure | Wells et al., 2020a | 45.316238 | -122.69185  | 84.3  | 0.0 |
| 1908 CRBG surface exposure | Wells et al., 2020a | 45.322366 | -122.694292 | 83.8  | 0.0 |
| 1909 CRBG surface exposure | Wells et al., 2020a | 45.327387 | -122.697034 | 104.3 | 0.0 |
| 1910 CRBG surface exposure | Wells et al., 2020a | 45.33019  | -122.698385 | 111.9 | 0.0 |

|                            |                     |           |             |       |     |
|----------------------------|---------------------|-----------|-------------|-------|-----|
| 1911 CRBG surface exposure | Wells et al., 2020a | 45.332511 | -122.701372 | 104.6 | 0.0 |
| 1912 CRBG surface exposure | Wells et al., 2020a | 45.333504 | -122.706101 | 113.8 | 0.0 |
| 1913 CRBG surface exposure | Wells et al., 2020a | 45.333626 | -122.711614 | 90.1  | 0.0 |
| 1914 CRBG surface exposure | Wells et al., 2020a | 45.332971 | -122.716045 | 74.3  | 0.0 |
| 1915 CRBG surface exposure | Wells et al., 2020a | 45.331896 | -122.725354 | 58.0  | 0.0 |
| 1916 CRBG surface exposure | Wells et al., 2020a | 45.332165 | -122.732729 | 85.2  | 0.0 |
| 1917 CRBG surface exposure | Wells et al., 2020a | 45.330064 | -122.738826 | 85.8  | 0.0 |
| 1918 CRBG surface exposure | Wells et al., 2020a | 45.333351 | -122.743482 | 89.4  | 0.0 |
| 1919 CRBG surface exposure | Wells et al., 2020a | 45.337489 | -122.738205 | 94.3  | 0.0 |
| 1920 CRBG surface exposure | Wells et al., 2020a | 45.337249 | -122.747753 | 93.0  | 0.0 |
| 1921 CRBG surface exposure | Wells et al., 2020a | 45.33339  | -122.753892 | 97.5  | 0.0 |
| 1922 CRBG surface exposure | Wells et al., 2020a | 45.338276 | -122.762496 | 100.1 | 0.0 |
| 1923 CRBG surface exposure | Wells et al., 2020a | 45.33947  | -122.773474 | 82.3  | 0.0 |
| 1924 CRBG surface exposure | Wells et al., 2020a | 45.343505 | -122.782796 | 80.0  | 0.0 |
| 1925 CRBG surface exposure | Wells et al., 2020a | 45.342561 | -122.797985 | 68.4  | 0.0 |
| 1926 CRBG surface exposure | Wells et al., 2020a | 45.329882 | -122.805275 | 62.8  | 0.0 |
| 1927 CRBG surface exposure | Wells et al., 2020a | 45.319514 | -122.798509 | 72.4  | 0.0 |
| 1928 CRBG surface exposure | Wells et al., 2020a | 45.313078 | -122.809227 | 77.1  | 0.0 |
| 1929 CRBG surface exposure | Wells et al., 2020a | 45.301528 | -122.82213  | 68.7  | 0.0 |
| 1930 CRBG surface exposure | Wells et al., 2020a | 45.289954 | -122.835688 | 95.9  | 0.0 |
| 1931 CRBG surface exposure | Wells et al., 2020a | 45.271704 | -122.852037 | 62.1  | 0.0 |
| 1932 CRBG surface exposure | Wells et al., 2020a | 45.274762 | -122.909746 | 66.4  | 0.0 |
| 1933 CRBG surface exposure | Wells et al., 2020a | 45.295949 | -122.918333 | 81.6  | 0.0 |
| 1934 CRBG surface exposure | Wells et al., 2020a | 45.315134 | -122.92493  | 62.7  | 0.0 |
| 1935 CRBG surface exposure | Wells et al., 2020a | 45.334585 | -122.937356 | 236.3 | 0.0 |
| 1936 CRBG surface exposure | Wells et al., 2020a | 45.342766 | -122.95852  | 319.2 | 0.0 |
| 1937 CRBG surface exposure | Wells et al., 2020a | 45.346586 | -122.98034  | 237.3 | 0.0 |
| 1938 CRBG surface exposure | Wells et al., 2020a | 45.363226 | -123.0216   | 293.7 | 0.0 |
| 1939 CRBG surface exposure | Wells et al., 2020a | 45.37543  | -123.04291  | 309.2 | 0.0 |
| 1940 CRBG surface exposure | Wells et al., 2020a | 45.398563 | -123.058739 | 389.8 | 0.0 |
| 1941 CRBG surface exposure | Wells et al., 2020a | 45.421697 | -123.055298 | 328.9 | 0.0 |
| 1942 CRBG surface exposure | Wells et al., 2020a | 45.430232 | -123.049253 | 296.3 | 0.0 |
| 1943 CRBG surface exposure | Wells et al., 2020a | 45.438875 | -123.048168 | 201.4 | 0.0 |
| 1944 CRBG surface exposure | Wells et al., 2020a | 45.444607 | -123.051633 | 221.7 | 0.0 |
| 1945 CRBG surface exposure | Wells et al., 2020a | 45.440637 | -123.06093  | 251.6 | 0.0 |
| 1946 CRBG surface exposure | Wells et al., 2020a | 45.433367 | -123.063683 | 221.6 | 0.0 |
| 1947 CRBG surface exposure | Wells et al., 2020a | 45.442302 | -123.08675  | 259.8 | 0.0 |
| 1948 CRBG surface exposure | Wells et al., 2020a | 45.452487 | -123.088479 | 194.5 | 0.0 |
| 1949 CRBG surface exposure | Wells et al., 2020a | 45.460243 | -123.092343 | 189.6 | 0.0 |
| 1950 CRBG surface exposure | Wells et al., 2020a | 45.469389 | -123.101184 | 185.2 | 0.0 |
| 1951 CRBG surface exposure | Wells et al., 2020a | 45.44034  | -122.897018 | 72.0  | 0.0 |
| 1952 CRBG surface exposure | Wells et al., 2020a | 45.432636 | -122.873884 | 97.0  | 0.0 |
| 1953 CRBG surface exposure | Wells et al., 2020a | 45.459599 | -122.847618 | 90.6  | 0.0 |
| 1954 CRBG surface exposure | Wells et al., 2020a | 45.454097 | -122.887651 | 181.1 | 0.0 |
| 1955 CRBG surface exposure | Wells et al., 2020a | 45.43605  | -122.85555  | 157.4 | 0.0 |
| 1956 CRBG surface exposure | Wells et al., 2020a | 45.413975 | -122.82306  | 185.0 | 0.0 |
| 1957 CRBG surface exposure | Wells et al., 2020a | 45.600187 | -122.845236 | 227.5 | 0.0 |
| 1958 CRBG surface exposure | Wells et al., 2020a | 45.779544 | -123.035367 | 572.8 | 0.0 |

|                            |                     |           |             |       |       |       |
|----------------------------|---------------------|-----------|-------------|-------|-------|-------|
| 1959 CRBG surface exposure | Wells et al., 2020a | 45.766497 | -123.040905 | 529.2 | 0.0   |       |
| 1960 CRBG surface exposure | Wells et al., 2020a | 45.757187 | -123.034619 | 488.0 | 0.0   |       |
| 1961 CRBG surface exposure | Wells et al., 2020a | 45.749434 | -123.030953 | 472.6 | 0.0   |       |
| 1962 CRBG surface exposure | Wells et al., 2020a | 45.739796 | -123.039706 | 441.6 | 0.0   |       |
| 1963 CRBG surface exposure | Wells et al., 2020a | 45.728883 | -123.046599 | 368.8 | 0.0   |       |
| 1964 CRBG surface exposure | Wells et al., 2020a | 45.718152 | -123.053745 | 260.9 | 0.0   |       |
| 1965 CRBG surface exposure | Wells et al., 2020a | 45.699641 | -123.046    | 319.0 | 0.0   |       |
| 1966 CRBG surface exposure | Wells et al., 2020a | 45.674511 | -123.02366  | 309.4 | 0.0   |       |
| 1967 CRBG surface exposure | Wells et al., 2020a | 45.642008 | -123.026384 | 121.9 | 0.0   |       |
| 1968 CRBG surface exposure | Wells et al., 2020a | 45.631832 | -123.041931 | 59.2  | 0.0   |       |
| 1969 CRBG surface exposure | Wells et al., 2020a | 45.643988 | -123.054037 | 102.1 | 0.0   |       |
| 1970 CRBG surface exposure | Wells et al., 2020a | 45.739646 | -123.12346  | 518.7 | 0.0   |       |
| 1971 CRBG surface exposure | Wells et al., 2020a | 45.724142 | -123.097666 | 402.2 | 0.0   |       |
| 1972 CRBG surface exposure | Wells et al., 2020a | 45.696852 | -123.101618 | 313.8 | 0.0   |       |
| 1973 CRBG surface exposure | Wells et al., 2020a | 45.750877 | -123.113227 | 497.0 | 0.0   |       |
| 1974 CRBG surface exposure | Wells et al., 2020a | 45.754046 | -123.09286  | 435.8 | 0.0   |       |
| 1975 CRBG surface exposure | Wells et al., 2020a | 45.48881  | -123.089157 | 110.4 | 0.0   |       |
| 1976 CRBG surface exposure | Wells et al., 2020a | 45.596352 | -123.169803 | 86.5  | 0.0   |       |
| 1977 CRBG surface exposure | Wells et al., 2020a | 45.603363 | -123.14899  | 85.0  | 0.0   |       |
| 1978 CRBG surface exposure | Wells et al., 2020a | 45.610083 | -123.145679 | 57.3  | 0.0   |       |
| 1979 CRBG surface exposure | Wells et al., 2020a | 45.366845 | -122.615267 | 49.7  | 0.0   |       |
| 1980 CRBG surface exposure | Wells et al., 2020a | 45.379701 | -122.638552 | 105.3 | 0.0   |       |
| 1981 CRBG surface exposure | Wells et al., 2020a | 45.3995   | -122.66008  | 101.2 | 0.0   |       |
| 1982 CRBG surface exposure | Wells et al., 2020a | 45.407582 | -122.673883 | 77.9  | 0.0   |       |
| 1983 CRBG surface exposure | Wells et al., 2020a | 45.464001 | -122.68797  | 128.9 | 0.0   |       |
| 1984 CRBG surface exposure | Wells et al., 2020a | 45.471167 | -122.693859 | 131.0 | 0.0   |       |
| 1985 CRBG surface exposure | Wells et al., 2020a | 45.478169 | -122.692788 | 164.5 | 0.0   |       |
| 1986 CRBG surface exposure | Wells et al., 2020a | 45.485627 | -122.690289 | 260.7 | 0.0   |       |
| 1987 CRBG surface exposure | Wells et al., 2020a | 45.494533 | -122.707577 | 242.6 | 0.0   |       |
| 1988 interpolation guide   |                     | 45.809516 | -122.710938 | 61.9  | 107.6 | 321.0 |
| 1989 interpolation guide   |                     | 45.768046 | -122.698391 | 77.1  | 168.6 | 397.2 |
| 1990 interpolation guide   |                     | 45.715825 | -122.673685 | 57.3  | 301.1 | 545.0 |
| 1991 interpolation guide   |                     | 45.664962 | -122.628637 | 84.1  | 358.4 | 617.5 |
| 1992 interpolation guide   |                     | 45.626148 | -122.562707 | 90.8  | 365.2 | 624.2 |
| 1993 interpolation guide   |                     | 45.673557 | -122.832617 | 4.1   | 65.1  | 232.9 |
| 1994 interpolation guide   |                     | 45.874761 | -122.68537  | 79.8  | 0.0   |       |
| 1995 interpolation guide   |                     | 45.874198 | -122.676921 | 84.0  | 0.0   |       |
| 1996 interpolation guide   |                     | 45.871539 | -122.669584 | 82.1  | 0.0   |       |
| 1997 interpolation guide   |                     | 45.864955 | -122.655944 | 60.8  | 0.0   |       |
| 1998 interpolation guide   |                     | 45.862749 | -122.64978  | 60.9  | 0.0   |       |
| 1999 interpolation guide   |                     | 45.85958  | -122.643587 | 60.6  | 0.0   |       |
| 2000 interpolation guide   |                     | 45.854644 | -122.62977  | 66.4  | 0.0   |       |
| 2001 interpolation guide   |                     | 45.850805 | -122.621879 | 71.4  | 0.0   |       |
| 2002 interpolation guide   |                     | 45.847292 | -122.614052 | 78.6  | 0.0   |       |
| 2003 interpolation guide   |                     | 45.842629 | -122.604107 | 84.4  | 0.0   |       |
| 2004 interpolation guide   |                     | 45.840008 | -122.590225 | 94.9  | 0.0   |       |
| 2005 interpolation guide   |                     | 45.836145 | -122.580932 | 88.2  | 0.0   |       |
| 2006 interpolation guide   |                     | 45.830803 | -122.573859 | 90.4  | 0.0   |       |

|                                            |                      |           |             |       |       |       |
|--------------------------------------------|----------------------|-----------|-------------|-------|-------|-------|
| 2007 interpolation guide                   |                      | 45.82392  | -122.567371 | 87.4  | 0.0   |       |
| 2008 interpolation guide                   |                      | 45.812777 | -122.557909 | 79.3  | 0.0   |       |
| 2009 interpolation guide                   |                      | 45.789319 | -122.54429  | 92.8  | 0.0   |       |
| 2010 interpolation guide                   |                      | 45.777018 | -122.519053 | 91.3  | 0.0   |       |
| 2011 interpolation guide                   |                      | 45.75513  | -122.496448 | 84.6  | 0.0   |       |
| 2012 interpolation guide                   |                      | 45.738908 | -122.490132 | 86.1  | 0.0   |       |
| 2013 interpolation guide                   |                      | 45.721362 | -122.487673 | 89.5  | 0.0   |       |
| 2014 interpolation guide                   |                      | 45.705192 | -122.489227 | 85.8  | 0.0   |       |
| 2015 interpolation guide                   |                      | 45.687342 | -122.493887 | 74.9  | 0.0   |       |
| 2016 interpolation guide                   |                      | 45.669339 | -122.498412 | 64.1  | 0.0   |       |
| 2017 interpolation guide                   |                      | 45.644453 | -122.48352  | 70.3  | 0.0   |       |
| 2018 interpolation guide                   |                      | 45.627395 | -122.476888 | 82.4  | 0.0   |       |
| 2019 interpolation guide<br>CRBG elevation |                      | 45.605627 | -122.48184  | 82.7  | 0.0   |       |
| 2020 interpretation                        | Swanson et al., 1993 | 45.735187 | -122.530129 | 91.3  | 53.5  | 114.3 |
| 2021 interpolation guide                   |                      | 45.75187  | -122.5449   | 83.9  | 114.4 | 144.9 |
| 2022 interpolation guide                   |                      | 45.770758 | -122.563803 | 83.7  | 114.1 | 144.6 |
| 2023 interpolation guide                   |                      | 45.793215 | -122.583032 | 80.8  | 111.3 | 141.8 |
| 2024 interpolation guide                   |                      | 45.821424 | -122.613817 | 11.0  | 41.4  | 71.9  |
| 2025 interpolation guide                   |                      | 45.844877 | -122.649433 | 5.8   | 21.0  | 82.0  |
| 2026 interpolation guide                   |                      | 45.712738 | -122.526181 | 87.0  | 117.5 | 148.0 |
| 2027 interpolation guide                   |                      | 45.677236 | -122.521724 | 74.8  | 105.3 | 135.8 |
| 2028 interpolation guide                   |                      | 45.640287 | -122.513212 | 92.8  | 153.7 | 214.7 |
| 2029 interpolation guide                   |                      | 45.799861 | -122.64516  | 83.2  | 174.7 | 266.1 |
| 2030 interpolation guide                   |                      | 45.753216 | -122.641783 | 87.7  | 270.6 | 423.0 |
| 2031 interpolation guide                   |                      | 45.704396 | -122.608387 | 78.5  | 261.4 | 413.8 |
| 2032 interpolation guide                   |                      | 45.666273 | -122.561033 | 69.9  | 313.7 | 466.1 |
| 2033 interpolation guide                   |                      | 45.613584 | -122.76491  | 14.4  | 197.3 |       |
| 2034 WASH_61621                            | OWRD                 | 45.406712 | -122.83083  | 126.4 | 15.5  | 311.8 |
| 2035 CLAC_20275                            | OWRD                 | 45.301619 | -122.501704 | 132.5 | 80.1  | 136.9 |
| 2036 CLAC_935                              | OWRD                 | 45.45414  | -122.313506 | 203.4 | 333.6 | 543.5 |
| 2037 CLAC_59769                            | OWRD                 | 45.331864 | -122.356994 | 115.8 | 248.4 | 467.9 |
| 2038 CLAC_3477                             | OWRD                 | 45.368967 | -122.698533 | 55.6  | 70.7  | 137.2 |
| 2039 CLAC_3526                             | OWRD                 | 45.364217 | -122.7271   | 135.3 | 2.7   | 123.1 |
| 2040 WASH_717                              | OWRD                 | 45.349957 | -122.846266 | 58.0  | 78.7  | 243.8 |
| 2041 CLAC_15585                            | OWRD                 | 45.315284 | -122.846133 | 184.4 | 0.9   | 178.3 |
| 2042 YAMH_886                              | OWRD                 | 45.30965  | -122.89905  | 246.9 | 23.8  | 243.8 |
| 2043 YAMH_885                              | OWRD                 | 45.30915  | -122.899783 | 253.7 | 1.4   | 132.9 |
| 2044 WASH_58005                            | OWRD                 | 45.463467 | -122.814716 | 107.5 | 1.5   | 146.3 |
| 2045 WASH_55918                            | OWRD                 | 45.462889 | -122.816355 | 110.4 | 11.2  | 147.8 |
| CRBG elevation                             |                      |           |             |       |       |       |
| 2046 interpretation                        | Swanson et al., 1993 | 45.542067 | -122.668459 | 49.1  | 77.6  | 230.1 |
| 2047 interpolation guide                   |                      | 45.563773 | -122.700088 | 12.7  | 40.1  | 408.9 |
| 2048 interpolation guide                   |                      | 45.586913 | -122.73524  | 20.4  | 47.3  | 422.8 |
| 2049 interpolation guide                   |                      | 45.616629 | -122.777588 | 9.0   | 36.1  | 441.8 |
| 2050 interpolation guide                   |                      | 45.575241 | -122.717111 | 49.4  | 77.0  | 451.7 |
| 2051 interpolation guide                   |                      | 45.524999 | -122.64357  | 44.2  | 71.6  | 416.1 |
| 2052 interpolation guide                   |                      | 45.600549 | -122.755049 | 21.8  | 49.3  | 424.2 |
| 2053 interpolation guide                   |                      | 45.553327 | -122.683882 | 56.4  | 123.5 | 428.3 |



|      |                       |                     |           |             |       |     |       |
|------|-----------------------|---------------------|-----------|-------------|-------|-----|-------|
| 2054 | CRBG surface exposure | Wells et al., 2020a | 45.623695 | -122.817253 | 73.2  | 0.0 |       |
| 2055 | CRBG surface exposure | Wells et al., 2020a | 45.622111 | -122.815622 | 76.5  | 0.0 |       |
| 2056 | CRBG surface exposure | Wells et al., 2020a | 45.620172 | -122.813661 | 74.9  | 0.0 |       |
| 2057 | CRBG surface exposure | Wells et al., 2020a | 45.619645 | -122.812086 | 54.4  | 0.0 |       |
| 2058 | CRBG surface exposure | Wells et al., 2020a | 45.617411 | -122.811932 | 98.0  | 0.0 |       |
| 2059 | CRBG surface exposure | Wells et al., 2020a | 45.61715  | -122.809178 | 53.7  | 0.0 |       |
| 2060 | CRBG surface exposure | Wells et al., 2020a | 45.616234 | -122.806838 | 67.5  | 0.0 |       |
| 2061 | CRBG surface exposure | Wells et al., 2020a | 45.614529 | -122.804534 | 68.1  | 0.0 |       |
| 2062 | CRBG surface exposure | Wells et al., 2020a | 45.613246 | -122.801467 | 52.0  | 0.0 |       |
| 2063 | CRBG surface exposure | Wells et al., 2020a | 45.611641 | -122.799474 | 55.9  | 0.0 |       |
| 2064 | CRBG surface exposure | Wells et al., 2020a | 45.609981 | -122.797261 | 51.5  | 0.0 |       |
| 2065 | CRBG surface exposure | Wells et al., 2020a | 45.608383 | -122.795571 | 51.6  | 0.0 |       |
| 2066 | CRBG surface exposure | Wells et al., 2020a | 45.606744 | -122.793914 | 57.8  | 0.0 |       |
| 2067 | CRBG surface exposure | Wells et al., 2020a | 45.604413 | -122.791445 | 51.4  | 0.0 |       |
| 2068 | CRBG surface exposure | Wells et al., 2020a | 45.602904 | -122.791592 | 84.1  | 0.0 |       |
| 2069 | CRBG surface exposure | Wells et al., 2020a | 45.601423 | -122.792008 | 109.8 | 0.0 |       |
| 2070 | CRBG surface exposure | Wells et al., 2020a | 45.600659 | -122.789598 | 87.4  | 0.0 |       |
| 2071 | CRBG surface exposure | Wells et al., 2020a | 45.598392 | -122.789854 | 113.4 | 0.0 |       |
| 2072 | CRBG surface exposure | Wells et al., 2020a | 45.597039 | -122.788826 | 109.1 | 0.0 |       |
| 2073 | CRBG surface exposure | Wells et al., 2020a | 45.595208 | -122.788401 | 99.9  | 0.0 |       |
| 2074 | CRBG surface exposure | Wells et al., 2020a | 45.594167 | -122.78574  | 93.2  | 0.0 | 243.8 |
| 2075 | CRBG surface exposure | Wells et al., 2020a | 45.592839 | -122.785069 | 105.1 | 0.0 |       |
| 2076 | CRBG surface exposure | Wells et al., 2020a | 45.590696 | -122.782514 | 99.5  | 0.0 |       |
| 2077 | CRBG surface exposure | Wells et al., 2020a | 45.589326 | -122.780897 | 96.6  | 0.0 |       |
| 2078 | CRBG surface exposure | Wells et al., 2020a | 45.58799  | -122.777128 | 87.5  | 0.0 |       |
| 2079 | CRBG surface exposure | Wells et al., 2020a | 45.584165 | -122.770012 | 52.1  | 0.0 |       |
| 2080 | CRBG surface exposure | Wells et al., 2020a | 45.582661 | -122.76834  | 55.6  | 0.0 |       |
| 2081 | CRBG surface exposure | Wells et al., 2020a | 45.581003 | -122.766349 | 44.9  | 0.0 |       |
| 2082 | CRBG surface exposure | Wells et al., 2020a | 45.580116 | -122.765066 | 36.9  | 0.0 |       |
| 2083 | CRBG surface exposure | Wells et al., 2020a | 45.578496 | -122.763097 | 22.9  | 0.0 |       |
| 2084 | CRBG surface exposure | Wells et al., 2020a | 45.577241 | -122.761767 | 17.4  | 0.0 |       |
| 2085 | CRBG surface exposure | Wells et al., 2020a | 45.573925 | -122.760994 | 30.8  | 0.0 |       |
| 2086 | CRBG surface exposure | Wells et al., 2020a | 45.572909 | -122.759319 | 43.2  | 0.0 |       |
| 2087 | CRBG surface exposure | Wells et al., 2020a | 45.572196 | -122.757167 | 22.2  | 0.0 |       |
| 2088 | CRBG surface exposure | Wells et al., 2020a | 45.570684 | -122.755803 | 17.5  | 0.0 |       |
| 2089 | CRBG surface exposure | Wells et al., 2020a | 45.569515 | -122.754712 | 16.6  | 0.0 |       |
| 2090 | CRBG surface exposure | Wells et al., 2020a | 45.568778 | -122.754012 | 18.7  | 0.0 |       |
| 2091 | CRBG surface exposure | Wells et al., 2020a | 45.568011 | -122.753421 | 24.0  | 0.0 |       |
| 2092 | CRBG surface exposure | Wells et al., 2020a | 45.567472 | -122.752543 | 23.1  | 0.0 |       |
| 2093 | CRBG surface exposure | Wells et al., 2020a | 45.566853 | -122.752038 | 33.1  | 0.0 |       |
| 2094 | CRBG surface exposure | Wells et al., 2020a | 45.566412 | -122.751072 | 22.6  | 0.0 |       |
| 2095 | CRBG surface exposure | Wells et al., 2020a | 45.56603  | -122.750566 | 19.7  | 0.0 |       |
| 2096 | CRBG surface exposure | Wells et al., 2020a | 45.565552 | -122.749912 | 18.2  | 0.0 |       |
| 2097 | CRBG surface exposure | Wells et al., 2020a | 45.564965 | -122.749238 | 19.1  | 0.0 |       |
| 2098 | CRBG surface exposure | Wells et al., 2020a | 45.564198 | -122.74851  | 23.9  | 0.0 |       |
| 2099 | CRBG surface exposure | Wells et al., 2020a | 45.563548 | -122.747794 | 21.0  | 0.0 |       |
| 2100 | CRBG surface exposure | Wells et al., 2020a | 45.563254 | -122.74701  | 18.1  | 0.0 |       |
| 2101 | CRBG surface exposure | Wells et al., 2020a | 45.562749 | -122.746265 | 15.9  | 0.0 |       |

|                            |                     |           |             |       |     |
|----------------------------|---------------------|-----------|-------------|-------|-----|
| 2102 CRBG surface exposure | Wells et al., 2020a | 45.562175 | -122.745398 | 20.5  | 0.0 |
| 2103 CRBG surface exposure | Wells et al., 2020a | 45.561571 | -122.744375 | 19.1  | 0.0 |
| 2104 CRBG surface exposure | Wells et al., 2020a | 45.561307 | -122.743762 | 16.5  | 0.0 |
| 2105 CRBG surface exposure | Wells et al., 2020a | 45.560872 | -122.742979 | 17.2  | 0.0 |
| 2106 CRBG surface exposure | Wells et al., 2020a | 45.560245 | -122.741985 | 14.1  | 0.0 |
| 2107 CRBG surface exposure | Wells et al., 2020a | 45.559555 | -122.740934 | 14.6  | 0.0 |
| 2108 CRBG surface exposure | Wells et al., 2020a | 45.558773 | -122.740009 | 21.5  | 0.0 |
| 2109 CRBG surface exposure | Wells et al., 2020a | 45.558165 | -122.739293 | 21.7  | 0.0 |
| 2110 CRBG surface exposure | Wells et al., 2020a | 45.557547 | -122.738399 | 20.4  | 0.0 |
| 2111 CRBG surface exposure | Wells et al., 2020a | 45.557134 | -122.737447 | 14.0  | 0.0 |
| 2112 CRBG surface exposure | Wells et al., 2020a | 45.5564   | -122.736119 | 12.0  | 0.0 |
| 2113 CRBG surface exposure | Wells et al., 2020a | 45.55579  | -122.735315 | 12.9  | 0.0 |
| 2114 CRBG surface exposure | Wells et al., 2020a | 45.555022 | -122.734453 | 18.5  | 0.0 |
| 2115 CRBG surface exposure | Wells et al., 2020a | 45.554237 | -122.733616 | 17.6  | 0.0 |
| 2116 CRBG surface exposure | Wells et al., 2020a | 45.553586 | -122.732957 | 13.7  | 0.0 |
| 2117 CRBG surface exposure | Wells et al., 2020a | 45.553023 | -122.73233  | 16.6  | 0.0 |
| 2118 CRBG surface exposure | Wells et al., 2020a | 45.552366 | -122.731583 | 15.4  | 0.0 |
| 2119 CRBG surface exposure | Wells et al., 2020a | 45.551648 | -122.731119 | 23.1  | 0.0 |
| 2120 CRBG surface exposure | Wells et al., 2020a | 45.550738 | -122.730311 | 17.6  | 0.0 |
| 2121 CRBG surface exposure | Wells et al., 2020a | 45.549999 | -122.729604 | 15.3  | 0.0 |
| 2122 CRBG surface exposure | Wells et al., 2020a | 45.549603 | -122.72913  | 23.4  | 0.0 |
| 2123 CRBG surface exposure | Wells et al., 2020a | 45.549085 | -122.728281 | 20.2  | 0.0 |
| 2124 CRBG surface exposure | Wells et al., 2020a | 45.548487 | -122.727389 | 13.4  | 0.0 |
| 2125 CRBG surface exposure | Wells et al., 2020a | 45.547512 | -122.726554 | 16.8  | 0.0 |
| 2126 CRBG surface exposure | Wells et al., 2020a | 45.546939 | -122.725918 | 14.1  | 0.0 |
| 2127 CRBG surface exposure | Wells et al., 2020a | 45.546213 | -122.724967 | 13.6  | 0.0 |
| 2128 CRBG surface exposure | Wells et al., 2020a | 45.545614 | -122.724267 | 24.4  | 0.0 |
| 2129 CRBG surface exposure | Wells et al., 2020a | 45.544946 | -122.723609 | 16.4  | 0.0 |
| 2130 CRBG surface exposure | Wells et al., 2020a | 45.544255 | -122.723017 | 18.5  | 0.0 |
| 2131 CRBG surface exposure | Wells et al., 2020a | 45.543552 | -122.722742 | 36.1  | 0.0 |
| 2132 CRBG surface exposure | Wells et al., 2020a | 45.542797 | -122.723147 | 62.4  | 0.0 |
| 2133 CRBG surface exposure | Wells et al., 2020a | 45.542145 | -122.723723 | 73.0  | 0.0 |
| 2134 CRBG surface exposure | Wells et al., 2020a | 45.541659 | -122.72396  | 78.5  | 0.0 |
| 2135 CRBG surface exposure | Wells et al., 2020a | 45.54129  | -122.723337 | 69.9  | 0.0 |
| 2136 CRBG surface exposure | Wells et al., 2020a | 45.540754 | -122.722726 | 46.0  | 0.0 |
| 2137 CRBG surface exposure | Wells et al., 2020a | 45.539861 | -122.722841 | 85.3  | 0.0 |
| 2138 CRBG surface exposure | Wells et al., 2020a | 45.539    | -122.722767 | 115.6 | 0.0 |
| 2139 CRBG surface exposure | Wells et al., 2020a | 45.538673 | -122.721487 | 101.6 | 0.0 |
| 2140 CRBG surface exposure | Wells et al., 2020a | 45.537932 | -122.721358 | 111.0 | 0.0 |
| 2141 CRBG surface exposure | Wells et al., 2020a | 45.537393 | -122.721892 | 130.9 | 0.0 |
| 2142 CRBG surface exposure | Wells et al., 2020a | 45.536937 | -122.721129 | 129.2 | 0.0 |
| 2143 CRBG surface exposure | Wells et al., 2020a | 45.536237 | -122.720553 | 115.3 | 0.0 |
| 2144 CRBG surface exposure | Wells et al., 2020a | 45.535466 | -122.719763 | 113.1 | 0.0 |
| 2145 CRBG surface exposure | Wells et al., 2020a | 45.534871 | -122.719178 | 110.7 | 0.0 |
| 2146 CRBG surface exposure | Wells et al., 2020a | 45.533321 | -122.719102 | 98.0  | 0.0 |
| 2147 CRBG surface exposure | Wells et al., 2020a | 45.533149 | -122.716718 | 88.8  | 0.0 |
| 2148 CRBG surface exposure | Wells et al., 2020a | 45.534729 | -122.713722 | 55.9  | 0.0 |
| 2149 CRBG surface exposure | Wells et al., 2020a | 45.535552 | -122.711372 | 37.8  | 0.0 |

|                            |                     |           |             |       |     |
|----------------------------|---------------------|-----------|-------------|-------|-----|
| 2150 CRBG surface exposure | Wells et al., 2020a | 45.529466 | -122.712797 | 172.3 | 0.0 |
| 2151 CRBG surface exposure | Wells et al., 2020a | 45.527684 | -122.710547 | 162.8 | 0.0 |
| 2152 CRBG surface exposure | Wells et al., 2020a | 45.526599 | -122.707754 | 166.6 | 0.0 |
| 2153 CRBG surface exposure | Wells et al., 2020a | 45.527885 | -122.704587 | 93.3  | 0.0 |
| 2154 CRBG surface exposure | Wells et al., 2020a | 45.52747  | -122.702871 | 73.7  | 0.0 |
| 2155 CRBG surface exposure | Wells et al., 2020a | 45.534813 | -122.712159 | 47.8  | 0.0 |
| 2156 CRBG surface exposure | Wells et al., 2020a | 45.533866 | -122.712888 | 63.3  | 0.0 |
| 2157 CRBG surface exposure | Wells et al., 2020a | 45.532365 | -122.713717 | 89.5  | 0.0 |
| 2158 CRBG surface exposure | Wells et al., 2020a | 45.531293 | -122.715945 | 136.1 | 0.0 |
| 2159 CRBG surface exposure | Wells et al., 2020a | 45.53017  | -122.716444 | 131.6 | 0.0 |
| 2160 CRBG surface exposure | Wells et al., 2020a | 45.529436 | -122.715161 | 169.2 | 0.0 |
| 2161 CRBG surface exposure | Wells et al., 2020a | 45.524191 | -122.700195 | 58.3  | 0.0 |
| 2162 CRBG surface exposure | Wells et al., 2020a | 45.523251 | -122.701555 | 81.8  | 0.0 |
| 2163 CRBG surface exposure | Wells et al., 2020a | 45.522056 | -122.701669 | 101.2 | 0.0 |
| 2164 CRBG surface exposure | Wells et al., 2020a | 45.521328 | -122.700591 | 98.0  | 0.0 |
| 2165 CRBG surface exposure | Wells et al., 2020a | 45.519548 | -122.701567 | 75.7  | 0.0 |
| 2166 CRBG surface exposure | Wells et al., 2020a | 45.51925  | -122.697283 | 51.0  | 0.0 |
| 2167 CRBG surface exposure | Wells et al., 2020a | 45.515795 | -122.694499 | 65.5  | 0.0 |
| 2168 CRBG surface exposure | Wells et al., 2020a | 45.513202 | -122.691814 | 71.1  | 0.0 |
| 2169 CRBG surface exposure | Wells et al., 2020a | 45.511737 | -122.689973 | 69.3  | 0.0 |
| 2170 CRBG surface exposure | Wells et al., 2020a | 45.510275 | -122.688691 | 70.9  | 0.0 |
| 2171 CRBG surface exposure | Wells et al., 2020a | 45.509002 | -122.687472 | 65.9  | 0.0 |
| 2172 CRBG surface exposure | Wells et al., 2020a | 45.507843 | -122.68652  | 69.6  | 0.0 |
| 2173 CRBG surface exposure | Wells et al., 2020a | 45.502048 | -122.682207 | 62.5  | 0.0 |
| 2174 CRBG surface exposure | Wells et al., 2020a | 45.500789 | -122.681029 | 59.4  | 0.0 |
| 2175 CRBG surface exposure | Wells et al., 2020a | 45.49943  | -122.679784 | 52.9  | 0.0 |
| 2176 CRBG surface exposure | Wells et al., 2020a | 45.497993 | -122.678838 | 60.9  | 0.0 |
| 2177 CRBG surface exposure | Wells et al., 2020a | 45.496785 | -122.677576 | 53.1  | 0.0 |
| 2178 CRBG surface exposure | Wells et al., 2020a | 45.49513  | -122.676018 | 53.3  | 0.0 |
| 2179 CRBG surface exposure | Wells et al., 2020a | 45.493832 | -122.674509 | 36.4  | 0.0 |
| 2180 CRBG surface exposure | Wells et al., 2020a | 45.493052 | -122.673088 | 19.5  | 0.0 |
| 2181 CRBG surface exposure | Wells et al., 2020a | 45.491365 | -122.673099 | 20.3  | 0.0 |
| 2182 CRBG surface exposure | Wells et al., 2020a | 45.49002  | -122.674817 | 36.6  | 0.0 |
| 2183 CRBG surface exposure | Wells et al., 2020a | 45.488141 | -122.676145 | 28.0  | 0.0 |
| 2184 CRBG surface exposure | Wells et al., 2020a | 45.486741 | -122.678139 | 45.8  | 0.0 |
| 2185 CRBG surface exposure | Wells et al., 2020a | 45.485859 | -122.680726 | 53.3  | 0.0 |
| 2186 CRBG surface exposure | Wells et al., 2020a | 45.484937 | -122.67893  | 58.2  | 0.0 |
| 2187 CRBG surface exposure | Wells et al., 2020a | 45.48394  | -122.677632 | 31.8  | 0.0 |
| 2188 CRBG surface exposure | Wells et al., 2020a | 45.481963 | -122.677636 | 30.2  | 0.0 |
| 2189 CRBG surface exposure | Wells et al., 2020a | 45.480295 | -122.677938 | 32.4  | 0.0 |
| 2190 CRBG surface exposure | Wells et al., 2020a | 45.478536 | -122.677556 | 28.9  | 0.0 |
| 2191 CRBG surface exposure | Wells et al., 2020a | 45.475577 | -122.676325 | 38.5  | 0.0 |
| 2192 CRBG surface exposure | Wells et al., 2020a | 45.473426 | -122.675141 | 36.5  | 0.0 |
| 2193 CRBG surface exposure | Wells et al., 2020a | 45.471569 | -122.674187 | 30.5  | 0.0 |
| 2194 CRBG surface exposure | Wells et al., 2020a | 45.469326 | -122.672653 | 30.6  | 0.0 |
| 2195 CRBG surface exposure | Wells et al., 2020a | 45.467877 | -122.670853 | 27.0  | 0.0 |
| 2196 CRBG surface exposure | Wells et al., 2020a | 45.466301 | -122.669151 | 14.3  | 0.0 |
| 2197 CRBG surface exposure | Wells et al., 2020a | 45.464855 | -122.668216 | 9.0   | 0.0 |

|                            |                     |           |             |       |       |       |
|----------------------------|---------------------|-----------|-------------|-------|-------|-------|
| Geologic map -1000 ft      |                     |           |             |       |       |       |
| 2198 contour               | Wells et al., 2020a | 45.566393 | -122.645558 | 50.6  | 355.4 |       |
| Geologic map -1000 ft      |                     |           |             |       |       |       |
| 2199 contour               | Wells et al., 2020a | 45.608794 | -122.733471 | 3.4   | 308.2 |       |
| Geologic map -1000 ft      |                     |           |             |       |       |       |
| 2200 contour               | Wells et al., 2020a | 45.635301 | -122.765724 | 9.6   | 314.4 |       |
| 2201 interpolation guide   |                     | 45.602676 | -122.815424 | 246.2 | 0.0   | 243.8 |
| 2202 interpolation guide   |                     | 45.5701   | -122.781998 | 312.1 | 0.0   | 243.8 |
| 2203 interpolation guide   |                     | 45.638918 | -122.858347 | 82.6  | 0.0   | 243.8 |
| 2204 interpolation guide   |                     | 45.551837 | -122.539134 | 32.3  | 397.8 |       |
| 2205 CLAC_3107             | OWRD                | 45.397623 | -122.694542 | 151.8 | 29.9  | 276.5 |
| 2206 WASH_206              | OWRD                | 45.42051  | -123.05275  | 352.7 | 9.4   | 128.9 |
| 2207 WASH_633              | OWRD                | 45.468673 | -123.016256 | 60.1  | 18.3  | 217.9 |
| 2208 interpolation guide   |                     | 45.792569 | -122.94212  | 209.7 | 0.0   | 121.9 |
| 2209 interpolation guide   |                     | 45.667751 | -122.977385 | 209.0 | 0.0   | 121.9 |
| 2210 interpolation guide   |                     | 45.400901 | -123.011345 | 217.8 | 0.0   | 259.1 |
| 2211 interpolation guide   |                     | 45.434122 | -123.03002  | 156.0 | 0.0   | 152.7 |
| 2212 interpolation guide   |                     | 45.487107 | -122.945023 | 41.9  | 0.0   | 498.7 |
| 2213 245485                | WADOE               | 45.771439 | -122.56606  | 82.8  | 133.2 |       |
| 2214 313910                | WADOE               | 45.80692  | -122.653869 | 85.4  | 168.2 |       |
| 2215 CRBG surface exposure | Wells et al., 2020a | 45.53899  | -122.274891 | 136.6 | 0.0   |       |

†NAD 83 - North American Datum of 1983. Latitude/Longitude is in decimal degrees.

\* Sources:

Liberty, L.M., 2002, Procurement and reprocessing of an industry marine seismic reflection profile from the Columbia River , Oregon and Washington: USGS National Earthquake Hazards Reduction Program (NEHRP) Report, p. 1–14.

Liberty, L.M., Hemphill-Haley, M.A., and Madin, I.P., 2003, The Portland Hills Fault: Uncovering a hidden fault in Portland, Oregon using high-resolution geophysical methods: Tectonophysics, p. 89–103, doi:10.1016/S0040-1951(03)00152-5.

Roe, W.P., and Madin, I.P., 2013, 3D Geology and Shear-Wave Velocity Models of the Portland , Oregon , Metropolitan Area: Oregon Department of Geology and Mineral Industries Open-File Report O-13-12, p. 52.

Swanson, R.D., McFarland, W.D., Gonthier, J.B., and Wilkinson, J.M., 1993, A Description of Hydrogeologic Units in the Portland Basin, Oregon and Washington, U.S. Geological Survey Water-Resources Investigations Report 90-4196.

Wells, R.E. et al., 2020a, Geologic map of the greater Portland metropolitan area and surrounding region, Oregon and Washington: U.S. Geological Survey Scientific Investigations Map 3443, p. 55, 2 sheets, scale 1:63,360, <https://doi.org/10.3133/sim3443>.

Wilson, D.C., 1997, Post-Middle Miocene Geologic History of the Tualatin Basin, Oregon with Hydrogeologic Implications: Portland State University Ph.D. Dissertation, p. 310.
